# Supplementary material for: The Use of Aryl-Substituted Homophthalic Anhydrides in the Castagnoli–Cushman Reaction Provides Access to Novel Tetrahydroisoquinolone Carboxylic Acid Bearing an All-Carbon Quaternary Stereogenic Center
Source: MDPI journal article supplement (doi:10.3390/molecules27238462), 2022-12-02

## Supporting Information (SI)

### **The use of aryl-substituted homophthalic anhydrides in the Castagnoli-Cushman reaction provides access to novel tetrahydroisoquinolone carboxylic acid bearing an all-carbon quaternary stereogenic center**

Nazar Moshnenko<sup>a</sup>, Alexander Kazantsev<sup>a</sup>, Olga Bakulina<sup>a</sup>, Dmitry Dar'in<sup>a</sup> and Mikhail Krasavin<sup>\*,a,b</sup>

\* Corresponding author.

<sup>a</sup>Saint Petersburg State University, 26 Universitetskii prospect, Peterhof 198504 Russian Federation

<sup>b</sup>Immanuel Kant Baltic Federal University, Kaliningrad 236041 Russian Federation

E-mail: [m.krasavin@spbu.ru](mailto:m.krasavin@spbu.ru), URL: <http://krasavin-group.org>

### **Contents**

|                                                                                             |    |
|---------------------------------------------------------------------------------------------|----|
| 1. X-Ray crystallographic data .....                                                        | S2 |
| 2. References .....                                                                         | S3 |
| 3. Copies of <sup>1</sup> H, <sup>13</sup> C and <sup>19</sup> F NMR and HRMS spectra ..... | S6 |

## 1. X-ray crystallographic data

X-ray Single Crystal analysis was performed on Rigaku XtaLAB Synergy-S diffractometer with monochromated CuK $\alpha$  radiation. Crystal growth was performed by slow evaporation of solution in methanol/acetone mixture (1:1) at 5 °C. The crystal was kept at 100 K during data collection. Using Olex2[1], the structures were solved with the SHELXT[2] structure solution program using Intrinsic Phasing and refined with the SHELXL[3] refinement package using Least Squares minimization. CCDC 2211662 (**9a**) contain the supplementary crystallographic data for this paper. These data can be obtained free of charge from The Cambridge Crystallographic Data Centre via <https://www.ccdc.cam.ac.uk/>.

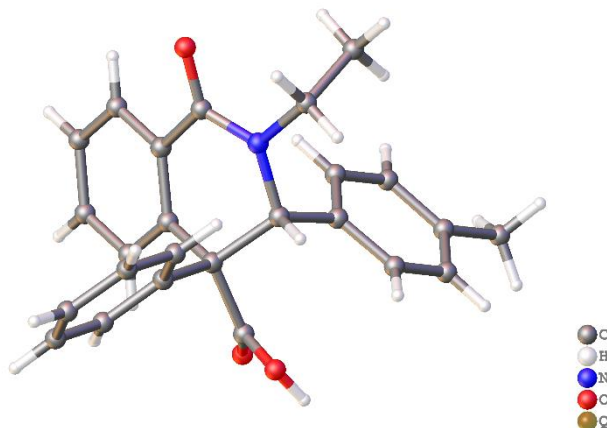

**Figure S1.** Crystal structure of compound **9a** (ORTEP plot at 50% probability level)

| <b>Table S1 Crystal data and structure refinement for compound 9a.</b> |                                                                           |
|------------------------------------------------------------------------|---------------------------------------------------------------------------|
| Identification code                                                    | 9a                                                                        |
| Empirical formula                                                      | C <sub>28.57</sub> H <sub>26.29</sub> N <sub>1.14</sub> O <sub>3.43</sub> |
| Formula weight                                                         | 440.51                                                                    |
| Temperature/K                                                          | 100.15                                                                    |
| Crystal system                                                         | orthorhombic                                                              |
| Space group                                                            | Pbca                                                                      |
| a/Å                                                                    | 15.8652(2)                                                                |
| b/Å                                                                    | 14.6469(2)                                                                |
| c/Å                                                                    | 16.7176(2)                                                                |
| $\alpha$ /°                                                            | 90                                                                        |
| $\beta$ /°                                                             | 90                                                                        |
| $\gamma$ /°                                                            | 90                                                                        |
| Volume/Å <sup>3</sup>                                                  | 3884.77(9)                                                                |
| Z                                                                      | 7                                                                         |
| $\rho_{\text{calc}}/\text{cm}^3$                                       | 1.318                                                                     |
| $\mu/\text{mm}^{-1}$                                                   | 0.689                                                                     |
| F(000)                                                                 | 1632.0                                                                    |
| Crystal size/mm <sup>3</sup>                                           | 0.28 × 0.24 × 0.16                                                        |
| Radiation                                                              | CuK $\alpha$ ( $\lambda$ = 1.54184)                                       |
| 2 $\theta$ range for data collection/°                                 | 9.774 to 152.44                                                           |
| Index ranges                                                           | -19 ≤ h ≤ 19, -18 ≤ k ≤ 18, -21 ≤ l ≤ 20                                  |

|                                                |                                                                  |
|------------------------------------------------|------------------------------------------------------------------|
| Reflections collected                          | 41022                                                            |
| Independent reflections                        | 4053 [ $R_{\text{int}} = 0.0439$ , $R_{\text{sigma}} = 0.0168$ ] |
| Data/restraints/parameters                     | 4053/0/265                                                       |
| Goodness-of-fit on $F^2$                       | 1.029                                                            |
| Final R indexes [ $I \geq 2\sigma(I)$ ]        | $R_1 = 0.0408$ , $wR_2 = 0.1069$                                 |
| Final R indexes [all data]                     | $R_1 = 0.0437$ , $wR_2 = 0.1105$                                 |
| Largest diff. peak/hole / $e \text{ \AA}^{-3}$ | 0.39/-0.22                                                       |

## 2. References

1. Dolomanov, O. V.; Bourhis, L. J.; Gildea, R. J.; Howard, J. A. K.; Puschmann, H., OLEX2: a complete structure solution, refinement and analysis program. *Journal of Applied Crystallography* **2009**, 42, (2), 339-341, 10.1107/s0021889808042726.
2. Sheldrick, G. M., SHELXT - integrated space-group and crystal-structure determination. *Acta Crystallogr A Found Adv* **2015**, 71, (Pt 1), 3-8, 10.1107/S2053273314026370.
3. Sheldrick, G. M., Crystal structure refinement with SHELXL. *Acta Crystallogr C Struct Chem* **2015**, 71, (Pt 1), 3-8, 10.1107/S2053229614024218.

No syntax errors found.  
Please wait while processing ....

[CIF dictionary](#)  
[Interpreting this report](#)

## Datablock: 1ver0-20683\_usa-041

|                        |                                              |                                 |
|------------------------|----------------------------------------------|---------------------------------|
| Bond precision:        | C-C = 0.0017 Å                               | Wavelength=1.54184              |
| Cell:                  | a=15.8652(2)    b=14.6469(2)    c=16.7176(2) |                                 |
|                        | alpha=90    beta=90    gamma=90              |                                 |
| Temperature: 100 K     |                                              |                                 |
|                        | Calculated                                   | Reported                        |
| Volume                 | 3884.77(9)                                   | 3884.77(9)                      |
| Space group            | P b c a                                      | P b c a                         |
| Hall group             | -P 2ac 2ab                                   | -P 2ac 2ab                      |
| Moiety formula         | C25 H23 N O3                                 | 1.143(C25 H23 N O3)             |
| Sum formula            | C25 H23 N O3                                 | C28.57 H26.29 N1.14 O3.43       |
| Mr                     | 385.44                                       | 440.51                          |
| Dx, g cm <sup>-3</sup> | 1.318                                        | 1.318                           |
| Z                      | 8                                            | 7                               |
| Mu (mm <sup>-1</sup> ) | 0.689                                        | 0.689                           |
| F000                   | 1632.0                                       | 1632.0                          |
| F000'                  | 1636.83                                      |                                 |
| h,k,lmax               | 19,18,21                                     | 19,18,21                        |
| Nref                   | 4062                                         | 4053                            |
| Tmin,Tmax              | 0.825,0.896                                  |                                 |
| Tmin'                  | 0.825                                        |                                 |
| Correction method=     | Not given                                    |                                 |
| Data completeness=     | 0.998                                        | Theta(max)= 76.220              |
| R(reflections)=        | 0.0408( 3728)                                | wR2(reflections)= 0.1105( 4053) |
| S =                    | 1.029                                        | Npar= 265                       |

The following ALERTS were generated. Each ALERT has the format

**test-name\_ALERT\_alert-type\_alert-level.**

Click on the hyperlinks for more details of the test.

### Alert level C

[PLAT052\\_ALERT\\_1\\_C](#) Info on Absorption Correction Method    Not Given    Please Do !

### Alert level G

[CELLZ01\\_ALERT\\_1\\_G](#) Difference between formula and atom\_site contents detected.

[CELLZ01\\_ALERT\\_1\\_G](#) ALERT: check formula stoichiometry or atom site occupancies.

From the CIF: \_cell\_formula\_units\_Z    7

From the CIF: \_chemical\_formula\_sum    C28.57 H26.29 N1.14 O3.43

TEST: Compare cell contents of formula and atom\_site data

| atom | Z*formula | cif sites | diff  |
|------|-----------|-----------|-------|
| C    | 199.99    | 200.00    | -0.01 |
| H    | 184.03    | 184.00    | 0.03  |
| N    | 7.98      | 8.00      | -0.02 |
| O    | 24.01     | 24.00     | 0.01  |

[PLAT007\\_ALERT\\_5\\_G](#) Number of Unrefined Donor-H Atoms .....    1 Report

[PLAT045\\_ALERT\\_1\\_G](#) Calculated and Reported Z Differ by a Factor ...    1.143 Check

[PLAT793\\_ALERT\\_4\\_G](#) Model has Chirality at C4    (Centro SPGR)    S Verify

[PLAT793\\_ALERT\\_4\\_G](#) Model has Chirality at C5    (Centro SPGR)    S Verify

[PLAT912\\_ALERT\\_4\\_G](#) Missing # of FCF Reflections Above STh/L= 0.600    9 Note

[PLAT978\\_ALERT\\_2\\_G](#) Number C-C Bonds with Positive Residual Density.    22 Info

0 **ALERT level A** = Most likely a serious problem - resolve or explain

0 **ALERT level B** = A potentially serious problem, consider carefully

1 **ALERT level C** = Check. Ensure it is not caused by an omission or oversight

8 **ALERT level G** = General information/check it is not something unexpected

4 ALERT type 1 CIF construction/syntax error, inconsistent or missing data

1 ALERT type 2 Indicator that the structure model may be wrong or deficient

0 ALERT type 3 Indicator that the structure quality may be low

3 ALERT type 4 Improvement, methodology, query or suggestion

1 ALERT type 5 Informative message, check

It is advisable to attempt to resolve as many as possible of the alerts in all categories. Often the minor



alerts point to easily fixed oversights, errors and omissions in your CIF or refinement strategy, so attention to these fine details can be worthwhile. In order to resolve some of the more serious problems it may be necessary to carry out additional measurements or structure refinements. However, the purpose of your study may justify the reported deviations and the more serious of these should normally be commented upon in the discussion or experimental section of a paper or in the "special\_details" fields of the CIF. checkCIF was carefully designed to identify outliers and unusual parameters, but every test has its limitations and alerts that are not important in a particular case may appear. Conversely, the absence of alerts does not guarantee there are no aspects of the results needing attention. It is up to the individual to critically assess their own results and, if necessary, seek expert advice.

### Publication of your CIF in IUCr journals

A basic structural check has been run on your CIF. These basic checks will be run on all CIFs submitted for publication in IUCr journals (*Acta Crystallographica*, *Journal of Applied Crystallography*, *Journal of Synchrotron Radiation*); however, if you intend to submit to *Acta Crystallographica Section C* or *E* or *IUCrData*, you should make sure that [full publication checks](#) are run on the final version of your CIF prior to submission.

### Publication of your CIF in other journals

Please refer to the *Notes for Authors* of the relevant journal for any special instructions relating to CIF submission.

---

PLATON version of 12/09/2022; check.def file version of 09/08/2022

### Datablock 1ver0-20683\_usa-041 - ellipsoid plot

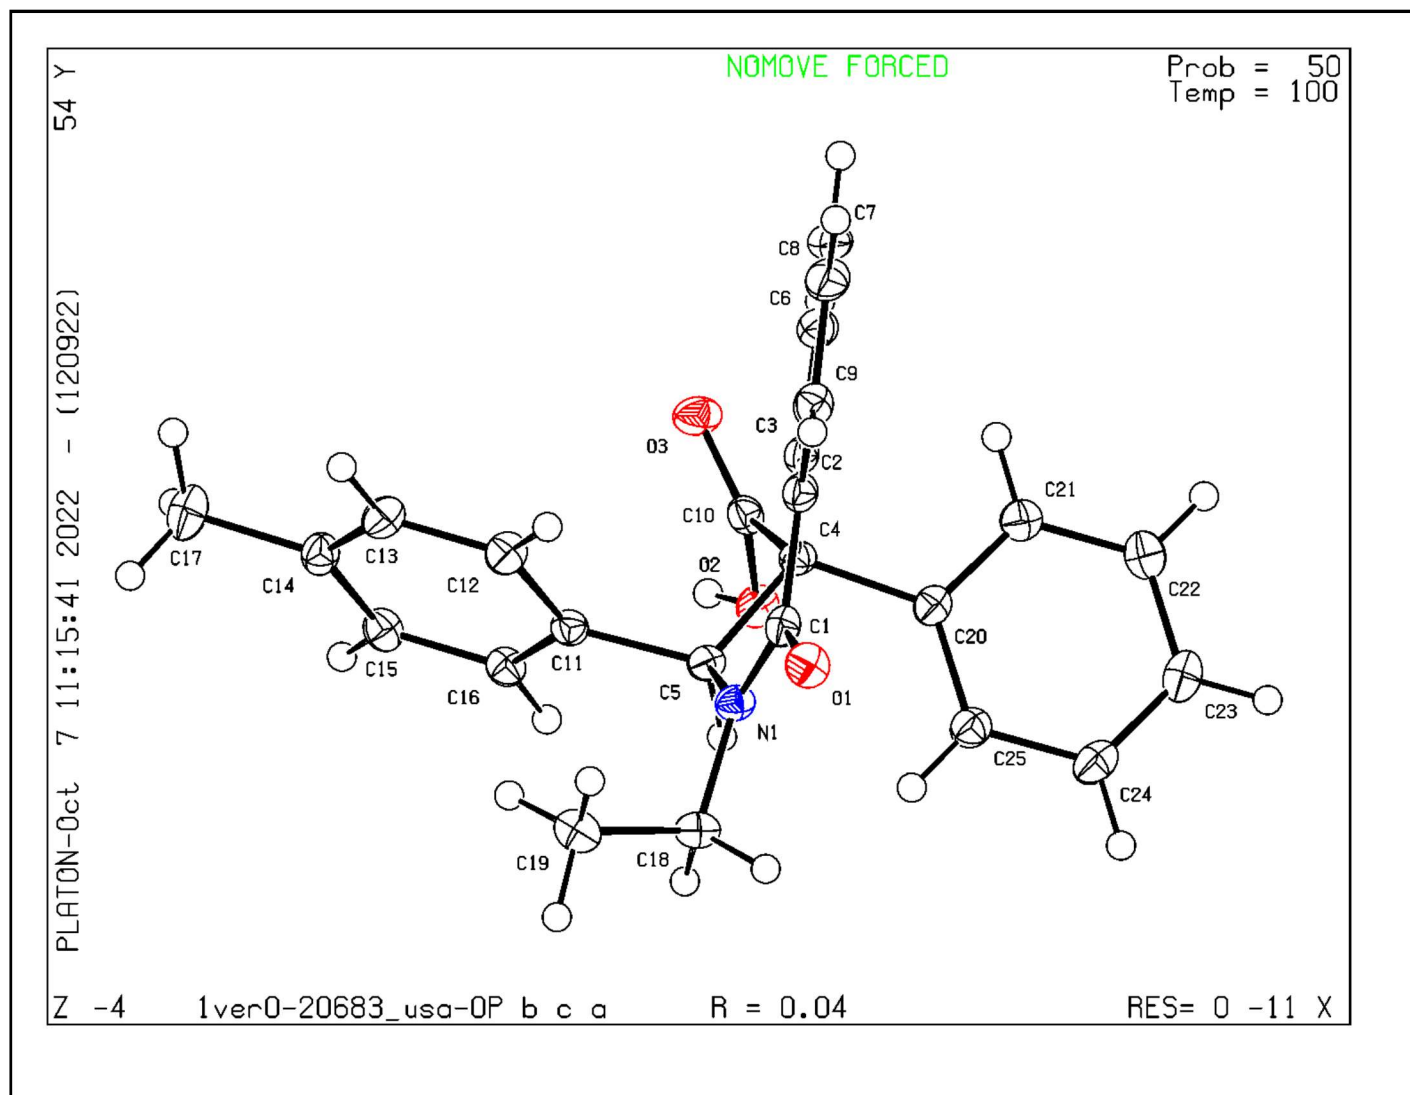

### 3. Copies of $^1\text{H}$ , $^{13}\text{C}$ and $^{19}\text{F}$ NMR spectra

#### $^1\text{H}$ and $^{13}\text{C}$ NMR spectra of compound **10a**

$^1\text{H}$  NMR, 400.13 MHz, DMSO- $d_6$

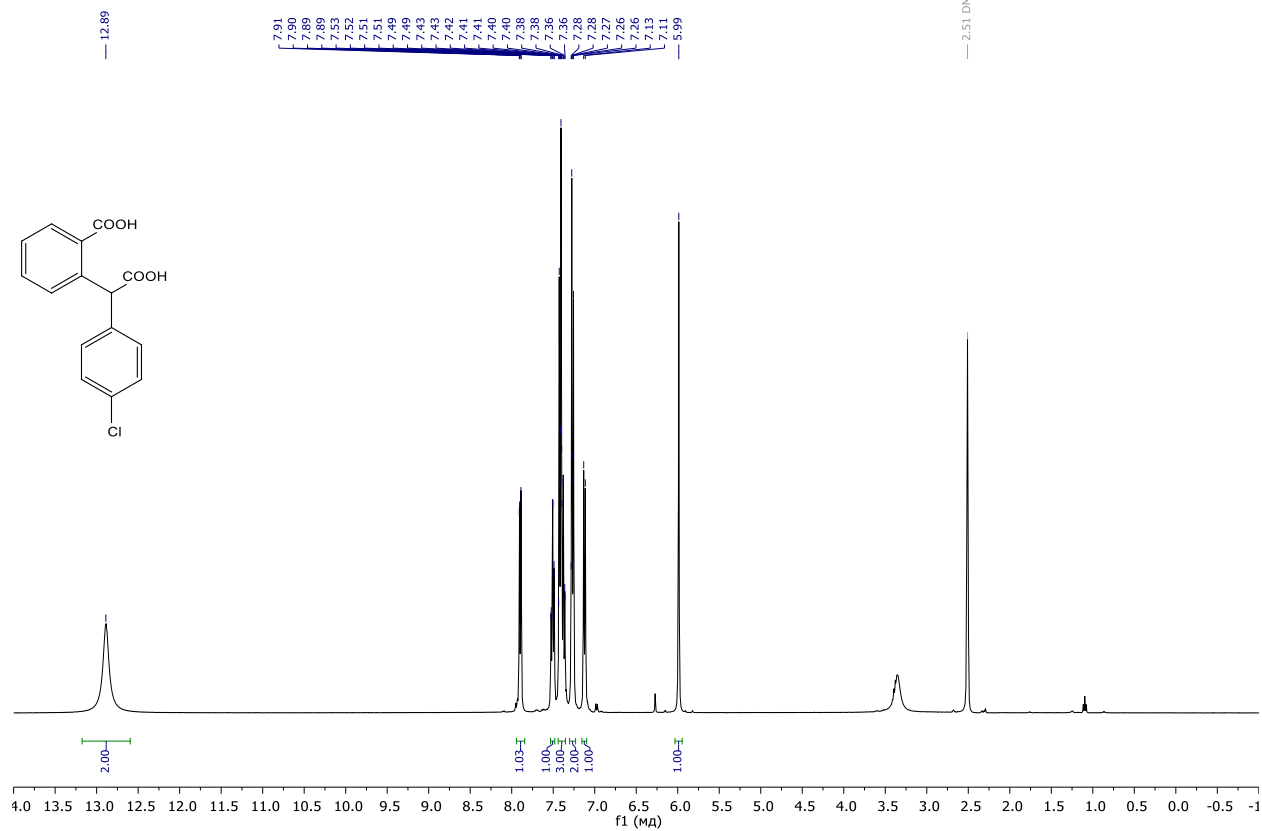

$^{13}\text{C}$  NMR, 100.61 MHz, DMSO- $d_6$

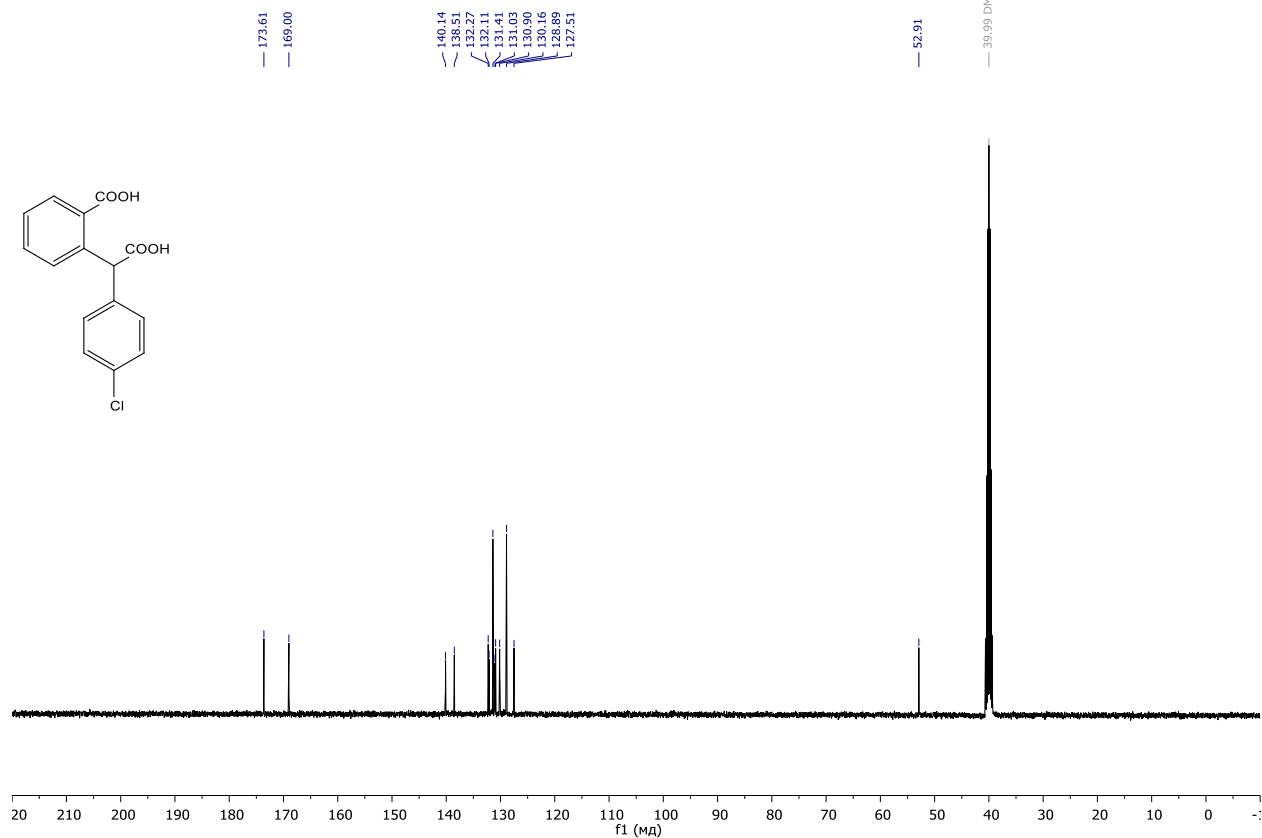

# <sup>1</sup>H and <sup>13</sup>C NMR spectra of compound **10b**

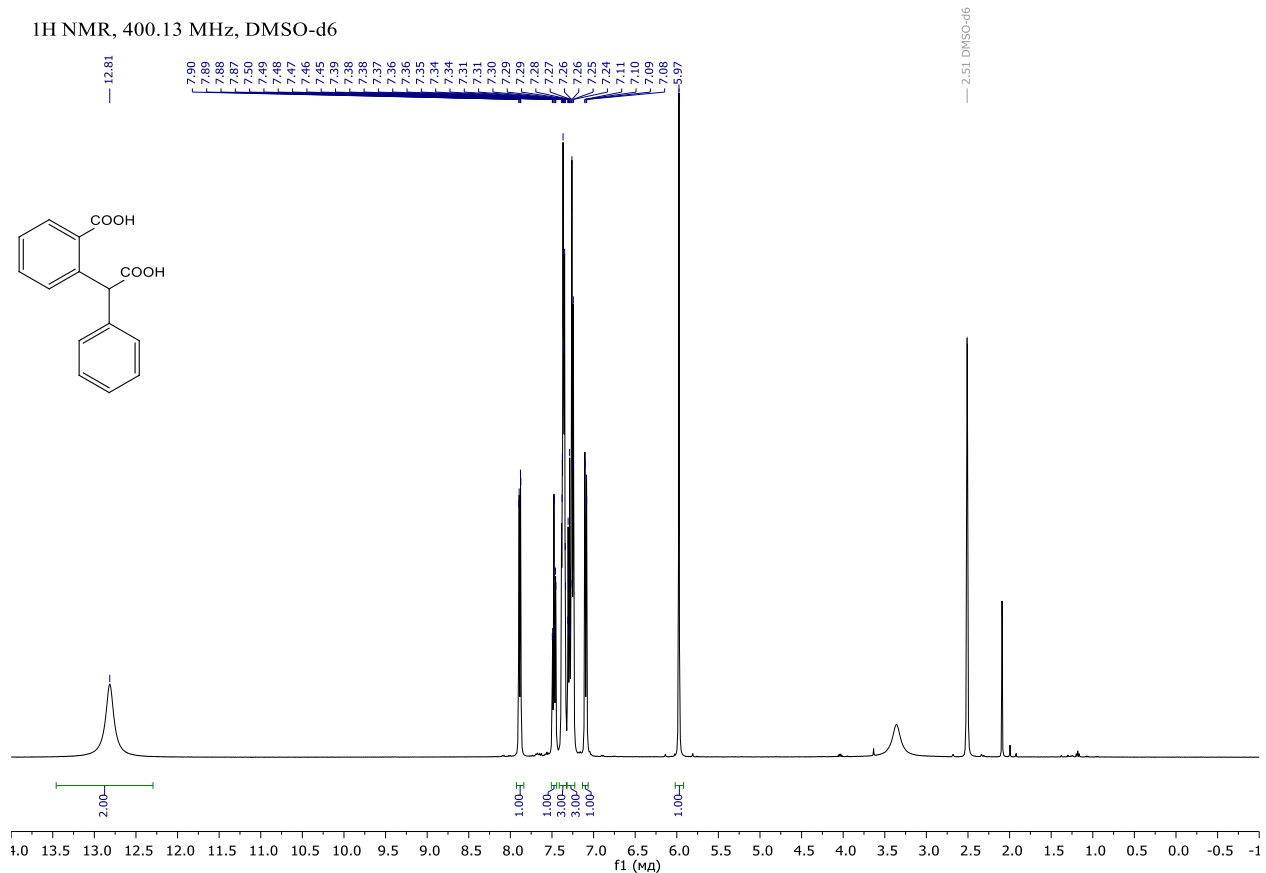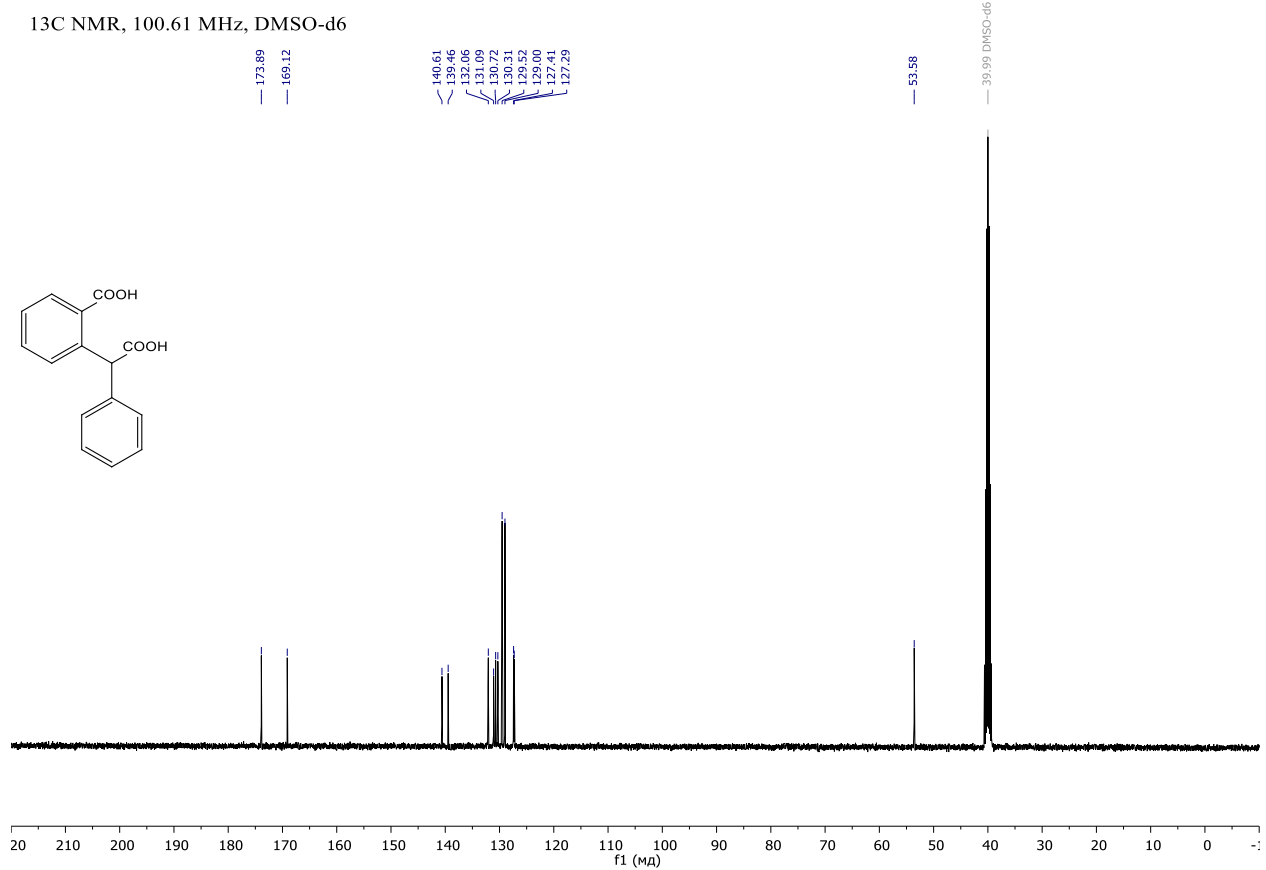

# <sup>1</sup>H and <sup>13</sup>C NMR spectra of compound **10c**

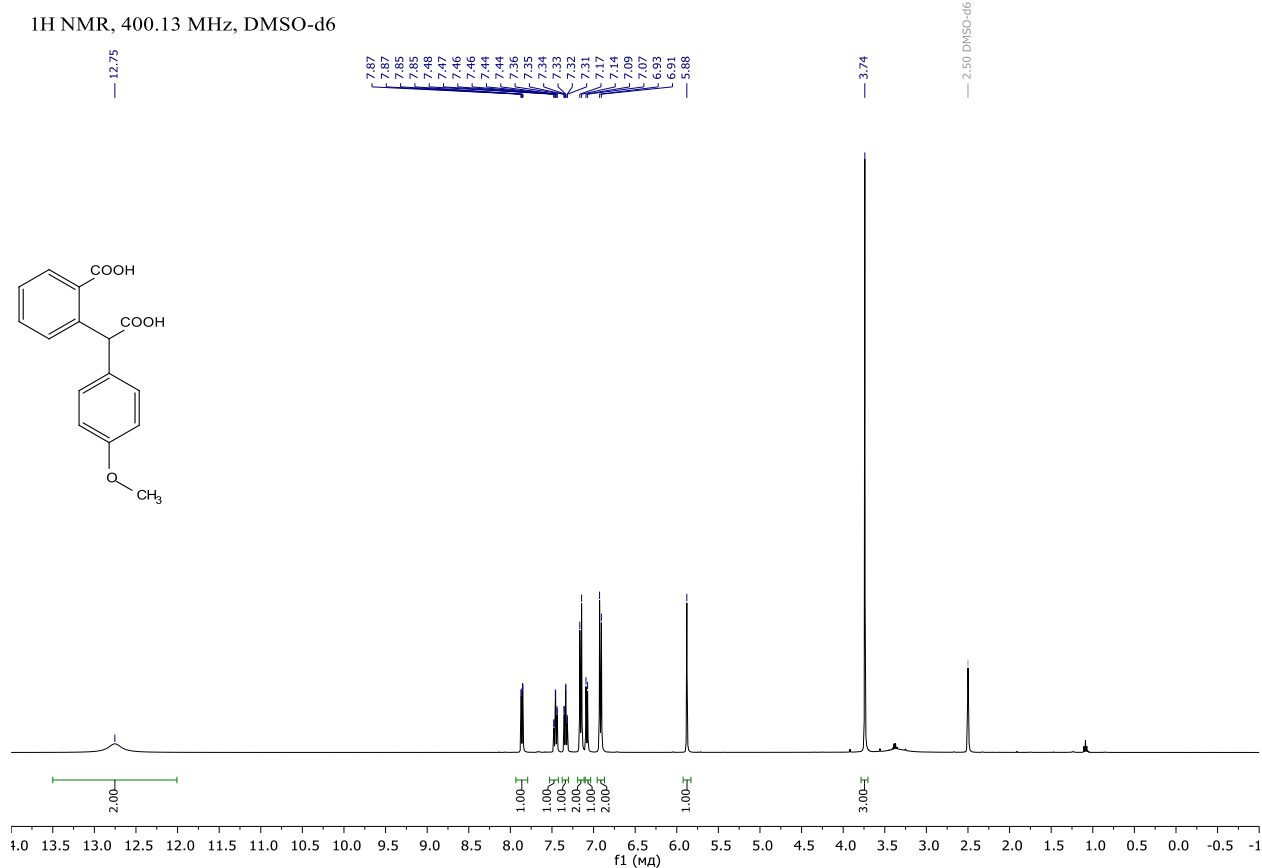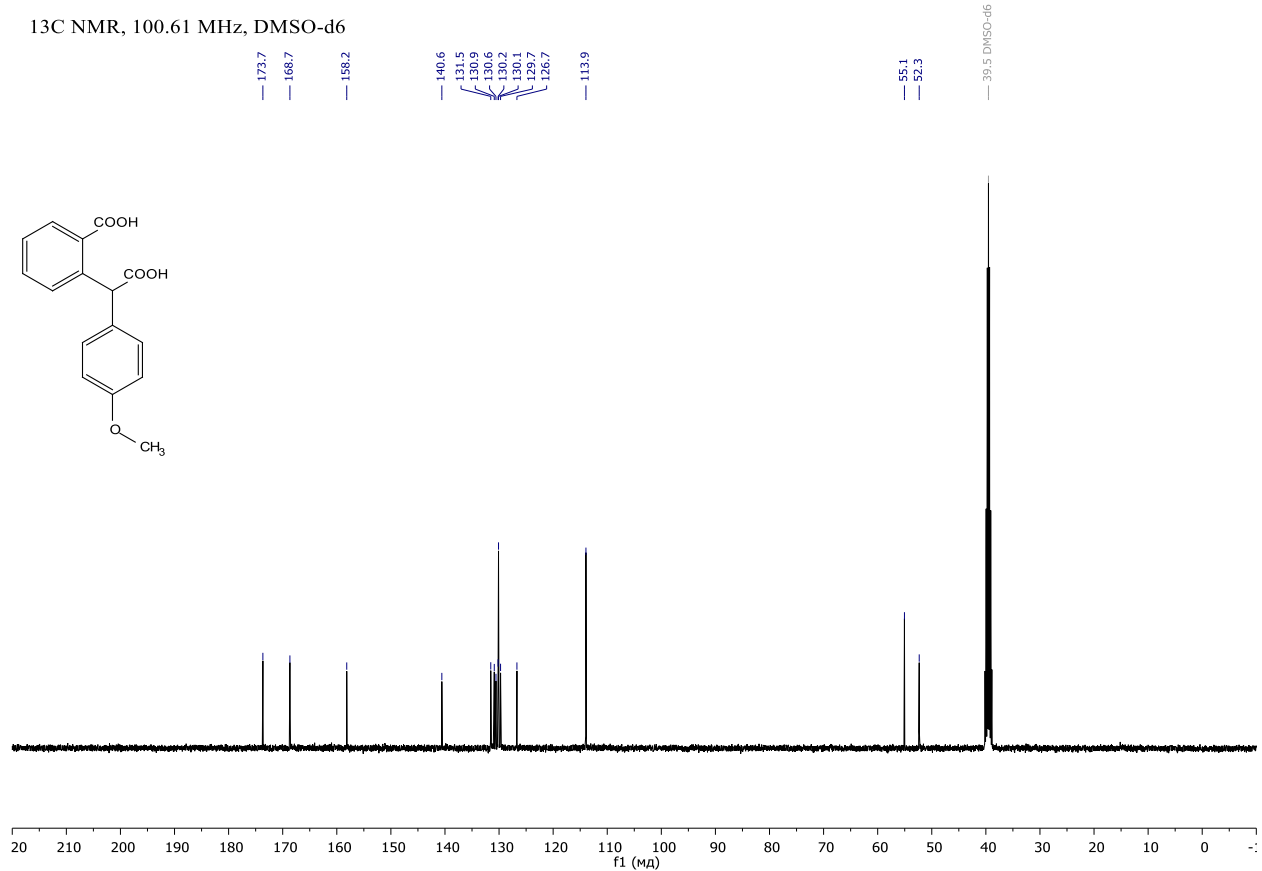

<sup>1</sup>H NMR, 400.13 MHz, DMSO-d<sub>6</sub>

Chemical structure of 2-(4-methylphenyl)-2-phenylpropanoic acid is shown above the spectrum.

Chemical structure: Cc1ccc(cc1)C(C(=O)O)(Cc2ccccc2)C(=O)O

Peak list (ppm): 7.69, 7.69, 7.37, 7.35, 7.35, 7.33, 7.33, 7.33, 7.29, 7.29, 7.29, 7.27, 7.27, 7.26, 7.26, 7.23, 7.23, 7.22, 7.22, 7.21, 7.21, 6.97, 6.99, 5.91, 2.51 DMSO-d<sub>6</sub>, 2.31, 12.71.

Integration values: 1.00, 2.00, 2.00, 2.00, 1.05, 1.00, 3.00.

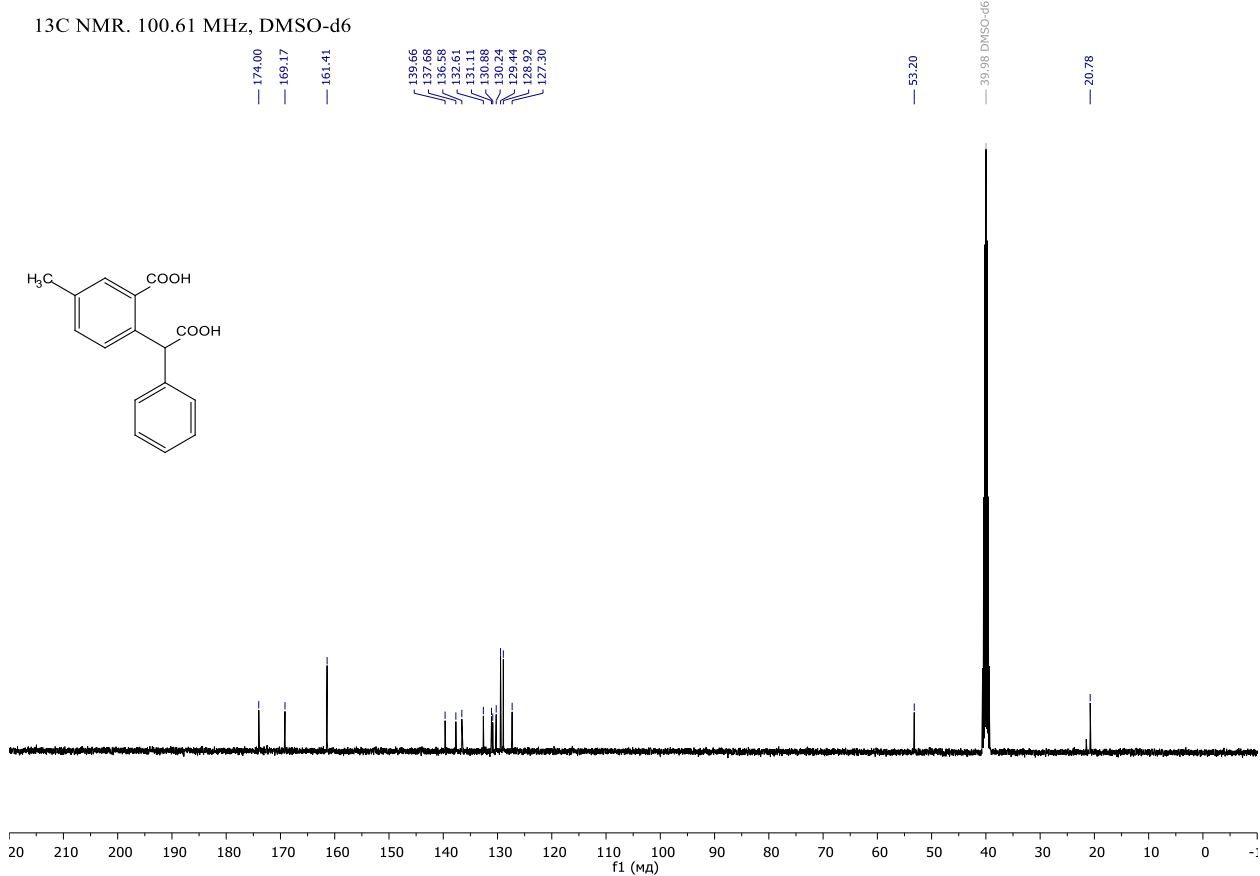

# <sup>1</sup>H, <sup>13</sup>C and <sup>19</sup>F NMR spectra of compound **10e**

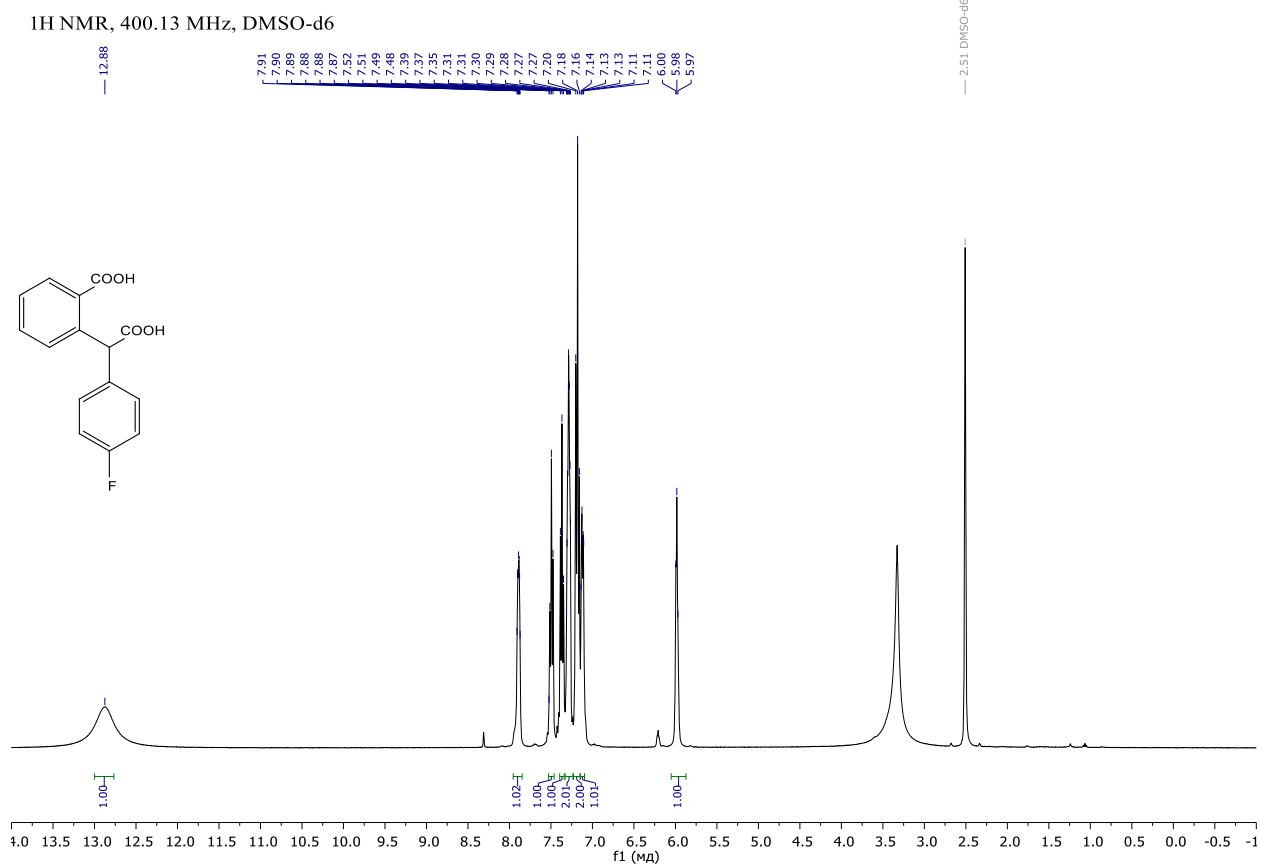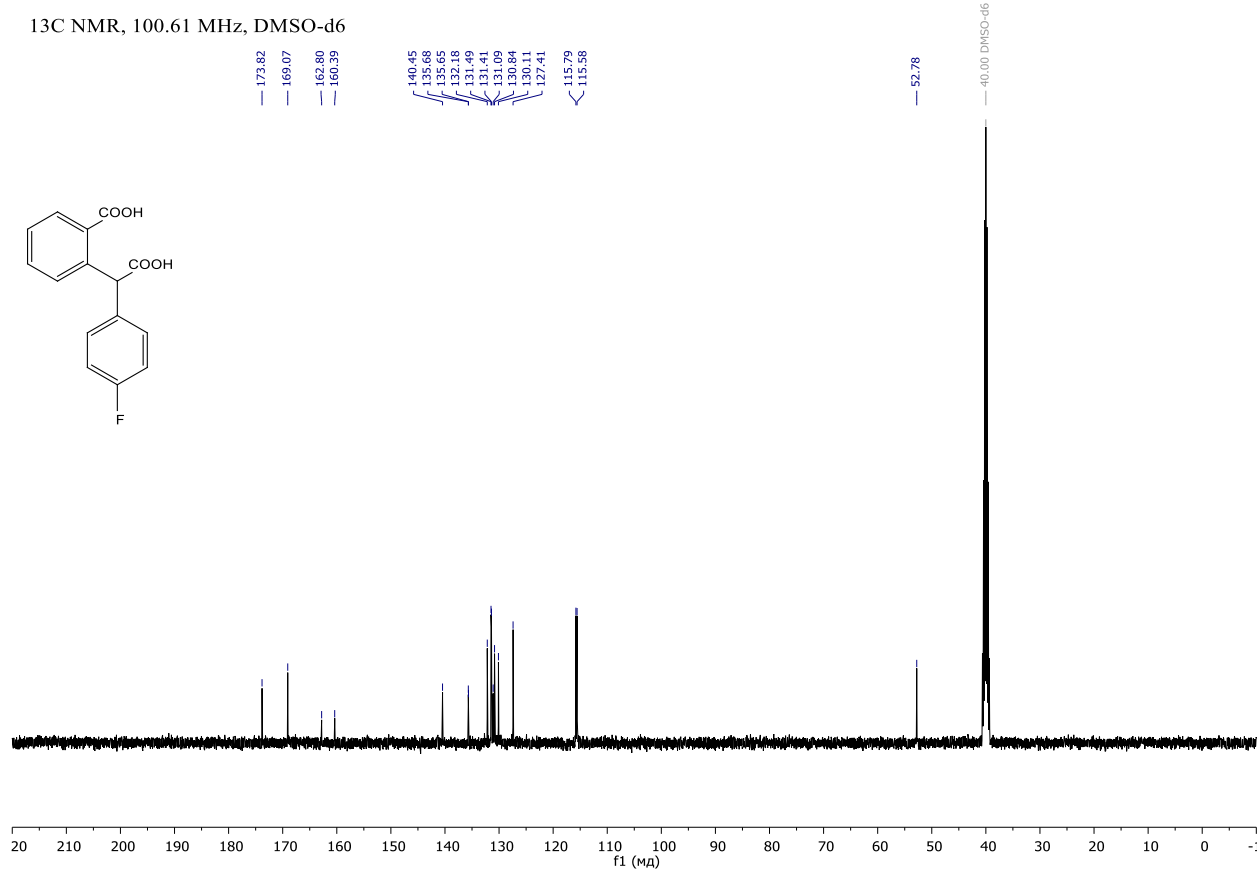

<sup>19</sup>F NMR, 376.49 MHz, DMSO-d<sub>6</sub>

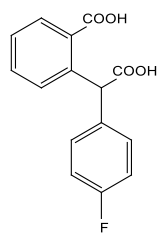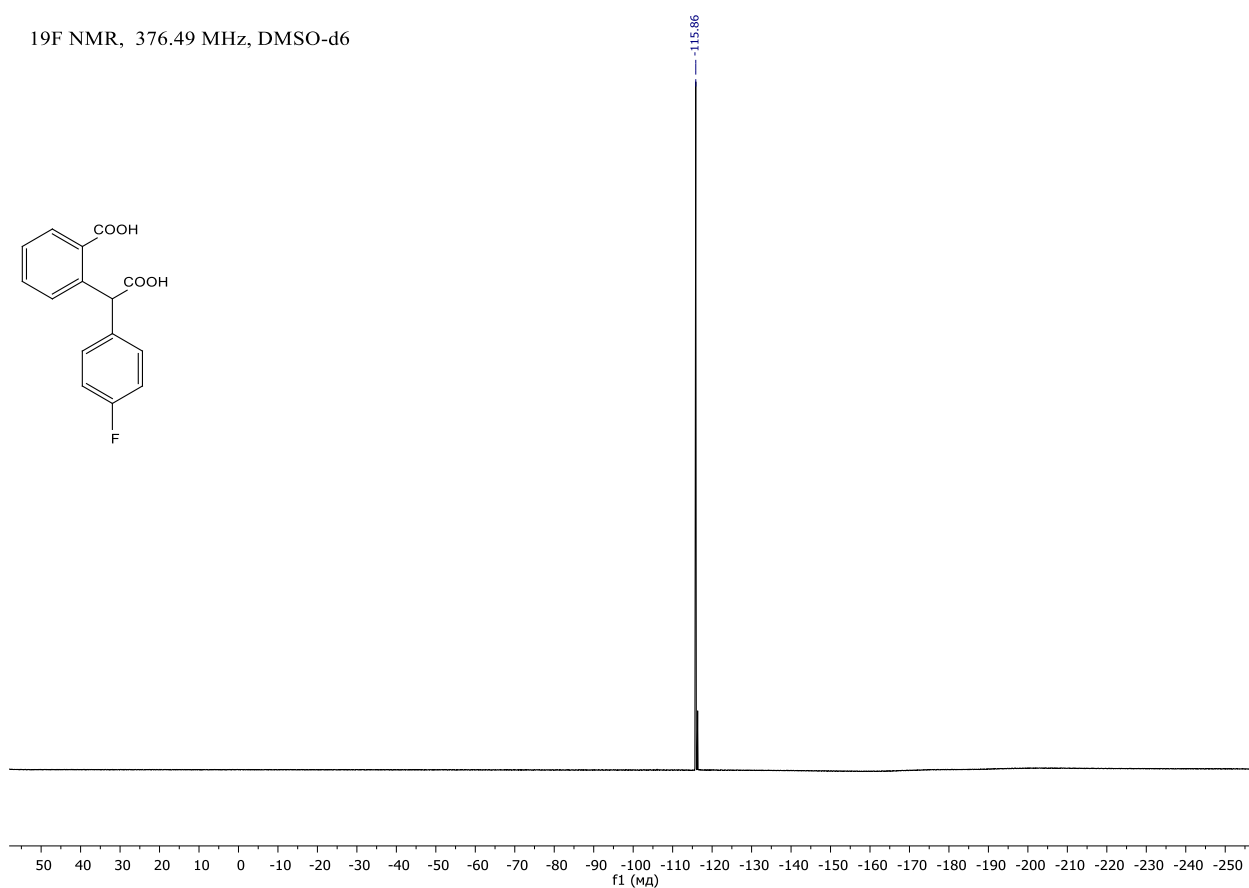

# <sup>1</sup>H and <sup>13</sup>C NMR spectra of compound **10f**

<sup>1</sup>H NMR, 400.13 MHz, DMSO-d<sub>6</sub>

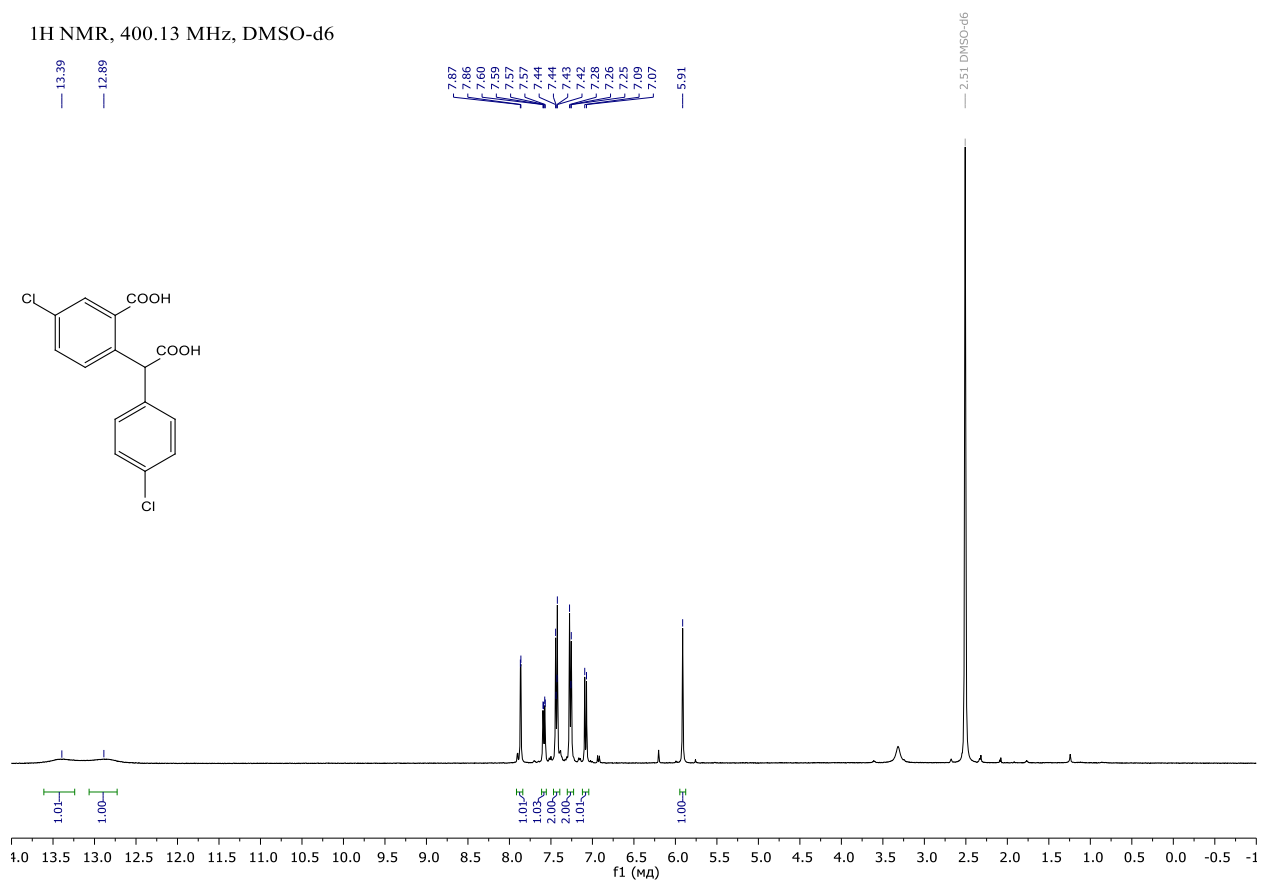

<sup>13</sup>C NMR, 100.61 MHz, DMSO-d<sub>6</sub>

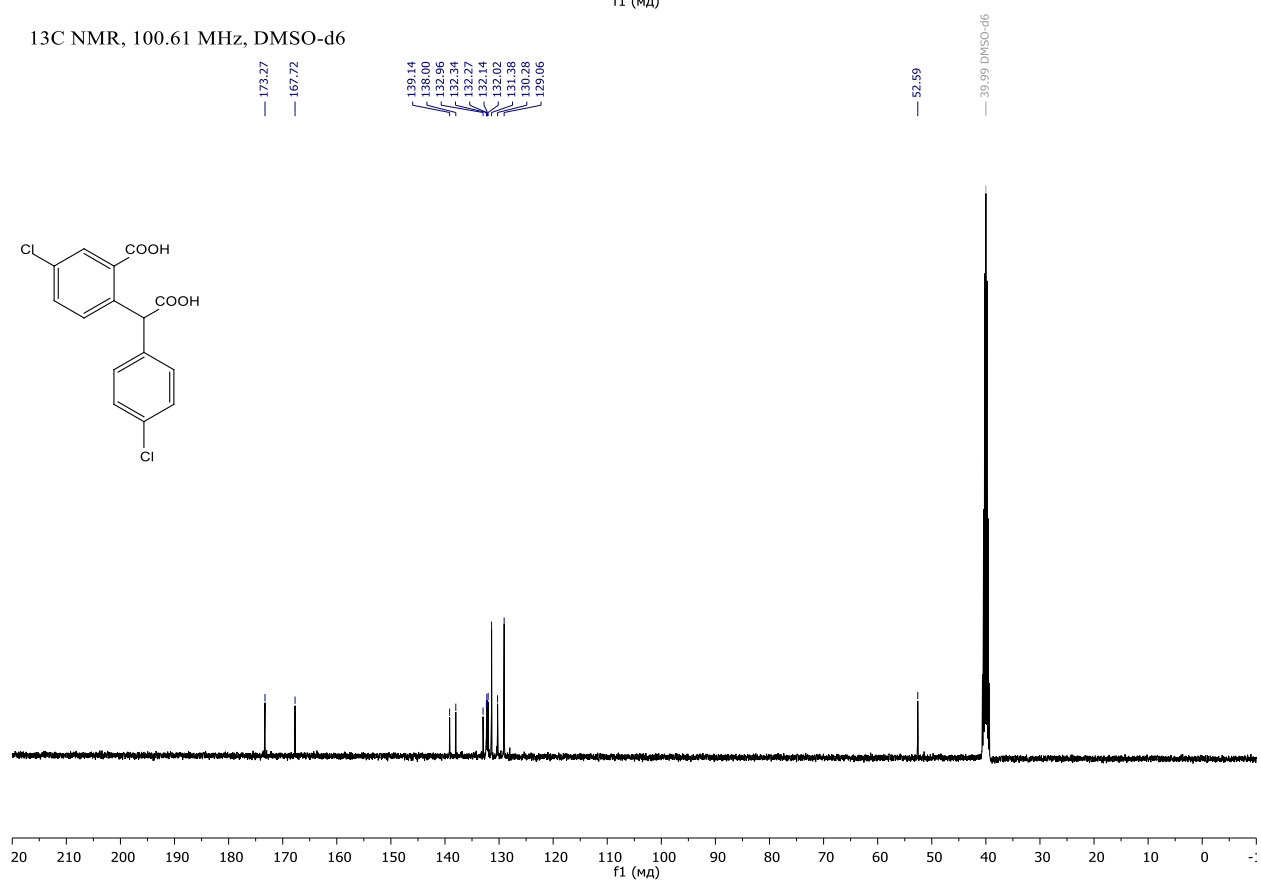



# <sup>1</sup>H and <sup>13</sup>C NMR spectra of compound **9a**

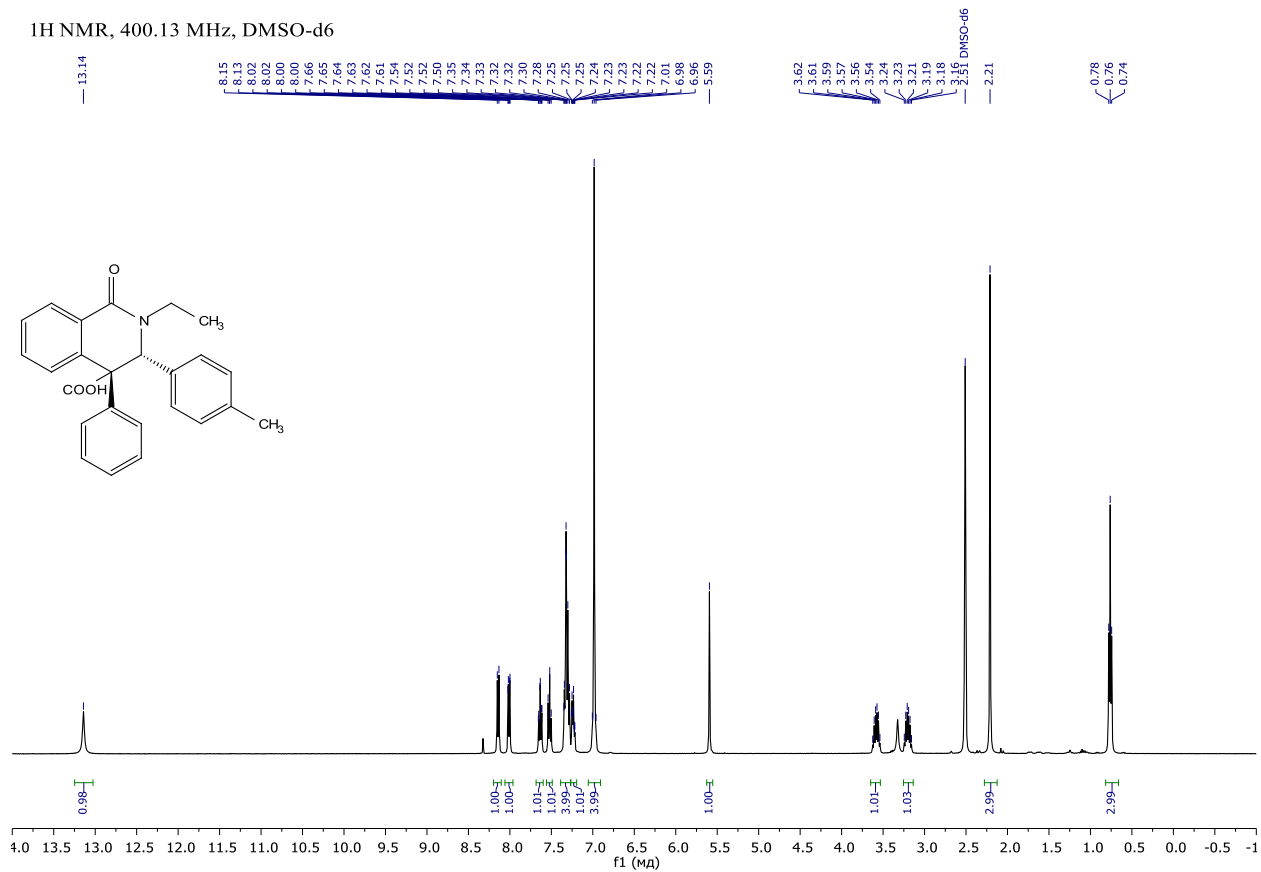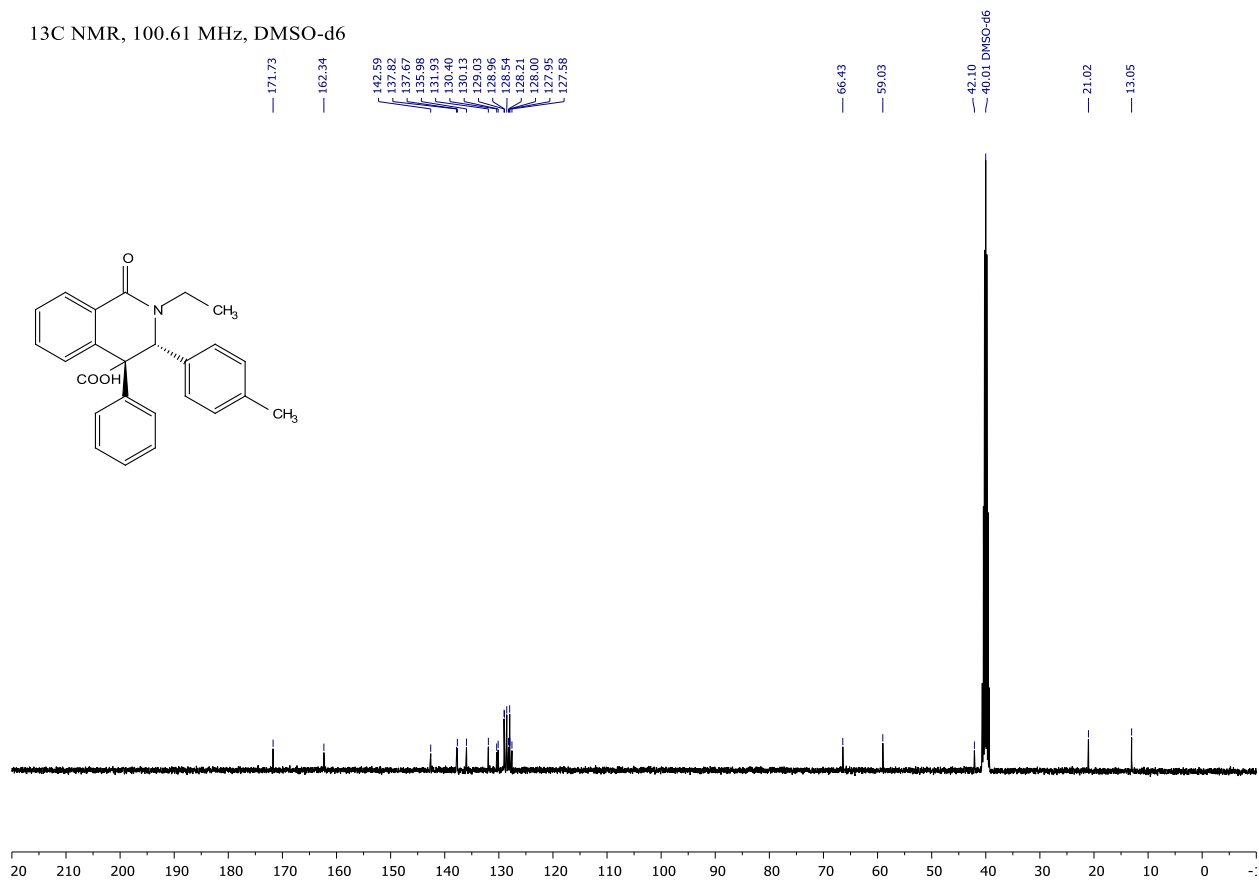

# <sup>1</sup>H and <sup>13</sup>C NMR spectra of compound **9b**

<sup>1</sup>H NMR, 400.13 MHz, DMSO-d<sub>6</sub>

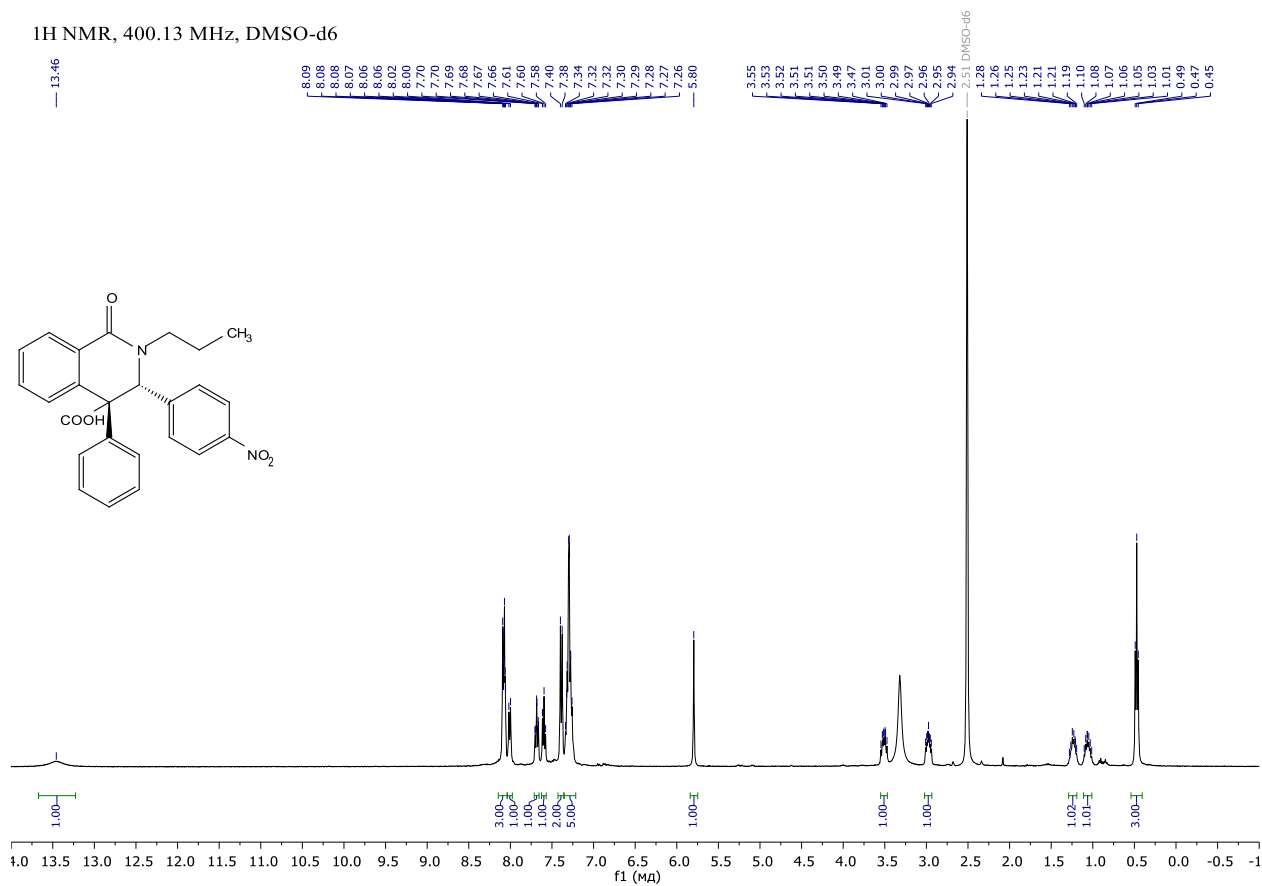

<sup>13</sup>C NMR, 100.61 MHz, DMSO-d<sub>6</sub>

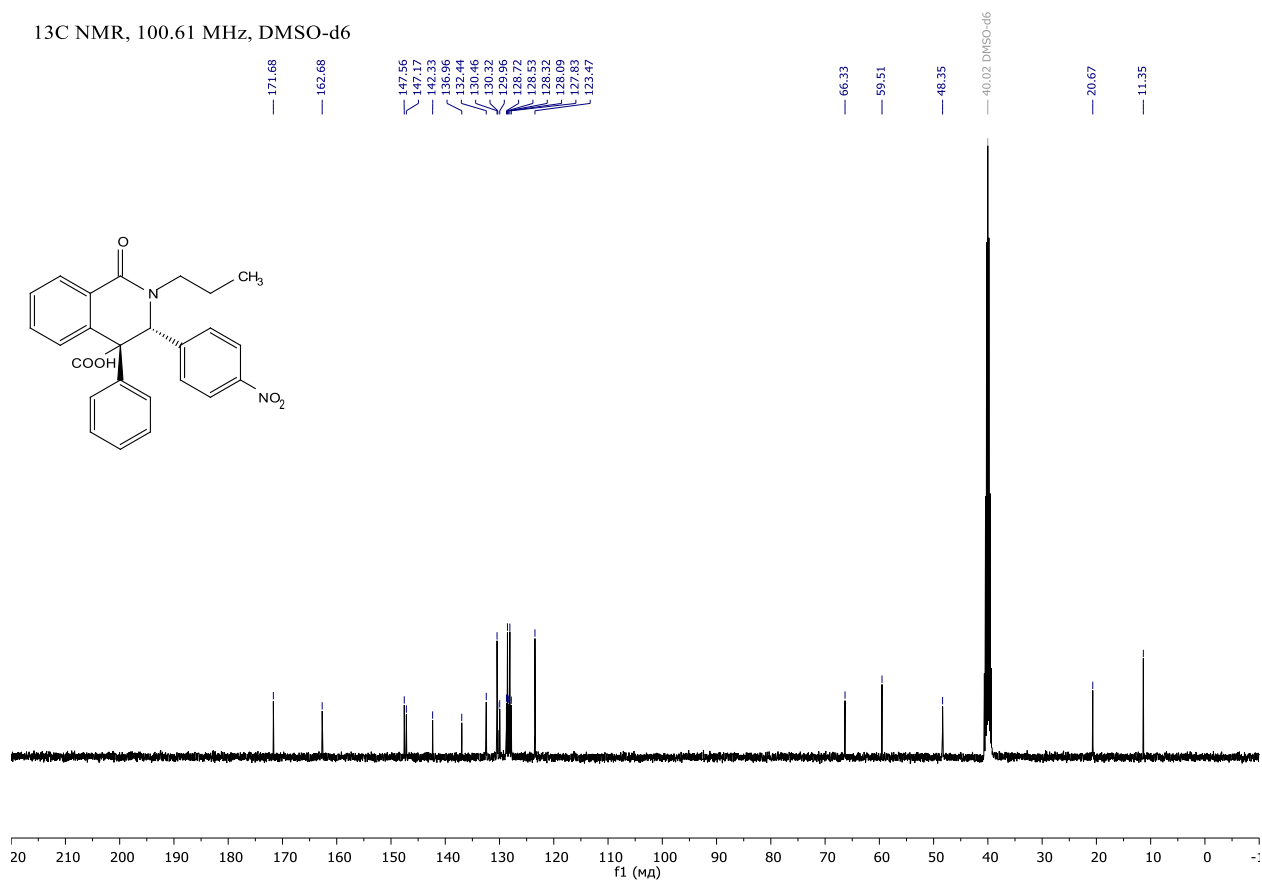

# <sup>1</sup>H and <sup>13</sup>C NMR spectra of compound **9c**

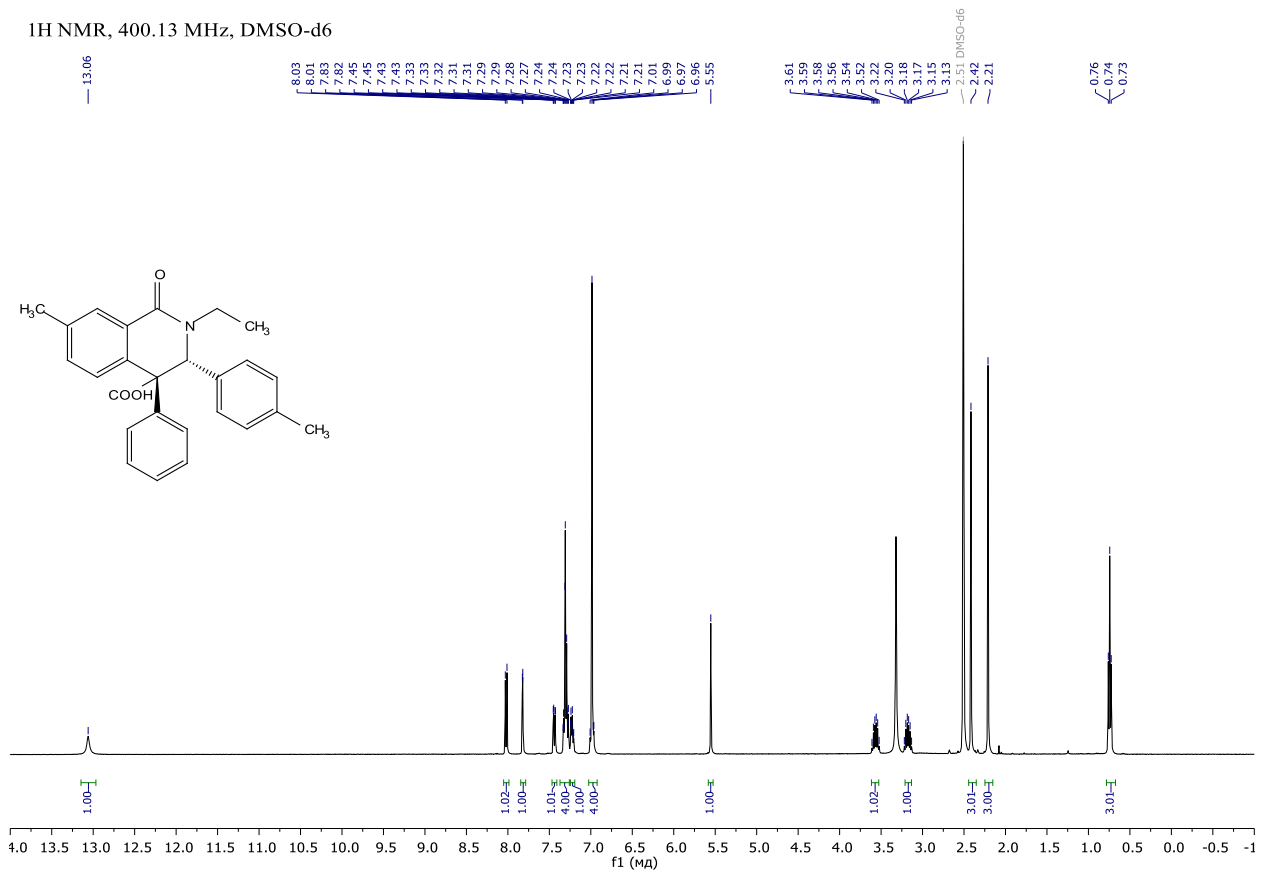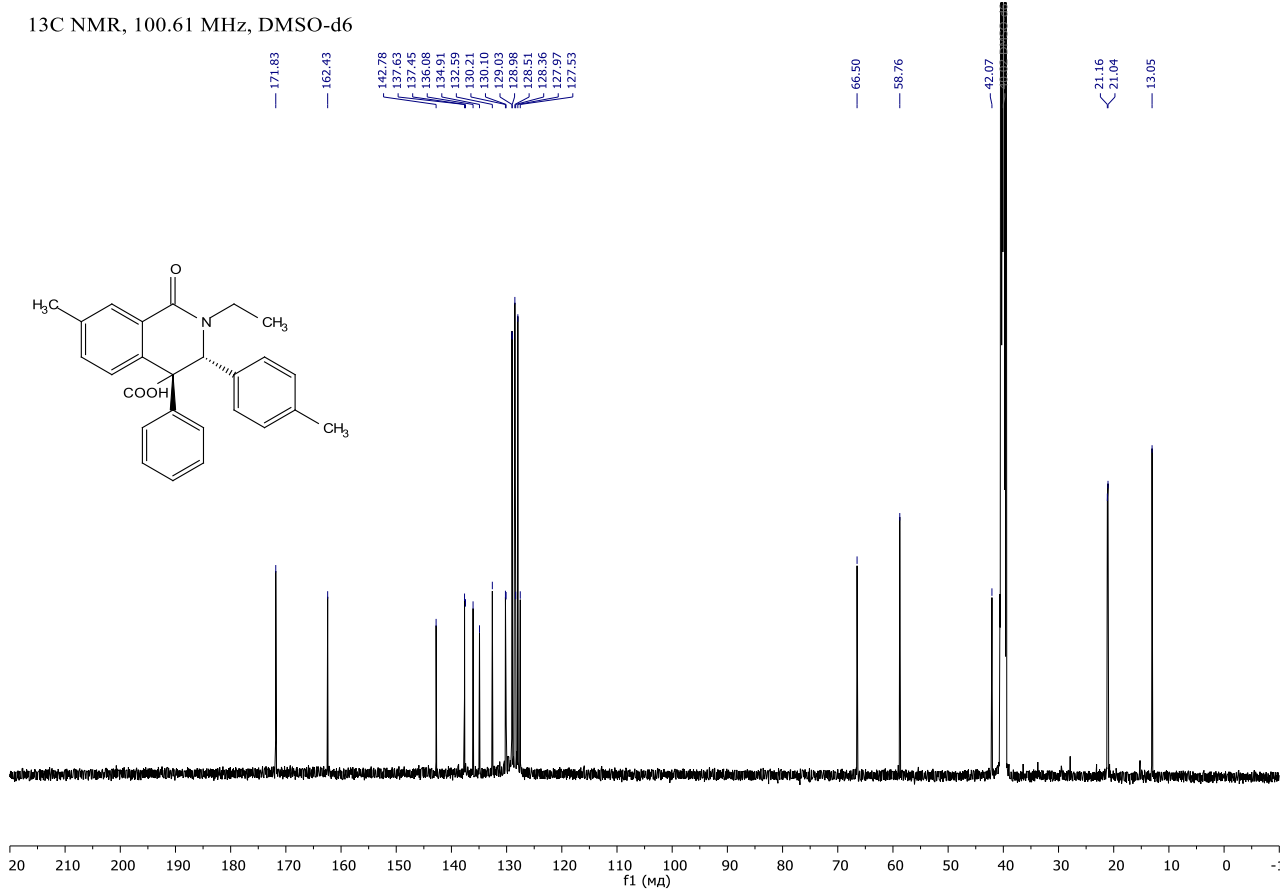

# <sup>1</sup>H and <sup>13</sup>C NMR spectra of compound **9d**

<sup>1</sup>H NMR, 400.13 MHz, DMSO-d<sub>6</sub>

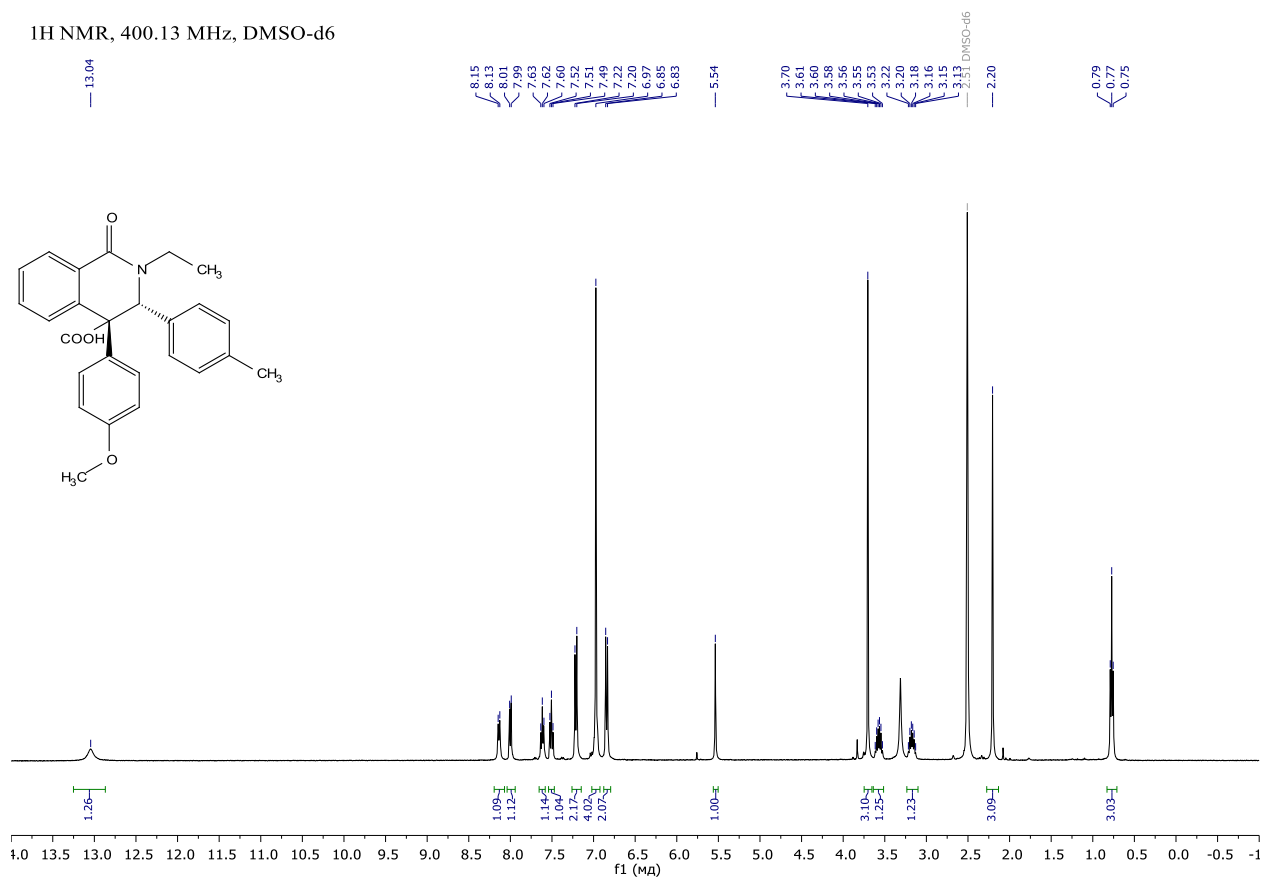

<sup>13</sup>C NMR, 100.61 MHz, DMSO-d<sub>6</sub>

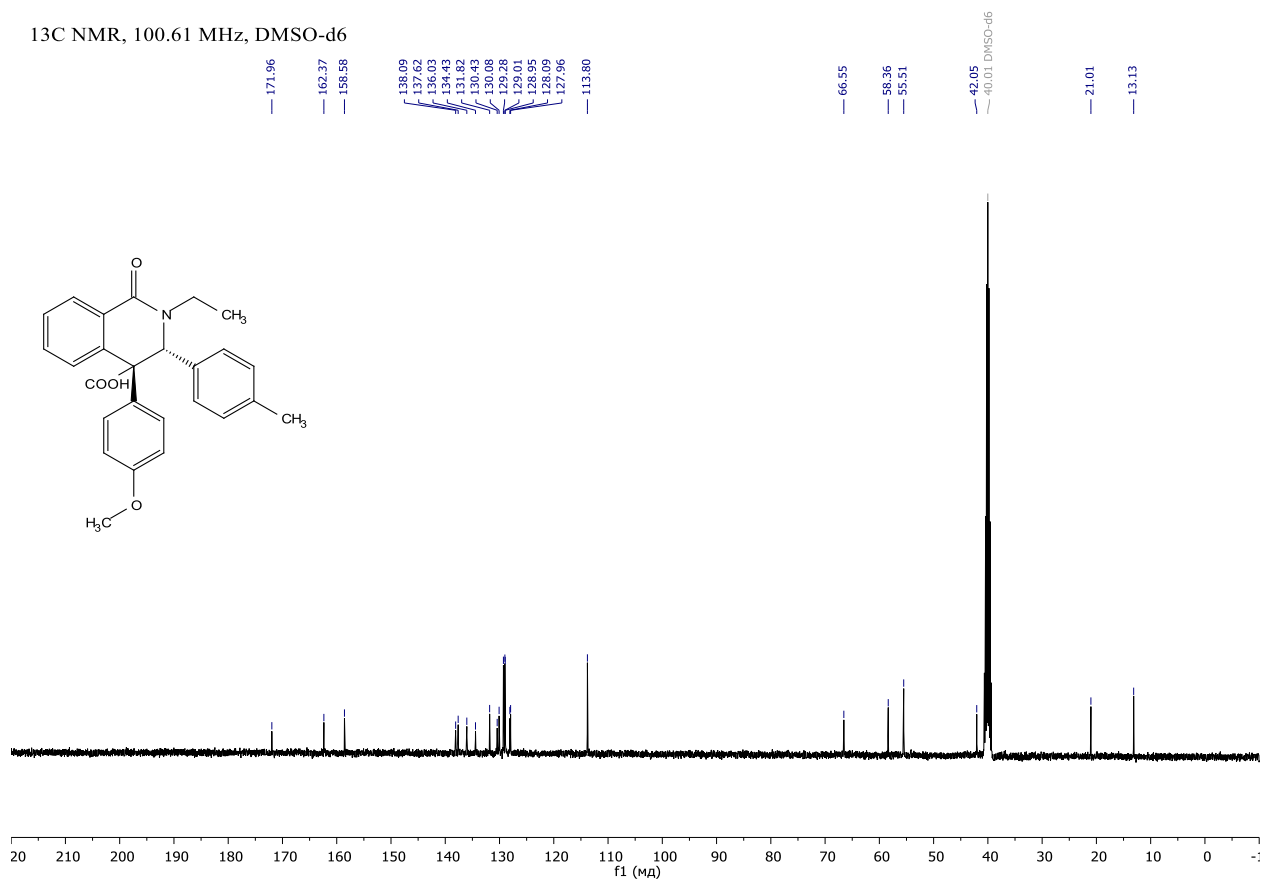

# <sup>1</sup>H and <sup>13</sup>C NMR spectra of compound **9e**

<sup>1</sup>H NMR, 400.13 MHz, DMSO-d<sub>6</sub>

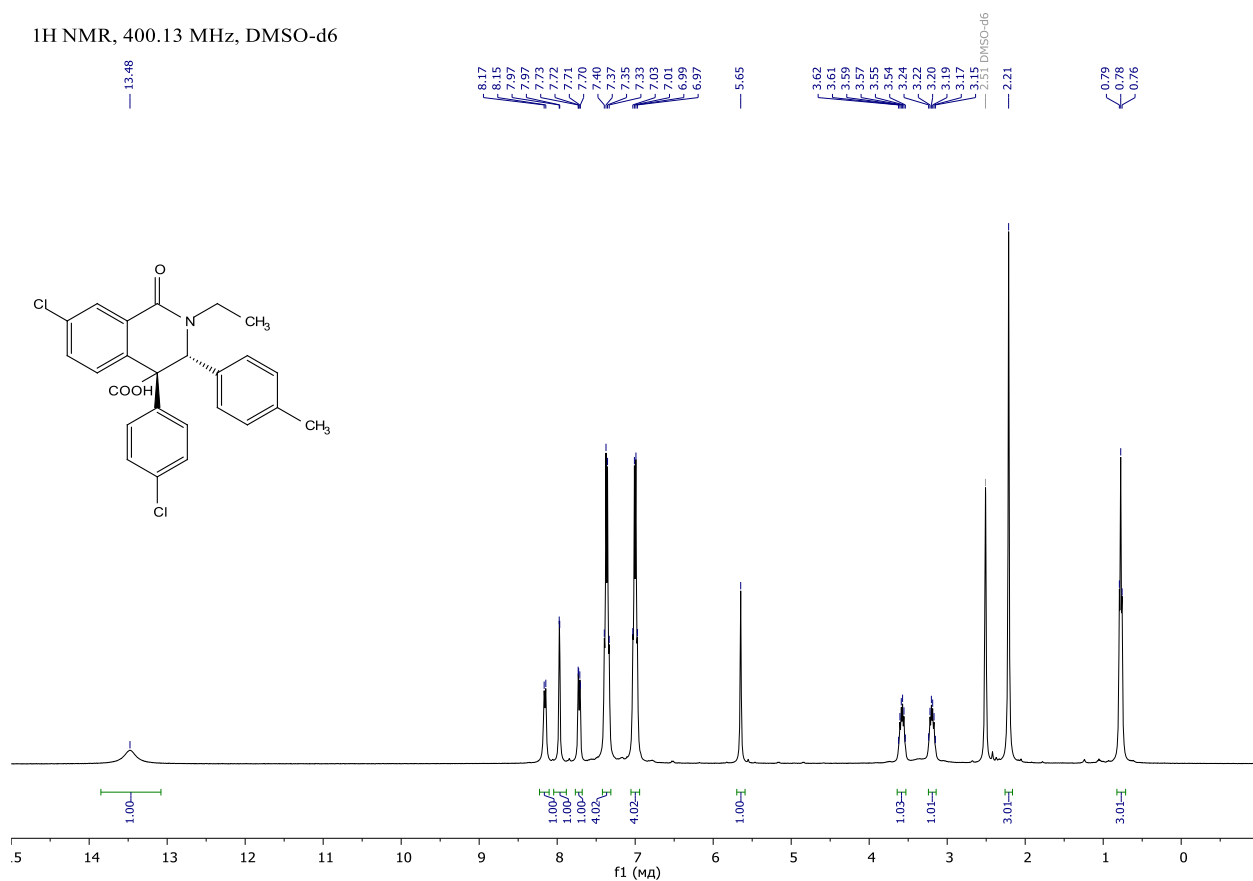

<sup>13</sup>C NMR, 100.61 MHz, DMSO-d<sub>6</sub>

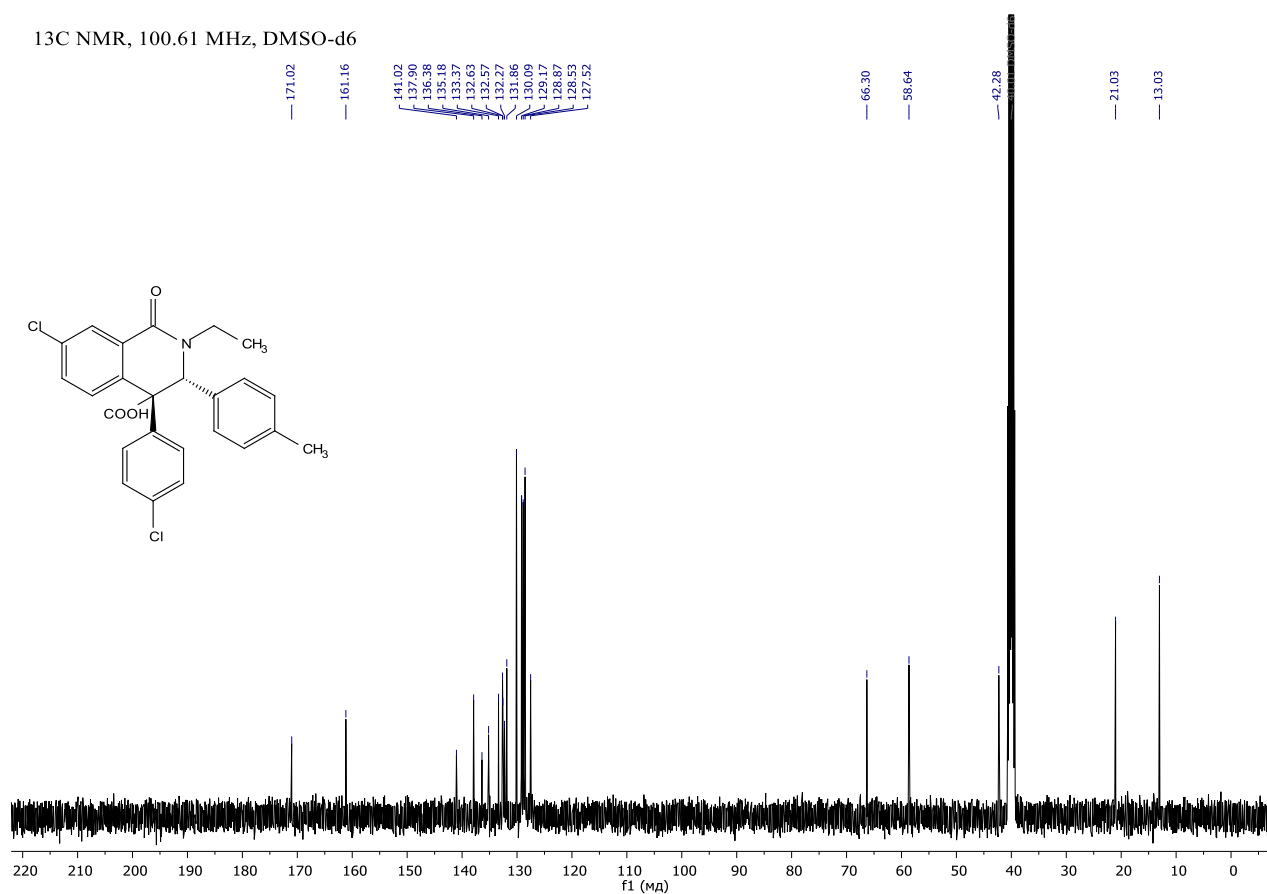

<sup>1</sup>H NMR, 400.13 MHz, DMSO-d<sub>6</sub>

Chemical structure of compound 10 is shown. The structure is a benzimidazole derivative with a 4-chlorophenyl group, a 4-methoxybenzyl group, and a 4-benzyl-2-methoxyphenyl group.

<sup>1</sup>H NMR spectrum (400.13 MHz, DMSO-d<sub>6</sub>) showing peaks at 13.37, 7.32, 7.33, 7.34, 7.38, 7.39, 7.41, 7.43, 7.46, 7.52, 7.54, 7.56, 7.67, 7.69, 7.70, 7.83, 6.88, 6.86, 6.65, 6.64, 6.55, 6.53, 5.75, 4.98, 4.67, 4.63, 3.79, 3.75, 3.51, and 2.51 ppm. Integration values are shown below the peaks: 1.00, 1.00, 1.02, 11.00, 1.00, 1.00, 1.00, 1.00, 2.00, 1.00, 1.00, 3.01, 3.01, and 2.51.

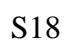

$^1\text{H}$  and  $^{13}\text{C}$  NMR spectra of compound **9g**<sup>1</sup>H NMR, 400.13 MHz, DMSO-d<sub>6</sub>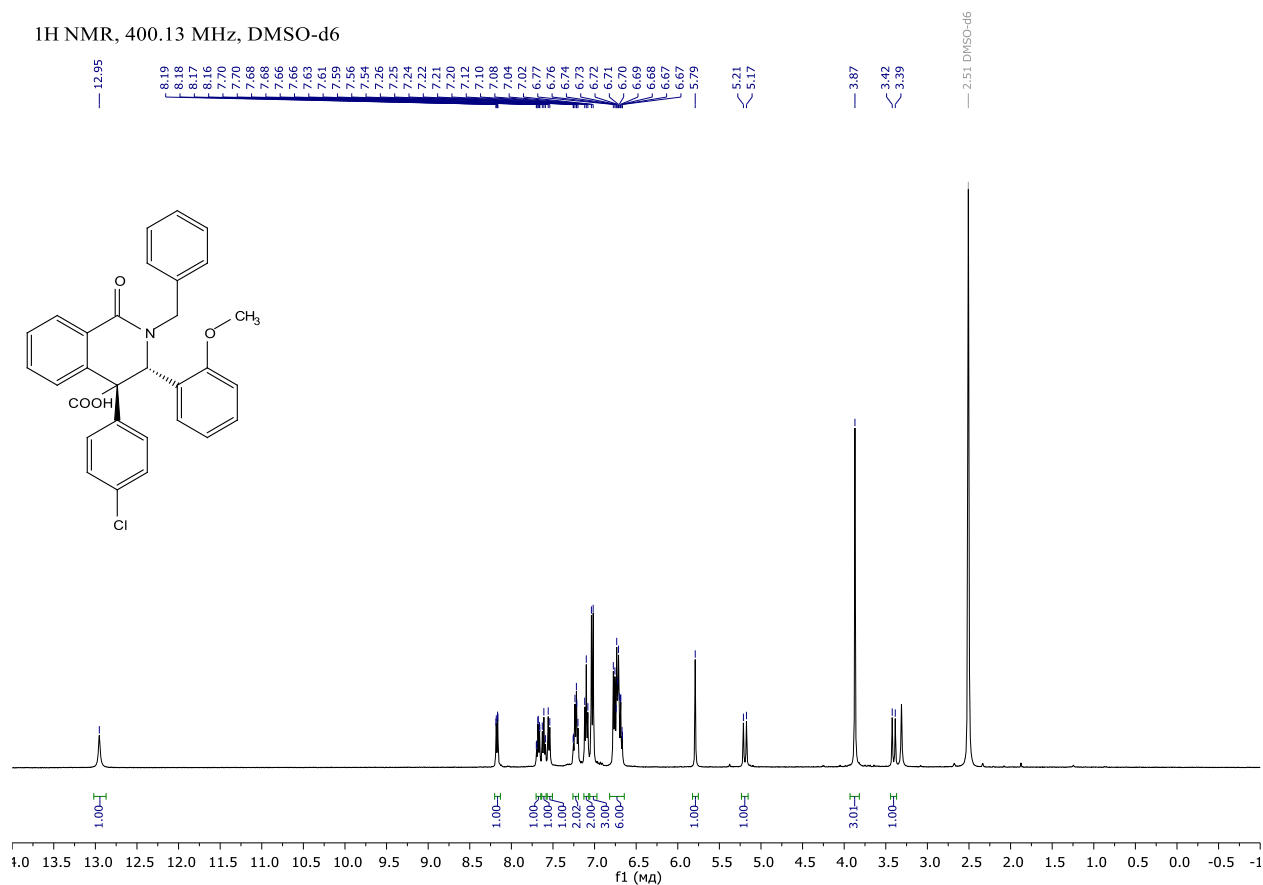

<sup>13</sup>C NMR, 100.61 MHz, DMSO-d<sub>6</sub>

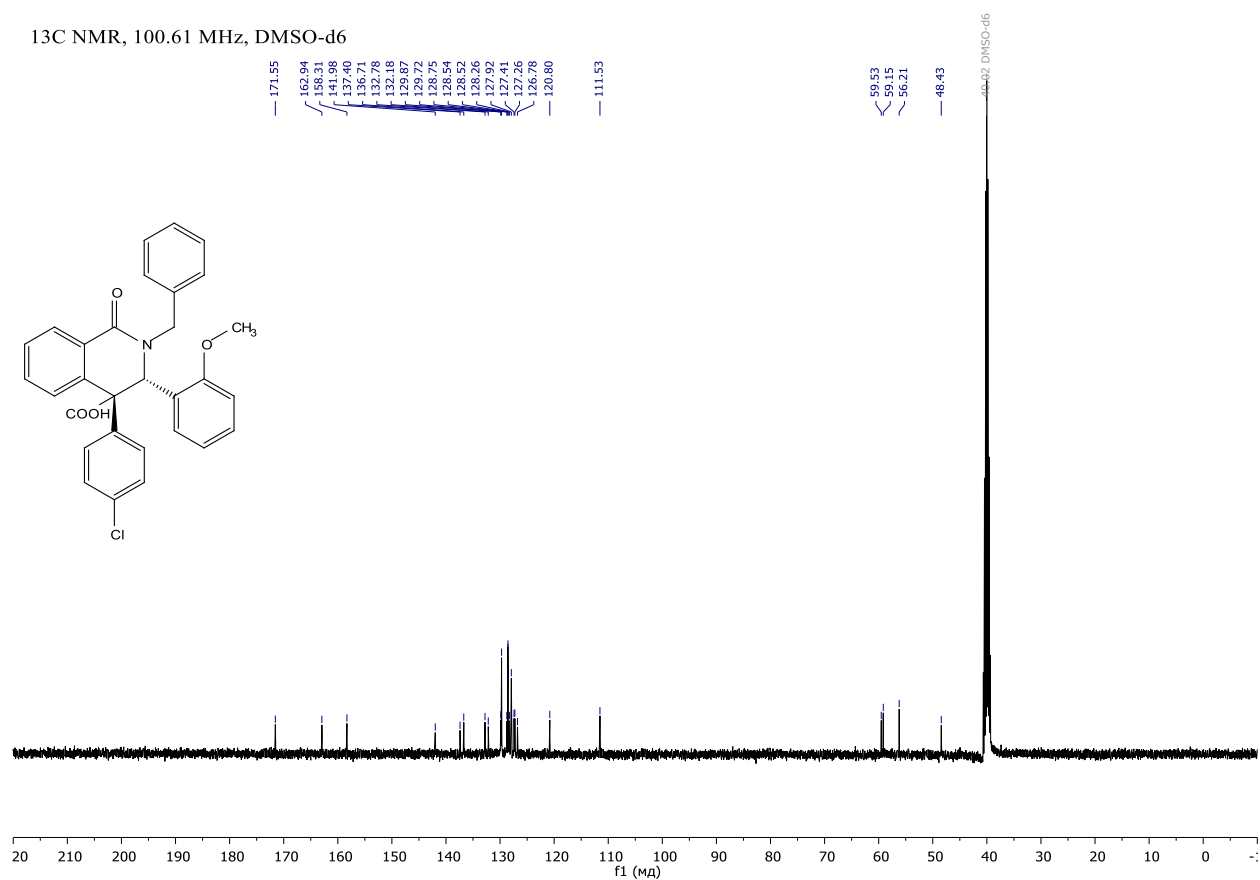

# <sup>1</sup>H and <sup>13</sup>C NMR spectra of compound **9h**

<sup>1</sup>H NMR, 400.13 MHz, DMSO-d<sub>6</sub>

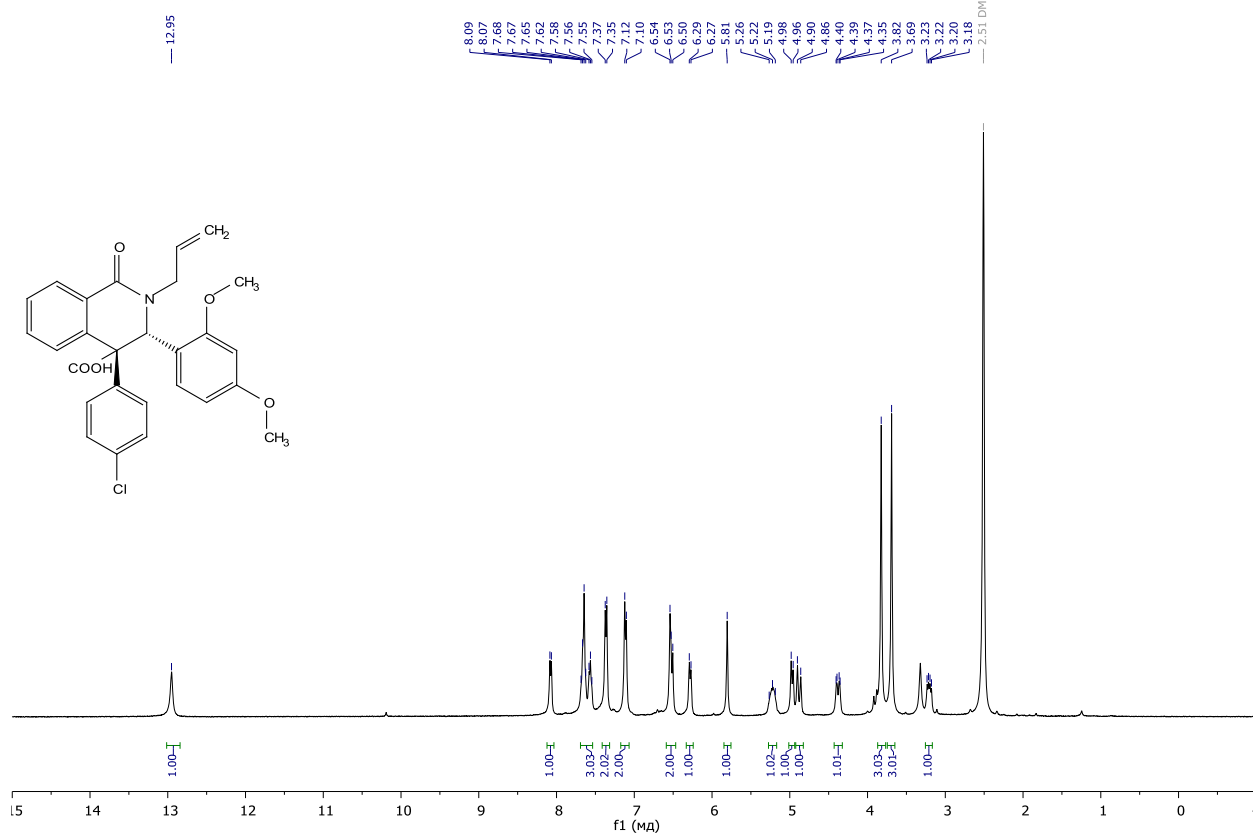

<sup>13</sup>C NMR, 125.73 MHz, DMSO-d<sub>6</sub>

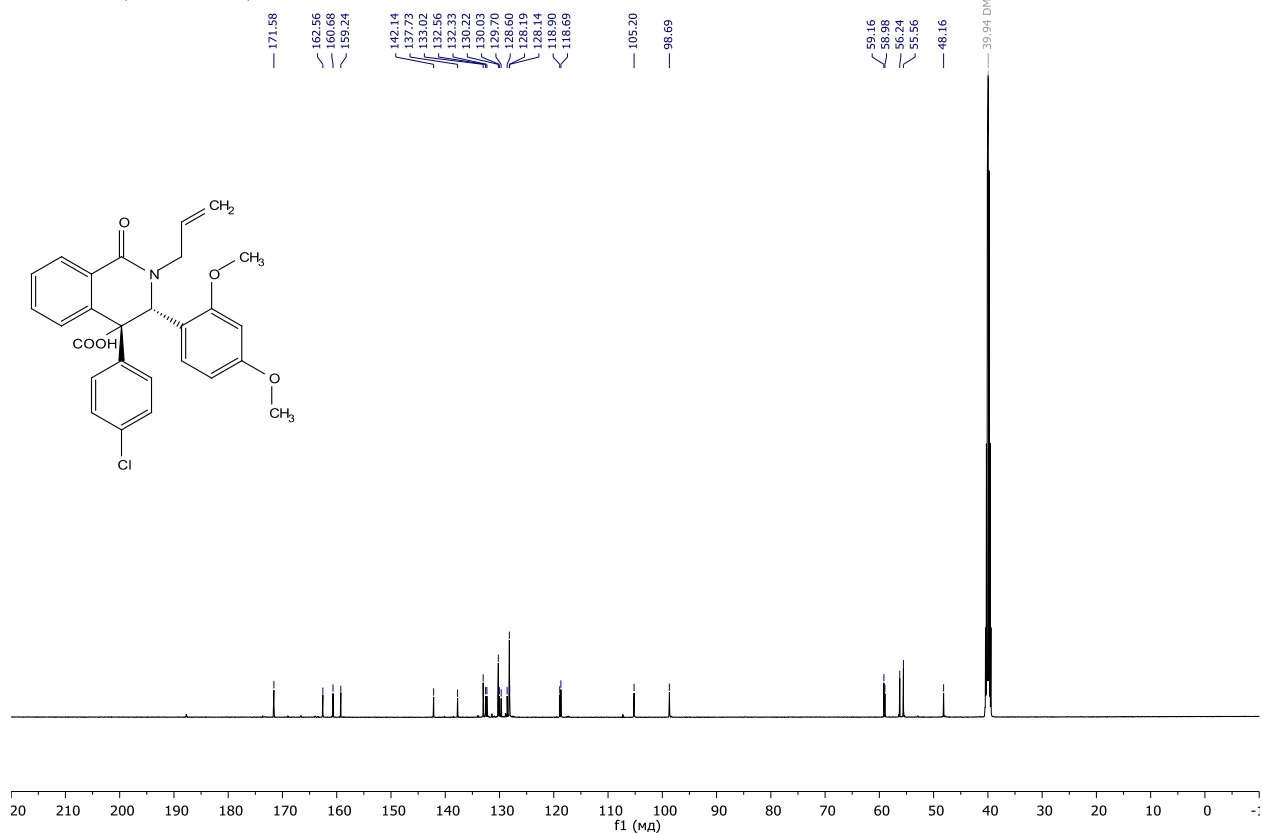



# <sup>1</sup>H and <sup>13</sup>C NMR spectra of compound **9i**

<sup>1</sup>H NMR, 400.13 MHz, DMSO-d<sub>6</sub>

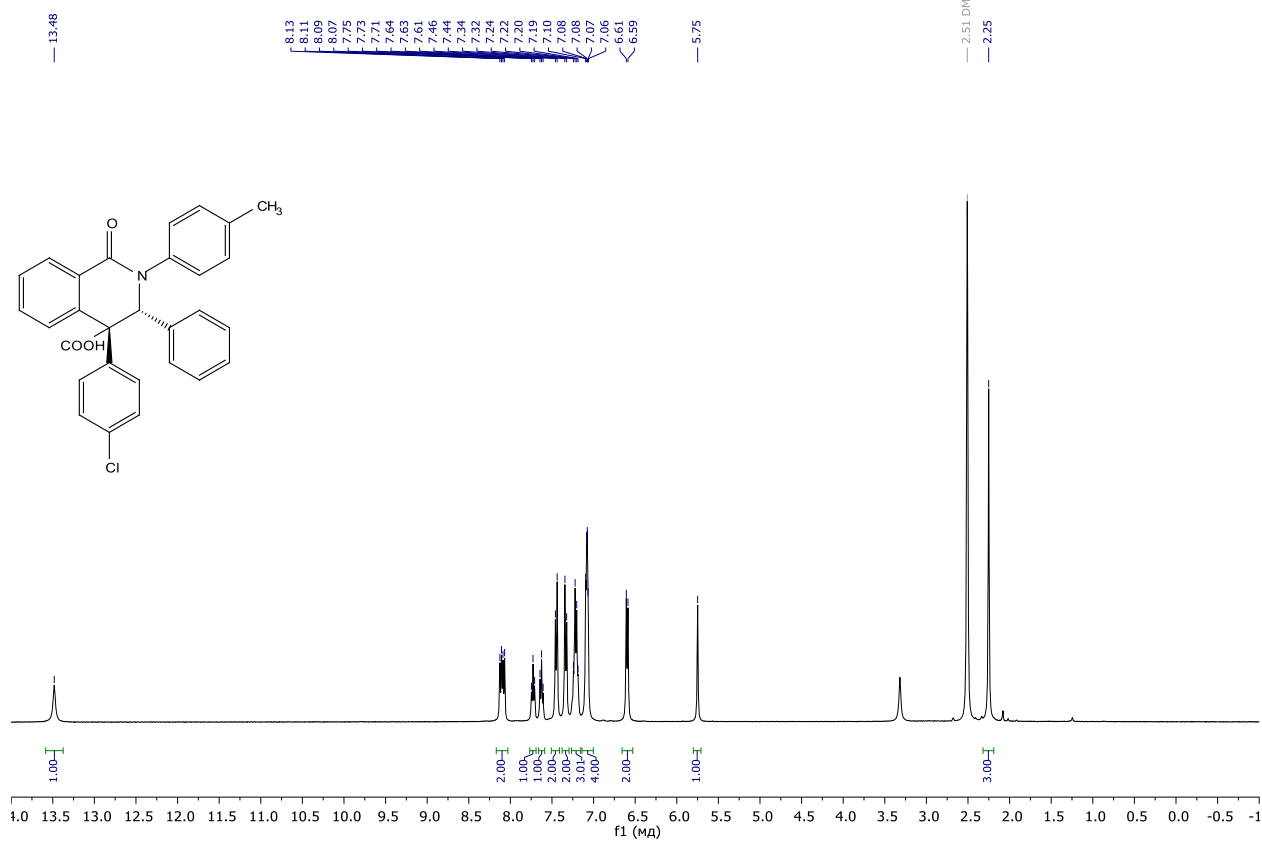

<sup>13</sup>C NMR, 125.73 MHz, DMSO-d<sub>6</sub>

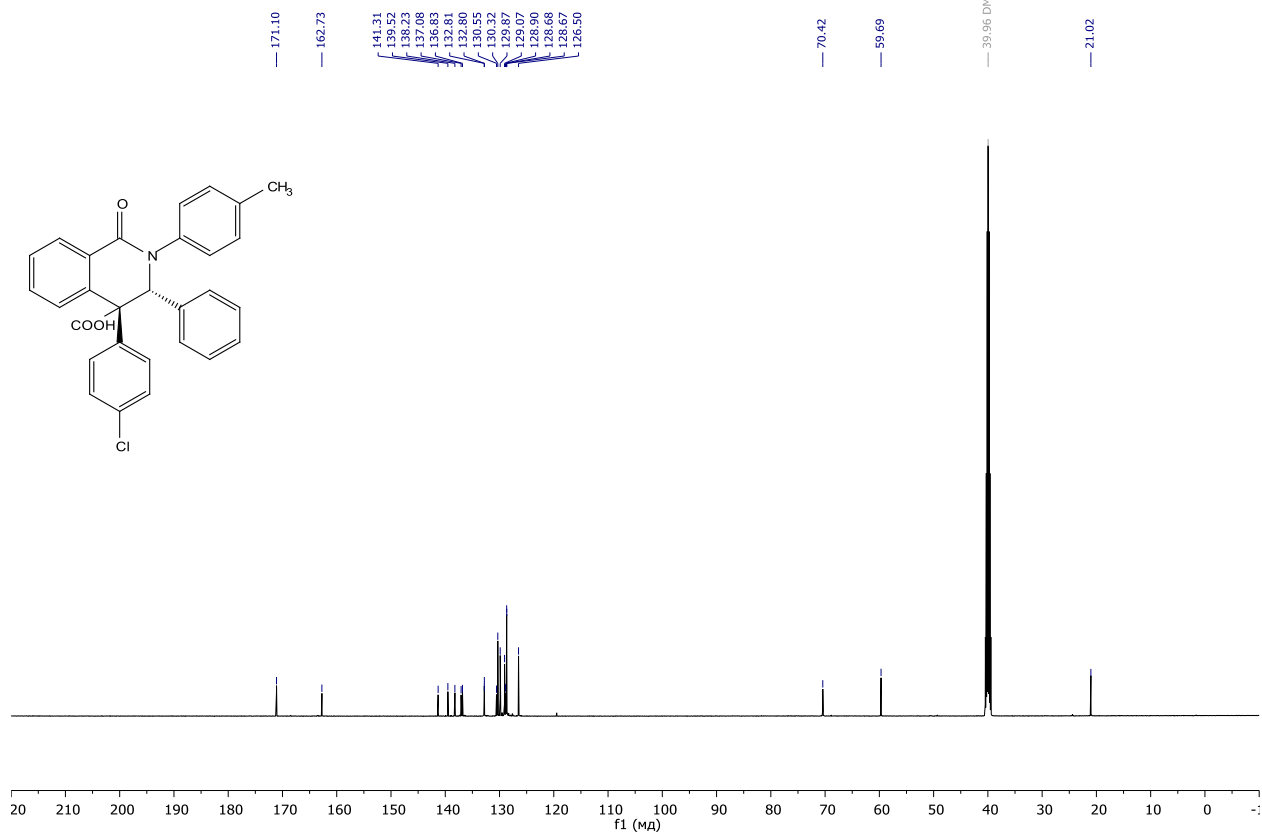

# <sup>1</sup>H, <sup>13</sup>C and <sup>19</sup>F NMR spectra of compound **9j**

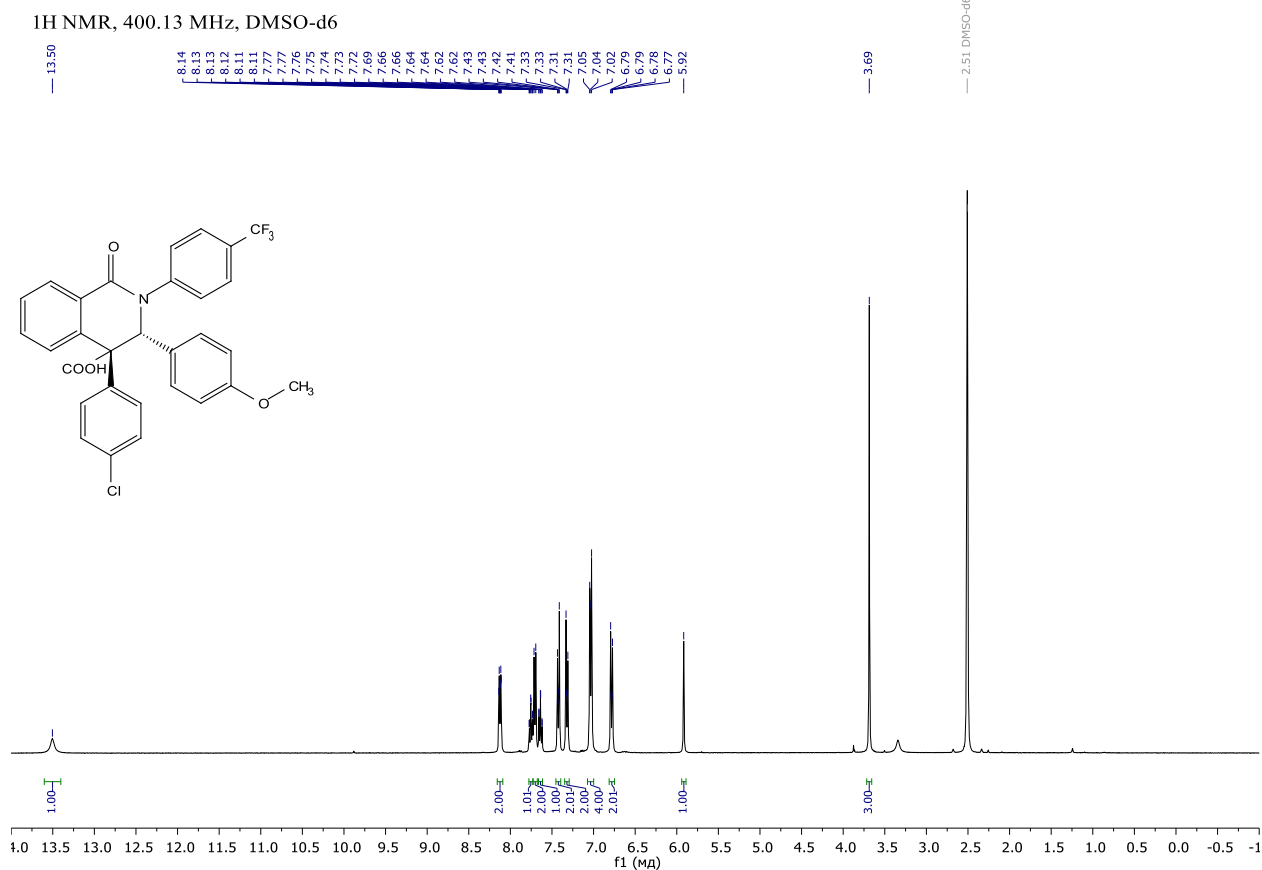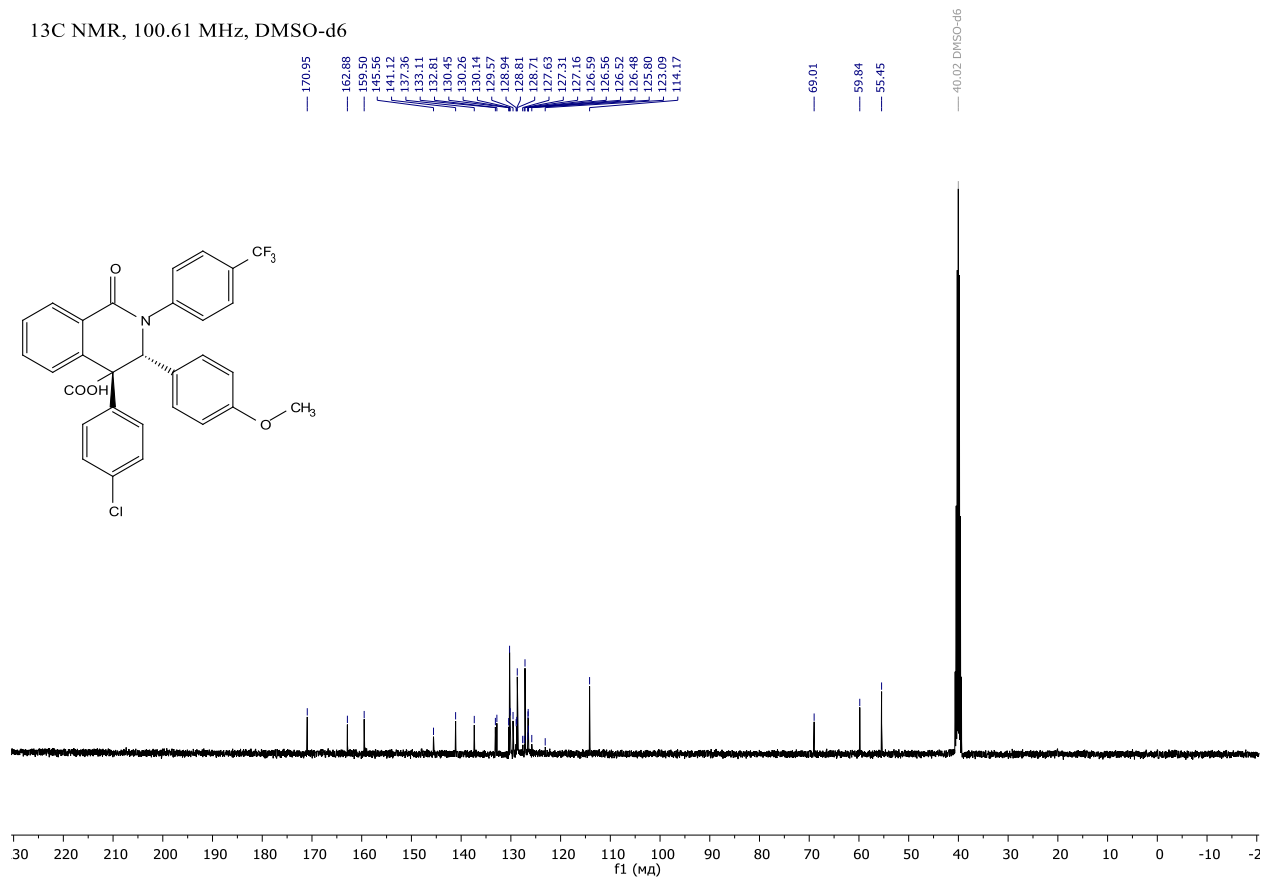

<sup>19</sup>F NMR, 376.49 MHz, DMSO-d<sub>6</sub>

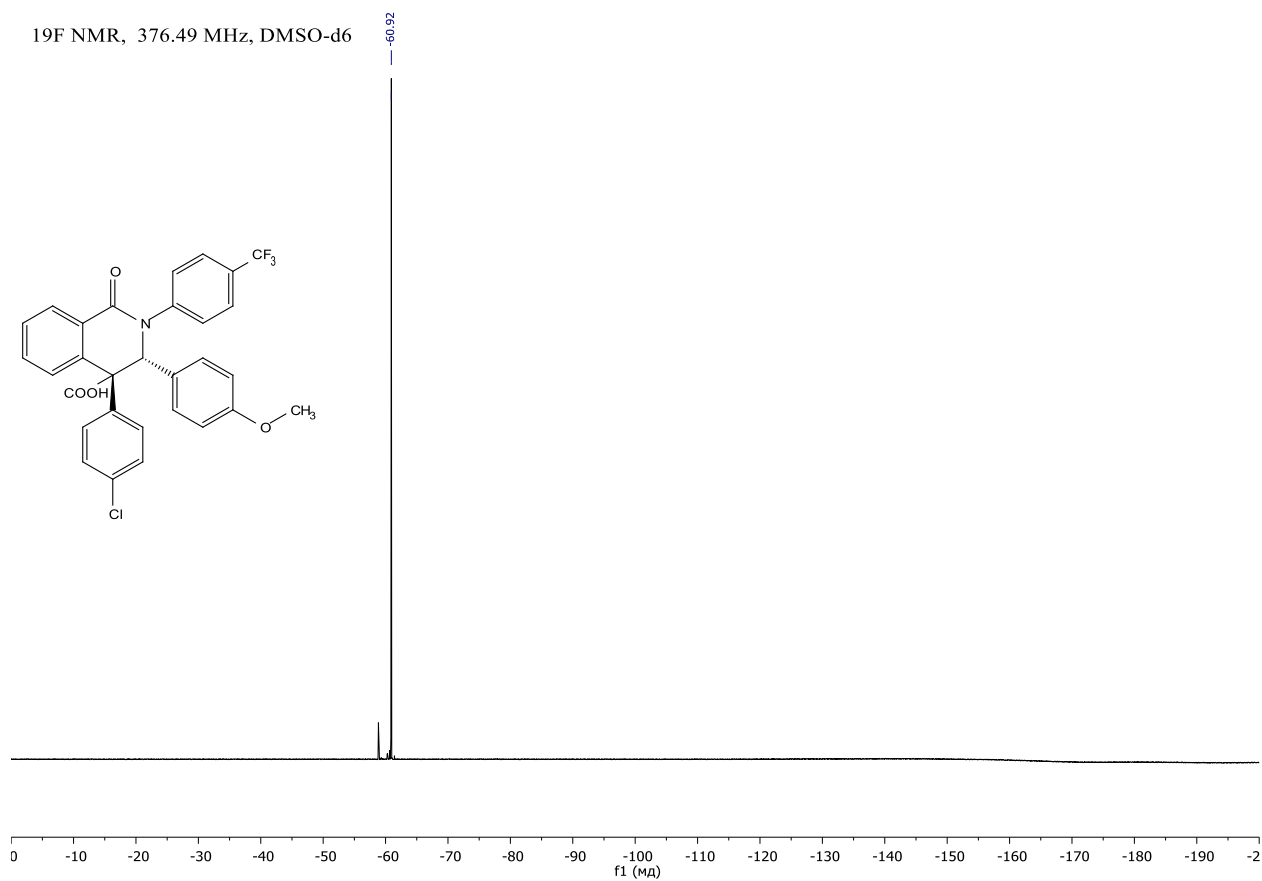

# <sup>1</sup>H and <sup>13</sup>C NMR spectra of compound **9k**

<sup>1</sup>H NMR, 400.13 MHz, DMSO-d<sub>6</sub>

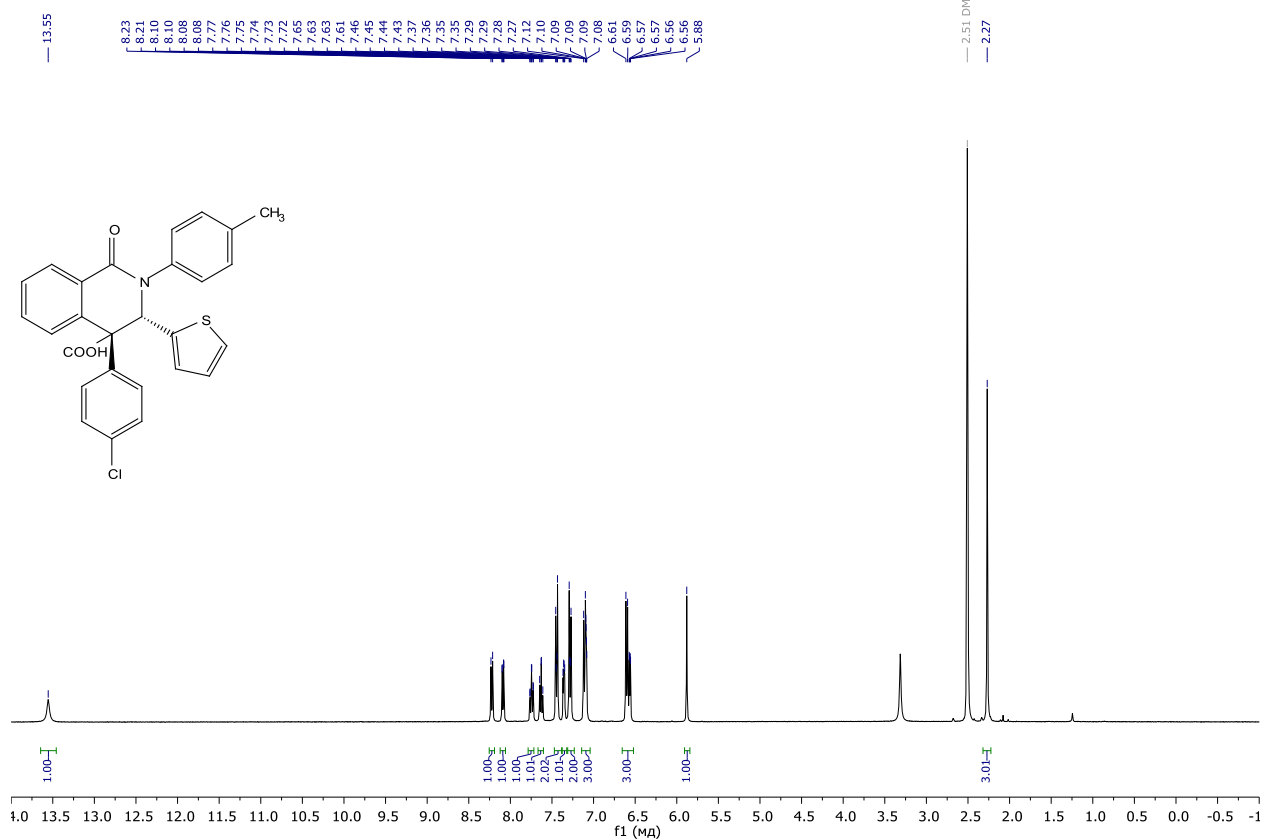

<sup>13</sup>C NMR, 100.61 MHz, DMSO-d<sub>6</sub>

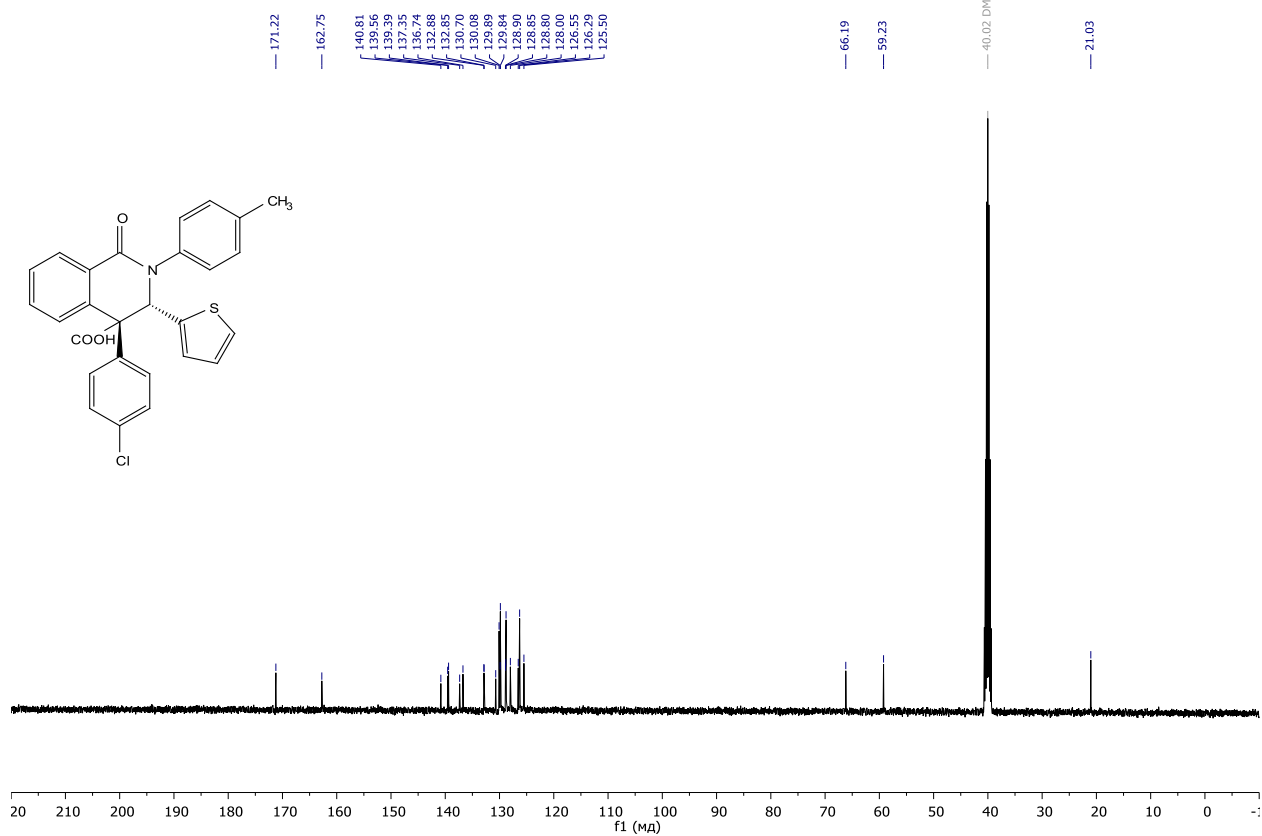

# $^1\text{H}$ , $^{13}\text{C}$ and $^{19}\text{F}$ NMR spectra of compound **9l**

$^1\text{H}$  NMR, 400.13 MHz, DMSO- $d_6$

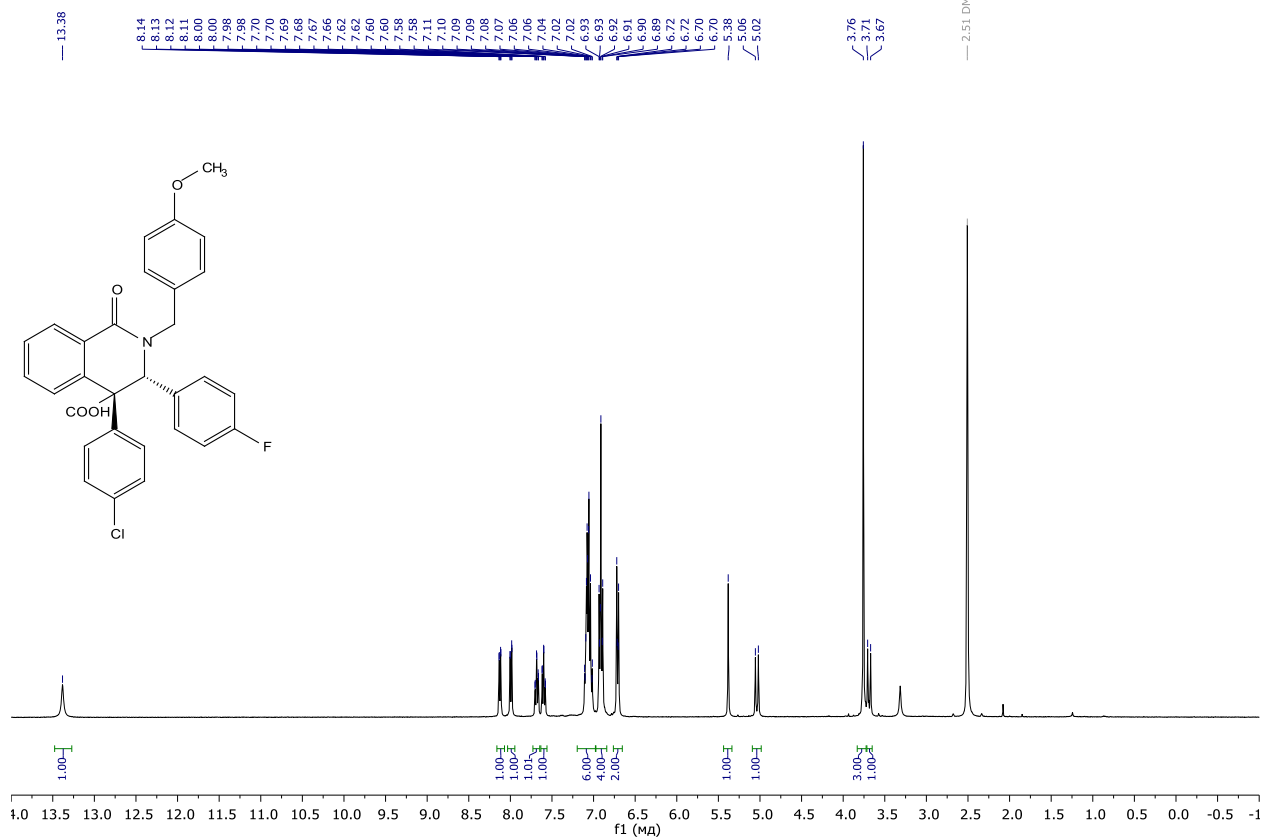

$^{13}\text{C}$  NMR, 100.61 MHz, DMSO- $d_6$

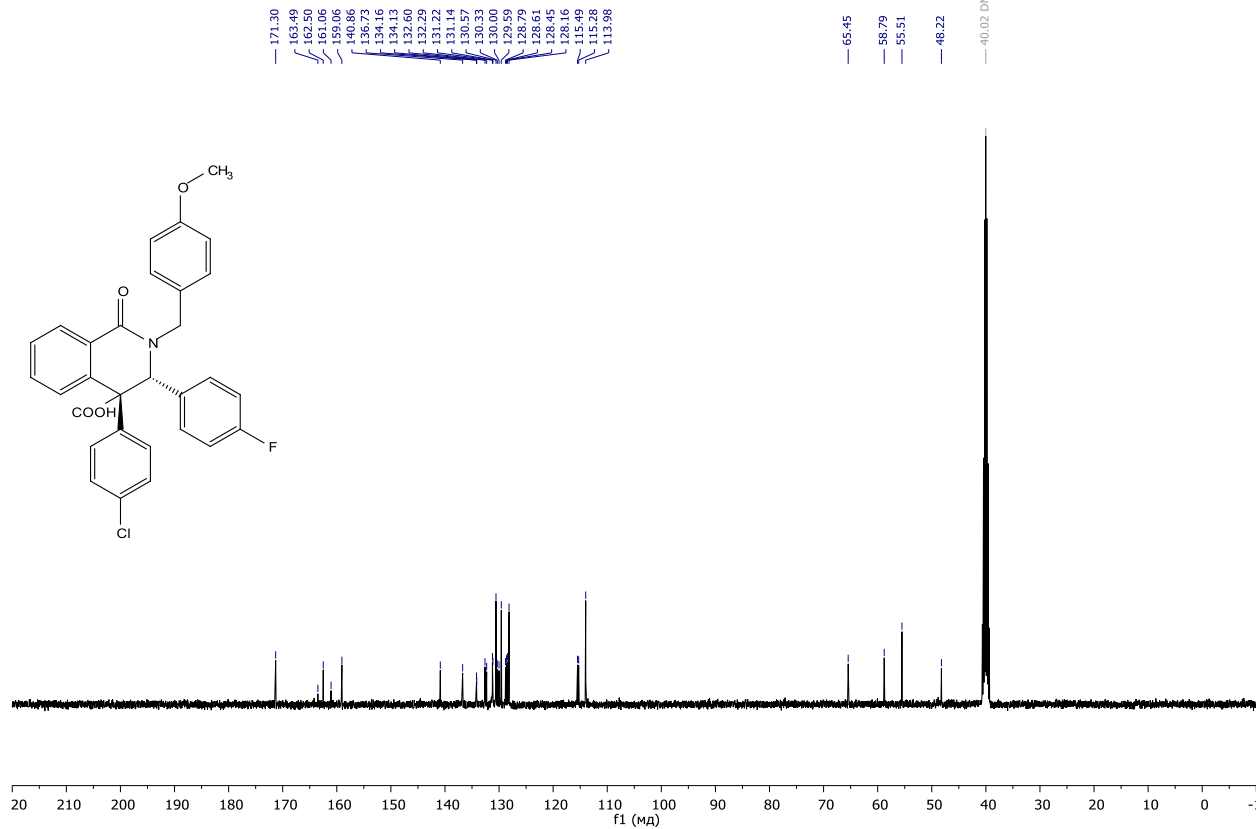

<sup>19</sup>F NMR, 376.49 MHz, DMSO-d<sub>6</sub>

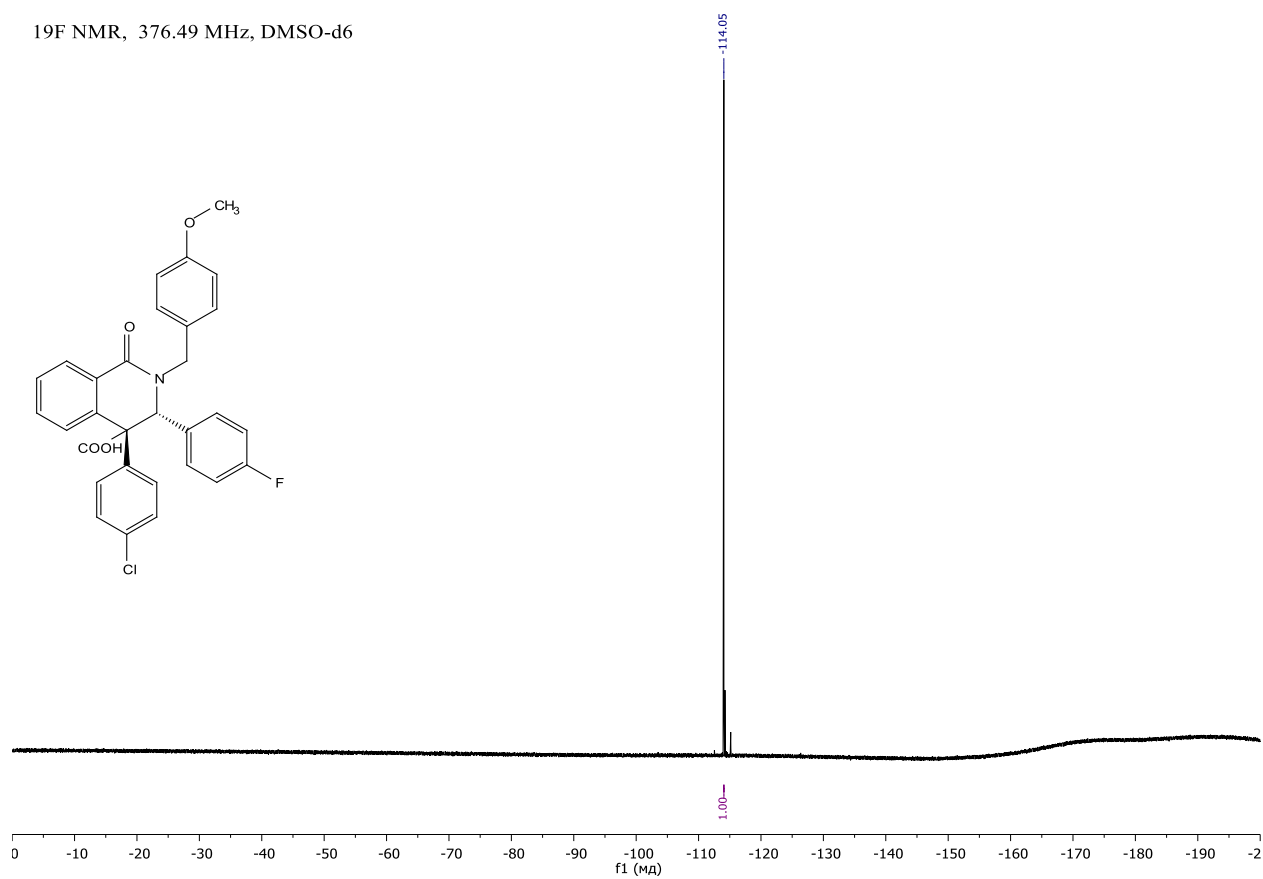

# <sup>1</sup>H and <sup>13</sup>C NMR spectra of compound **9m**

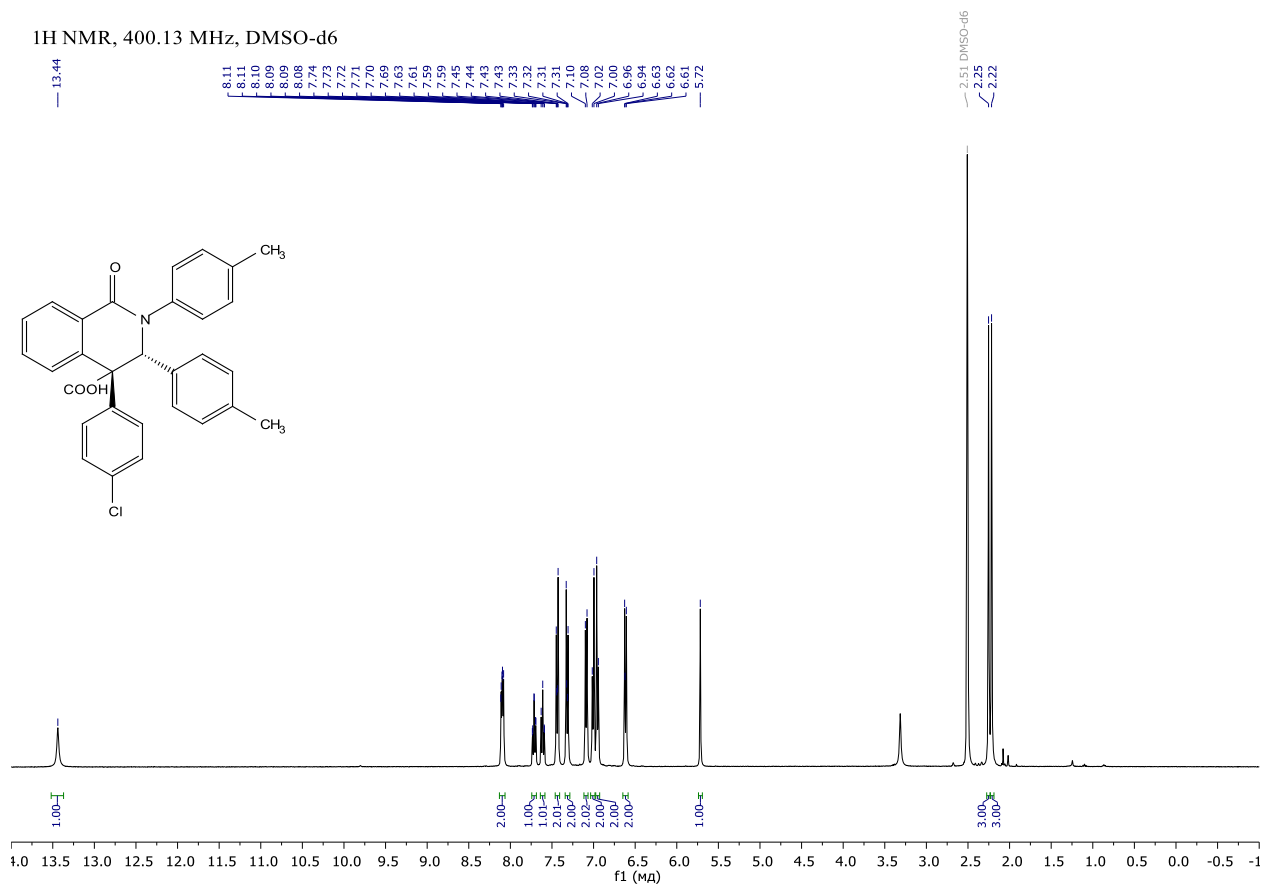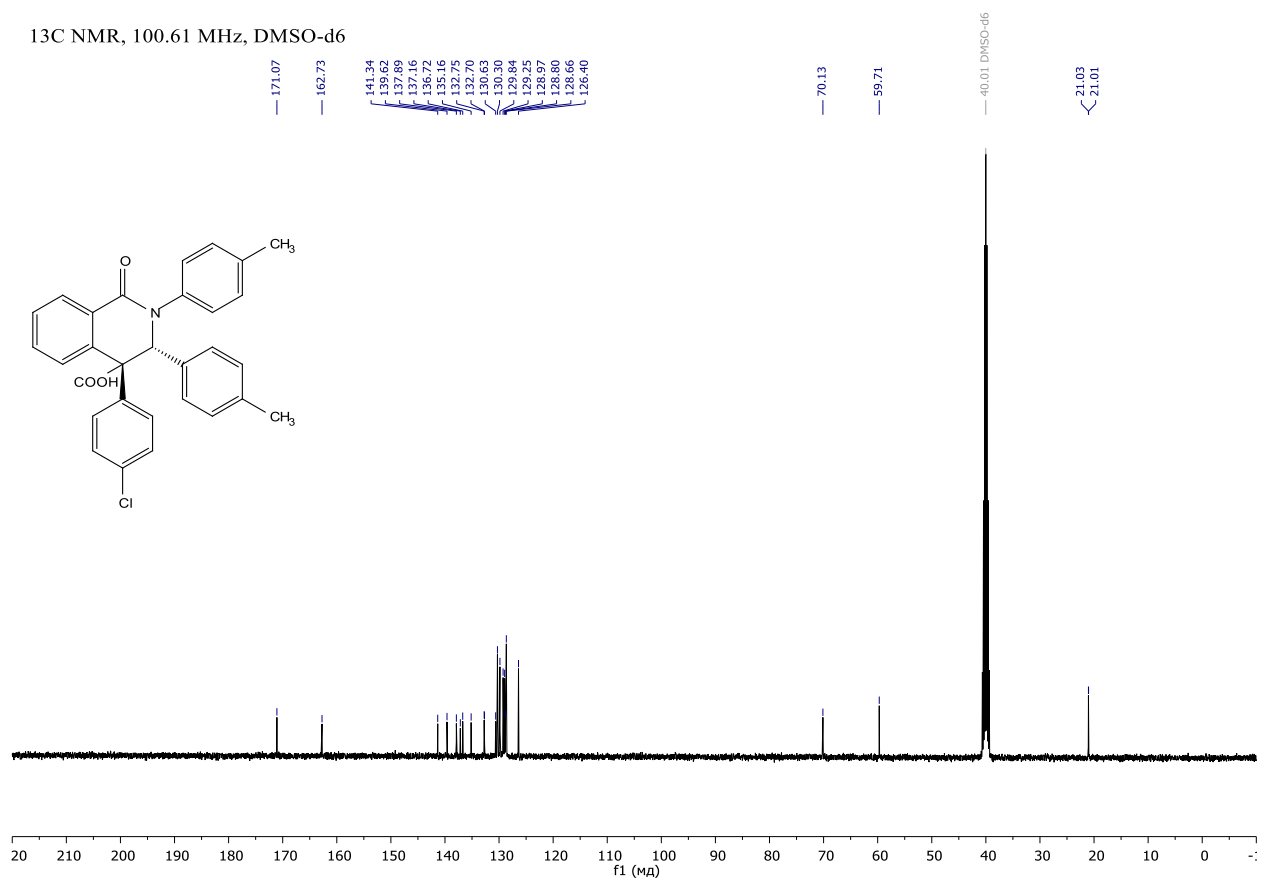

1H NMR, 400.13 MHz, DMSO-d6

Chemical structure of compound 10 is shown in the top left. The structure is a benzimidazole derivative with a 4-chlorophenyl group, a 2-furyl group, and a 1-(cyclopentylthio)ethyl group. The NMR spectrum shows a broad peak at 13.52 ppm (NH), a multiplet between 7.0 and 8.5 ppm (aromatic protons), a singlet at 6.25 ppm (furan H5), a singlet at 5.87 ppm (CH), a multiplet between 1.2 and 2.0 ppm (cyclopentyl protons). Integration values are shown below the peaks.

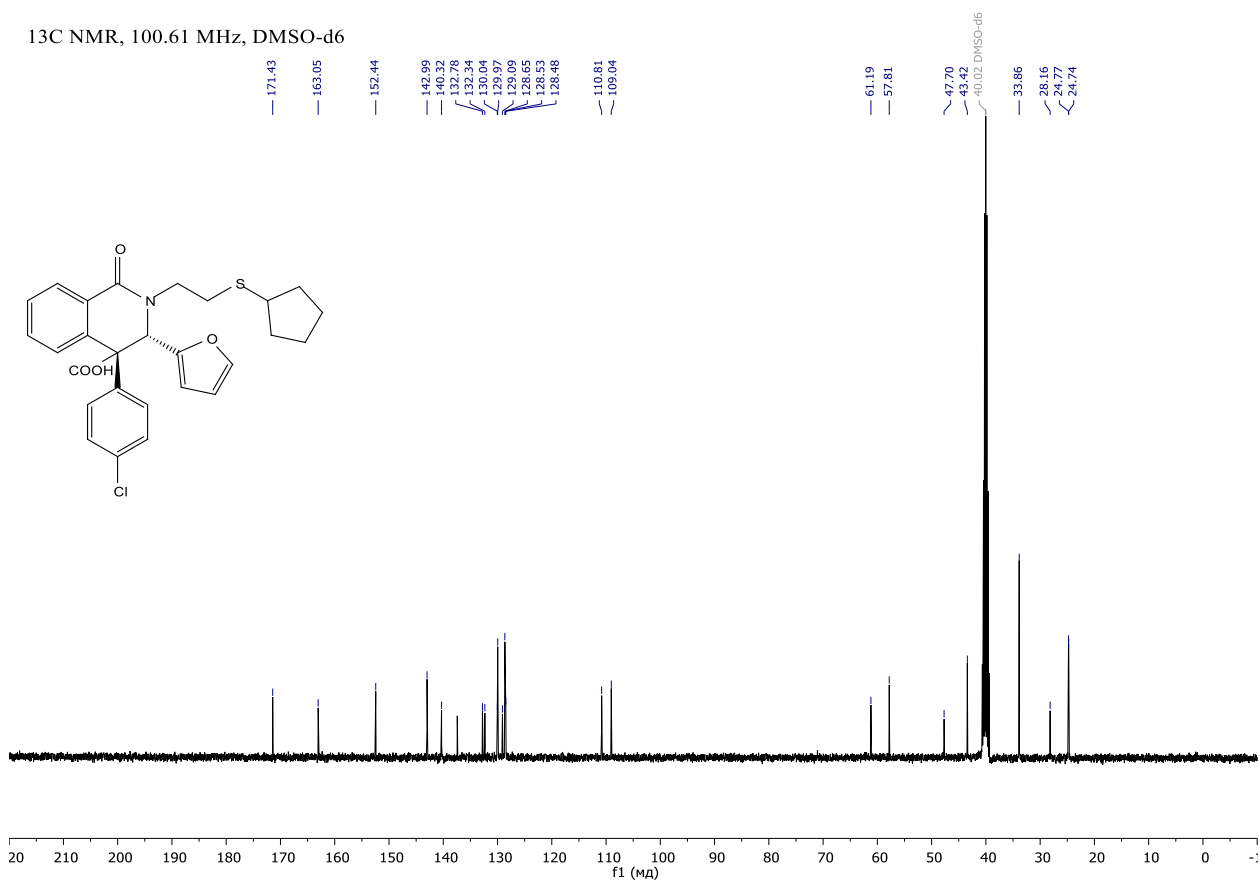



# <sup>1</sup>H and <sup>13</sup>C NMR spectra of compound **9o**

<sup>1</sup>H NMR, 400.13 MHz, DMSO-d<sub>6</sub>

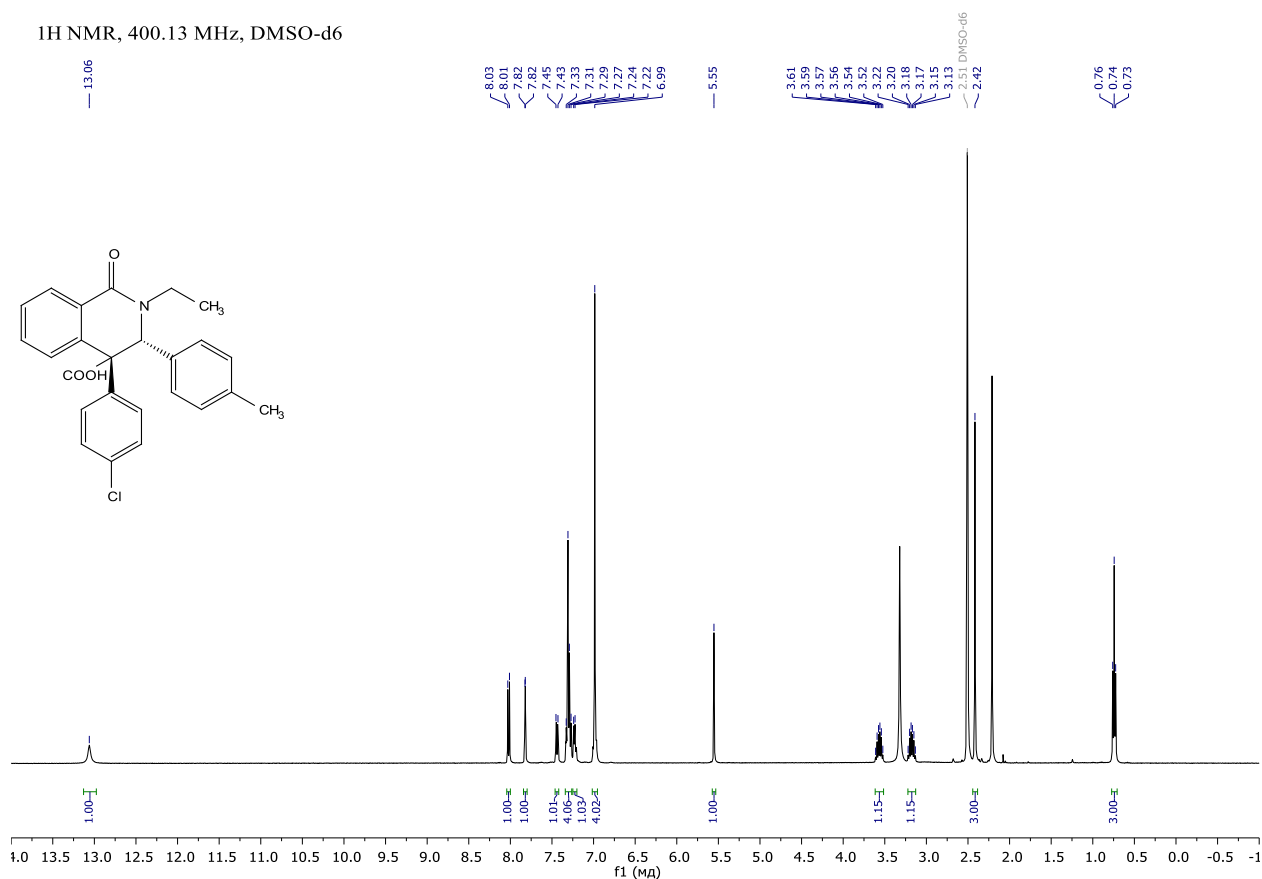

<sup>13</sup>C NMR, 100.61 MHz, DMSO-d<sub>6</sub>

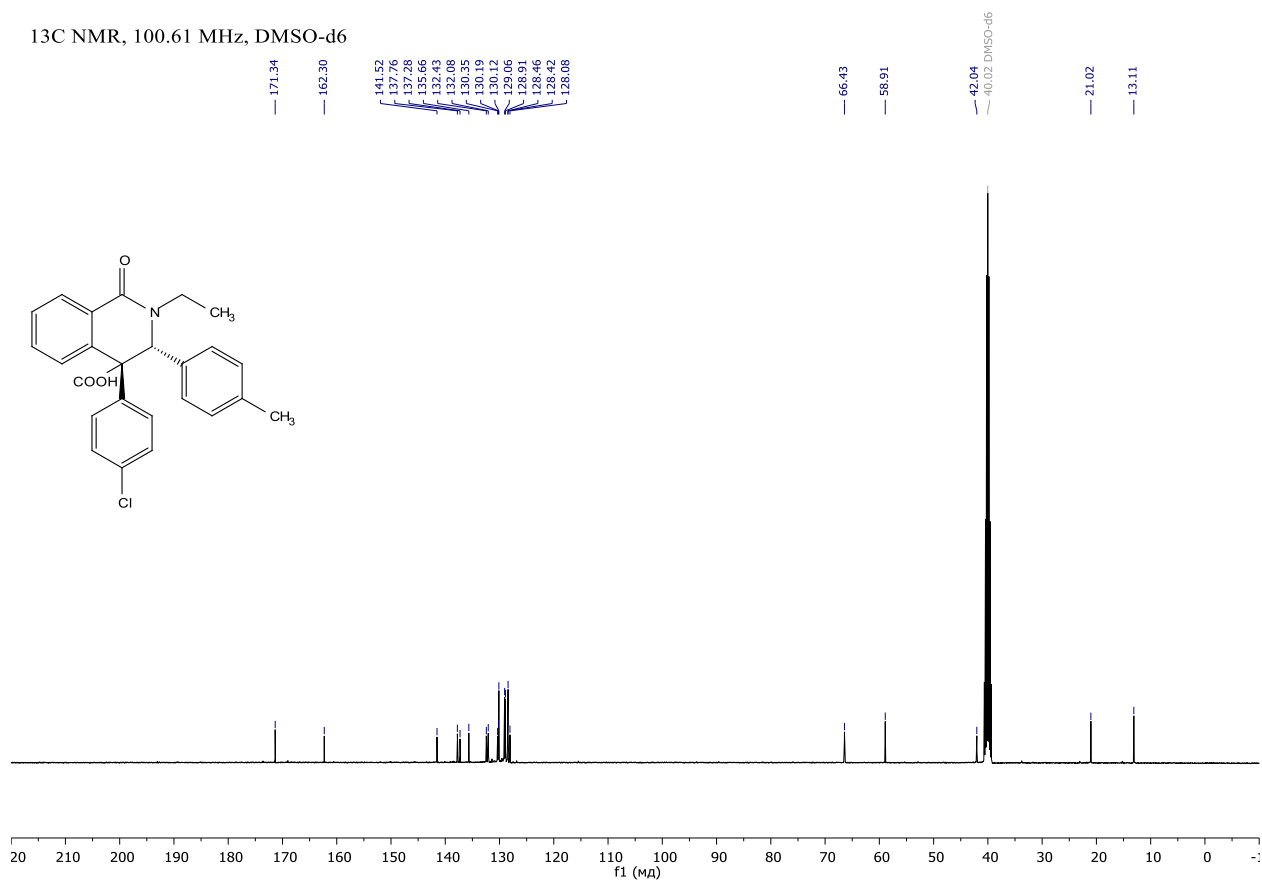

# <sup>1</sup>H and <sup>13</sup>C NMR spectra of compound **9p**

<sup>1</sup>H NMR, 400.13 MHz, DMSO-d<sub>6</sub>

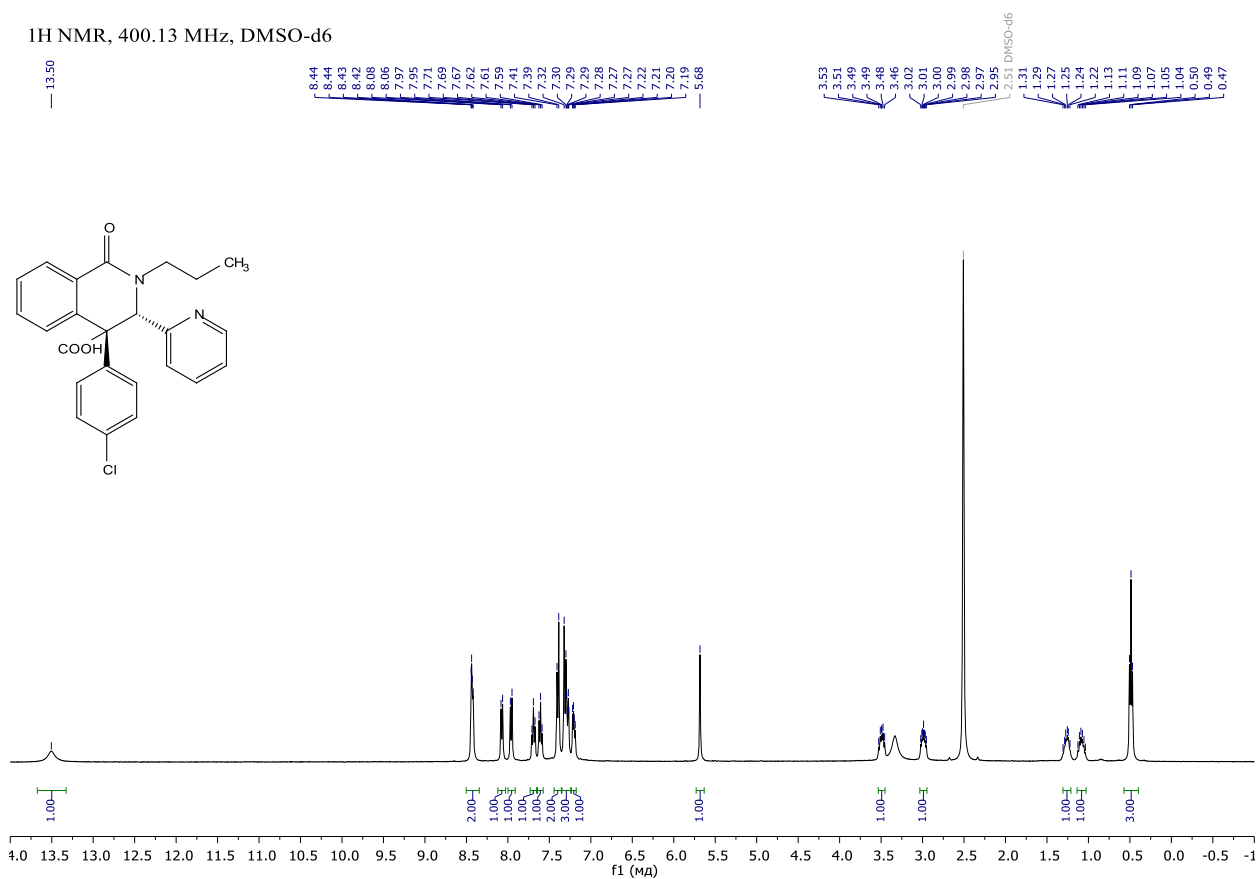

<sup>13</sup>C NMR, 100.61 MHz, DMSO-d<sub>6</sub>

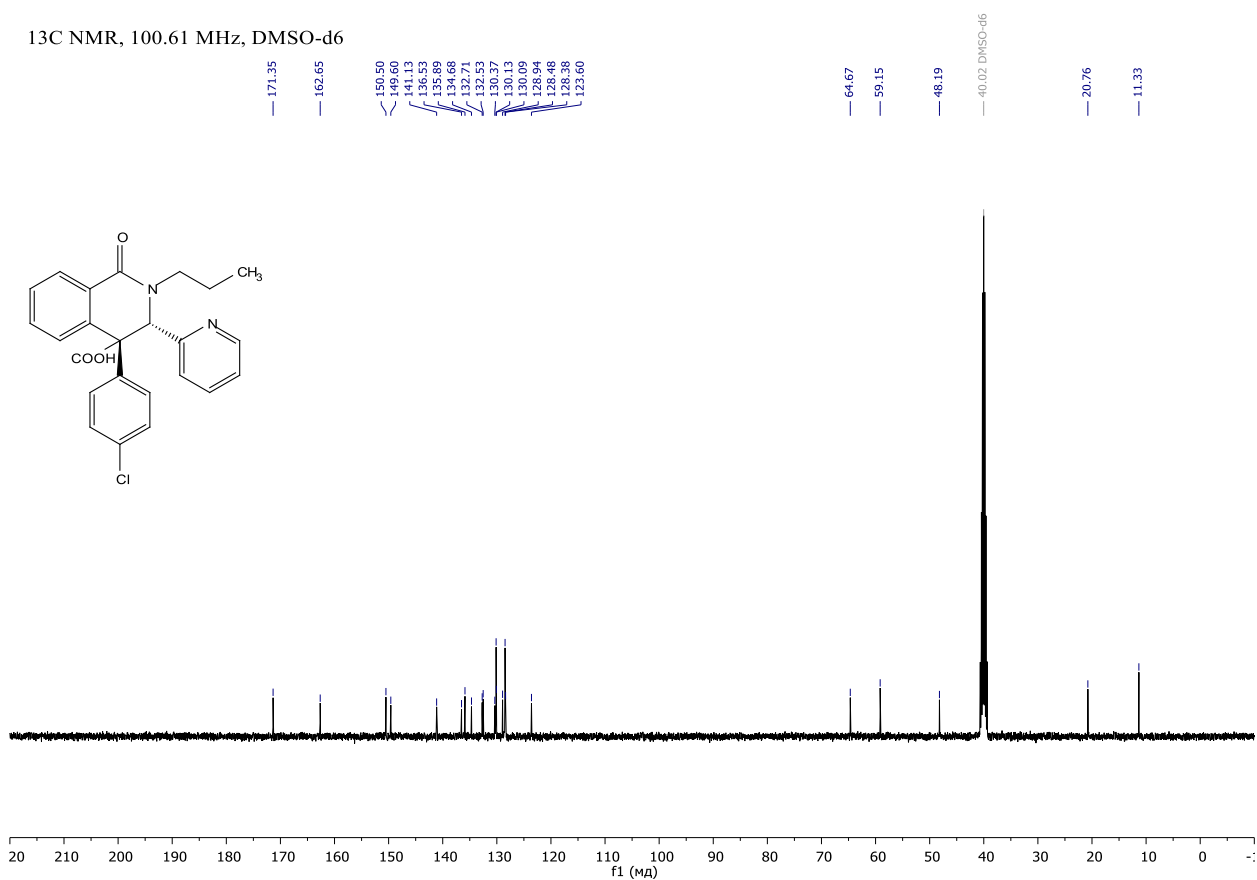

$^1\text{H}$ ,  $^{13}\text{C}$  and  $^{19}\text{F}$  NMR spectra of compound **9q**

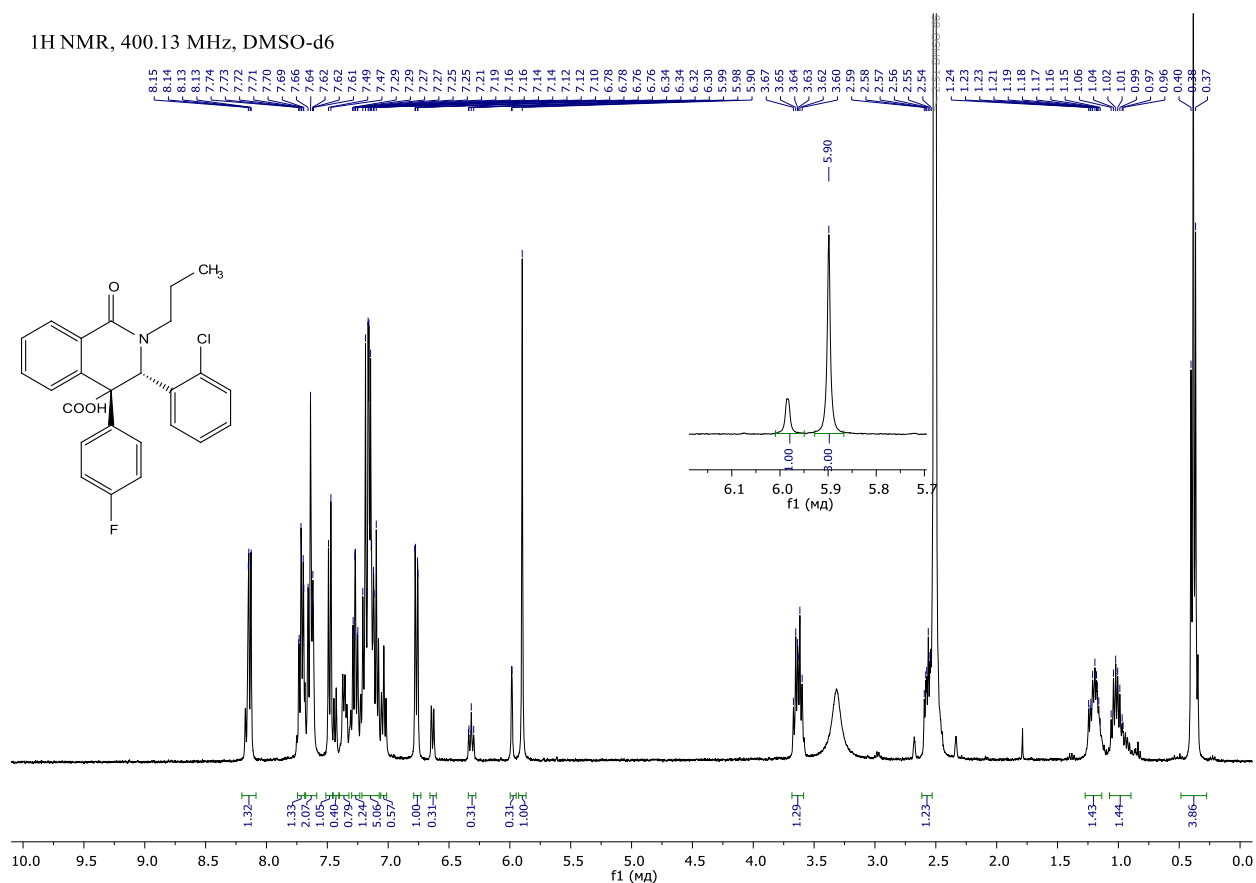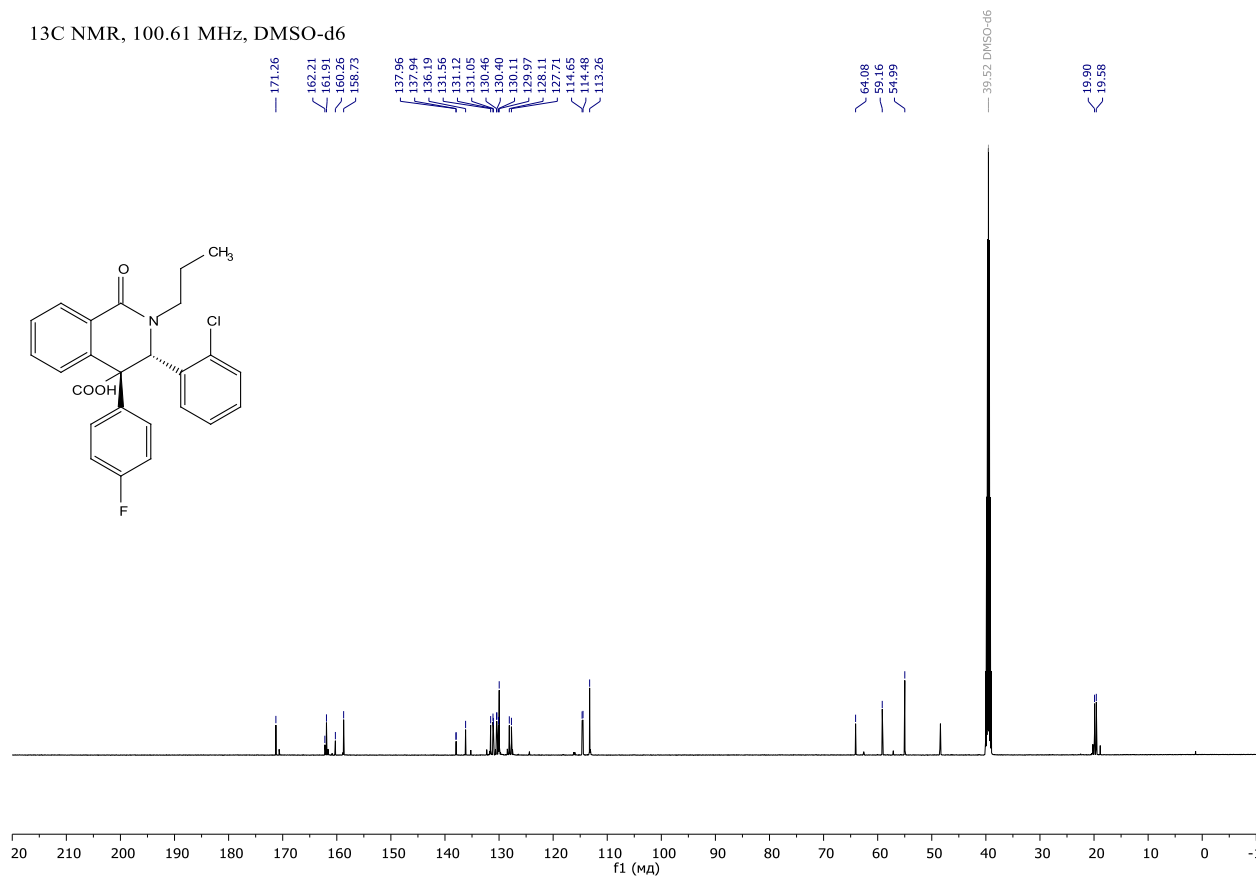

<sup>19</sup>F NMR, 376.49 MHz, DMSO-d<sub>6</sub>

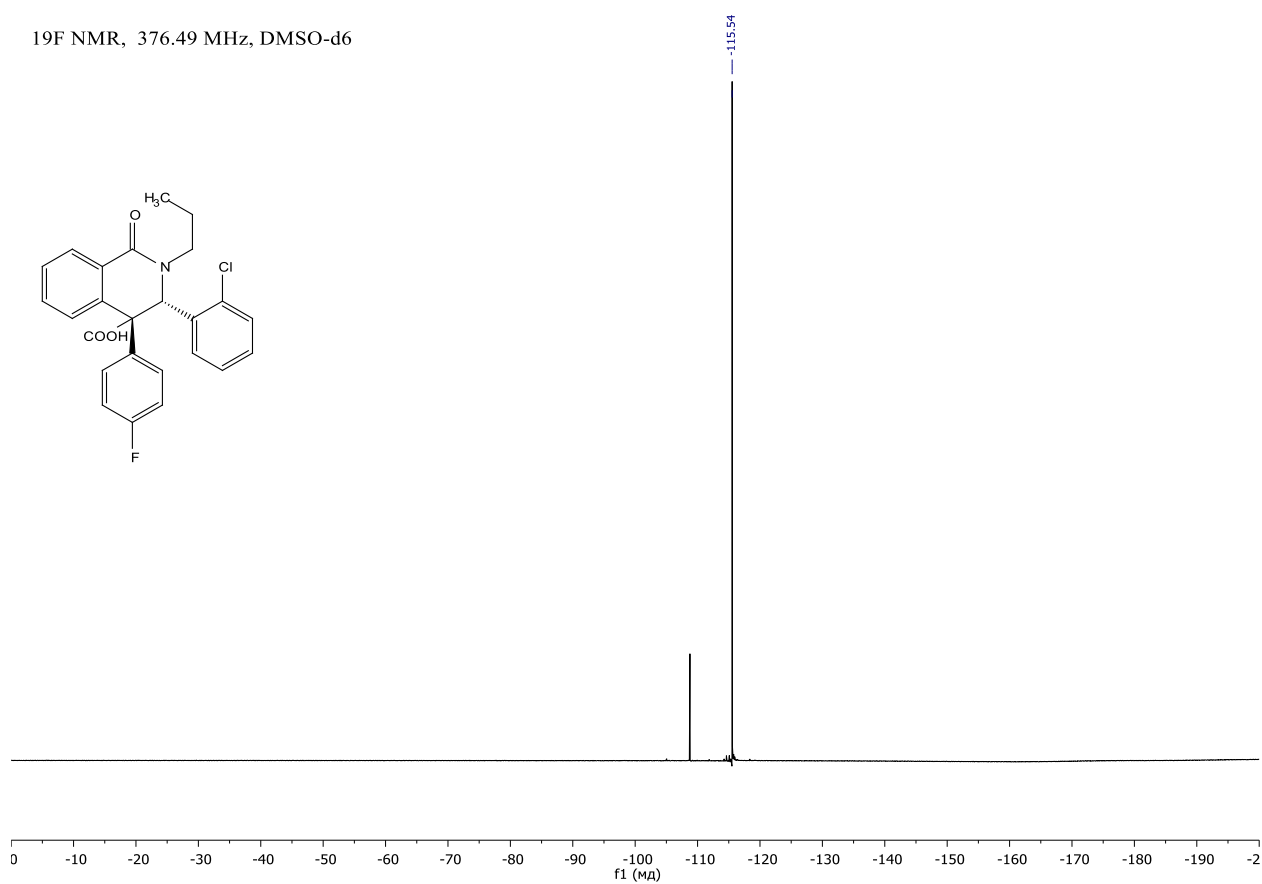

$^1\text{H}$ ,  $^{13}\text{C}$  and  $^{19}\text{F}$  NMR spectra of compound **9r**

$^1\text{H}$  NMR, 400.13 MHz, DMSO- $d_6$

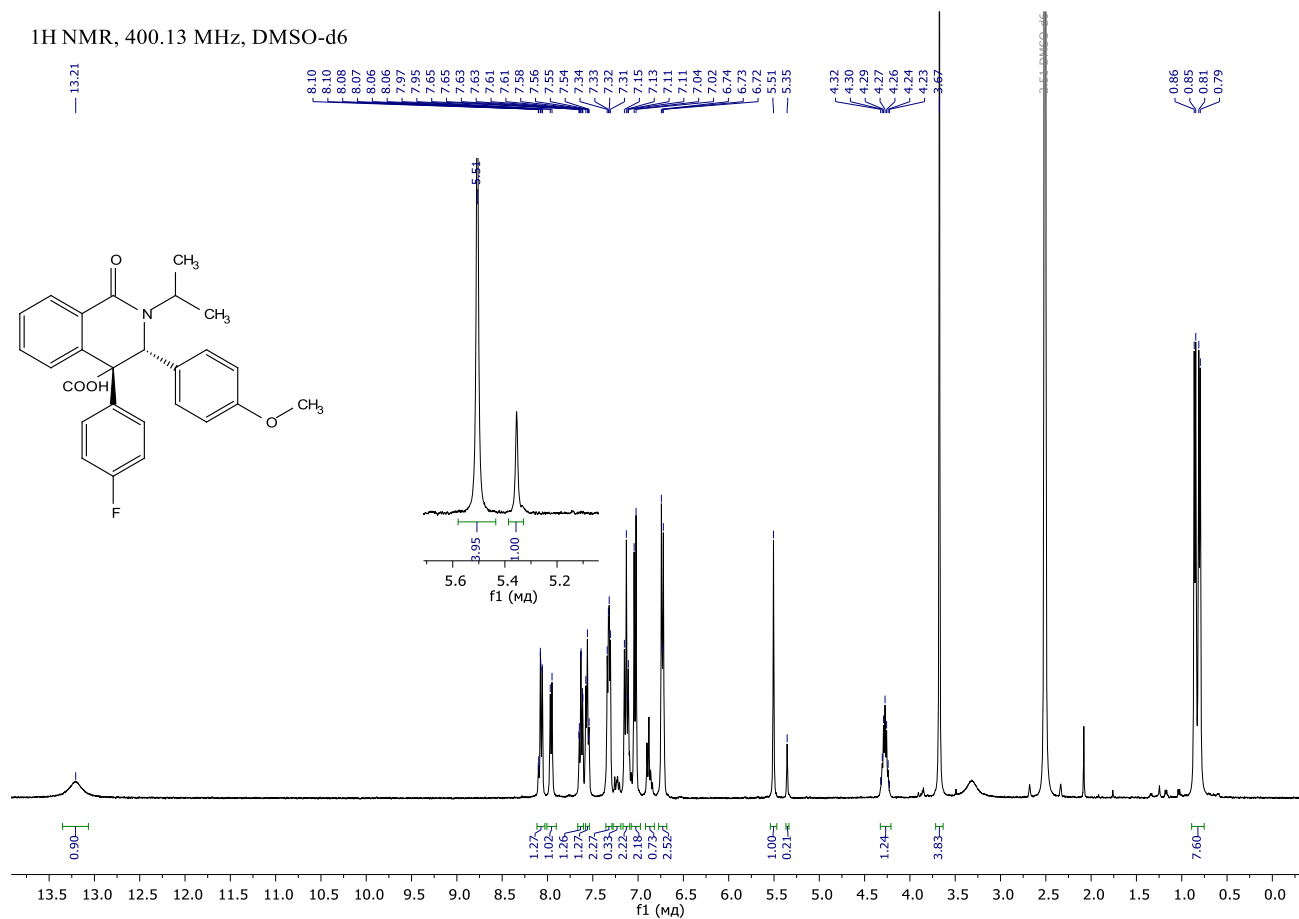

$^{13}\text{C}$  NMR, 125.73 MHz, DMSO- $d_6$

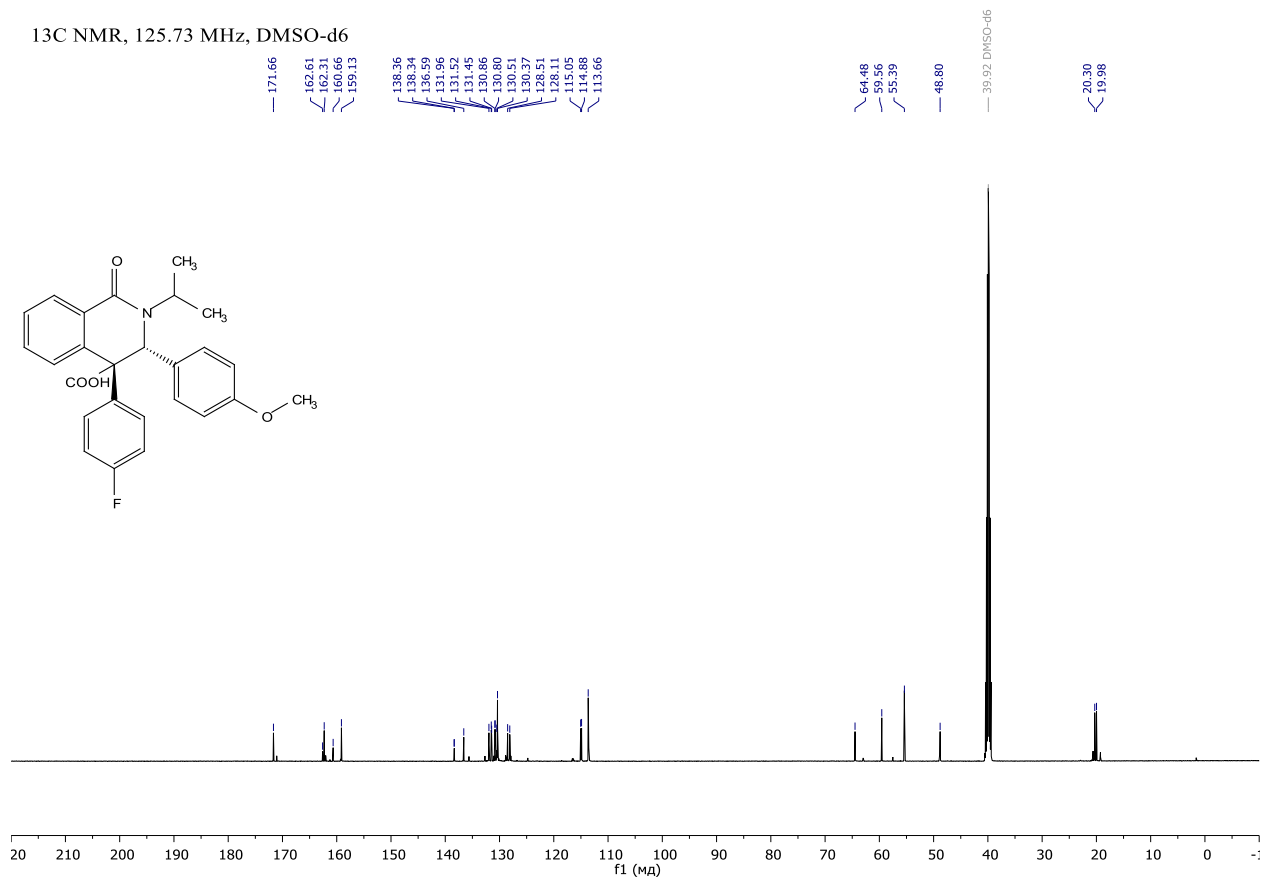

<sup>19</sup>F NMR, 376.49 MHz, DMSO-d<sub>6</sub>

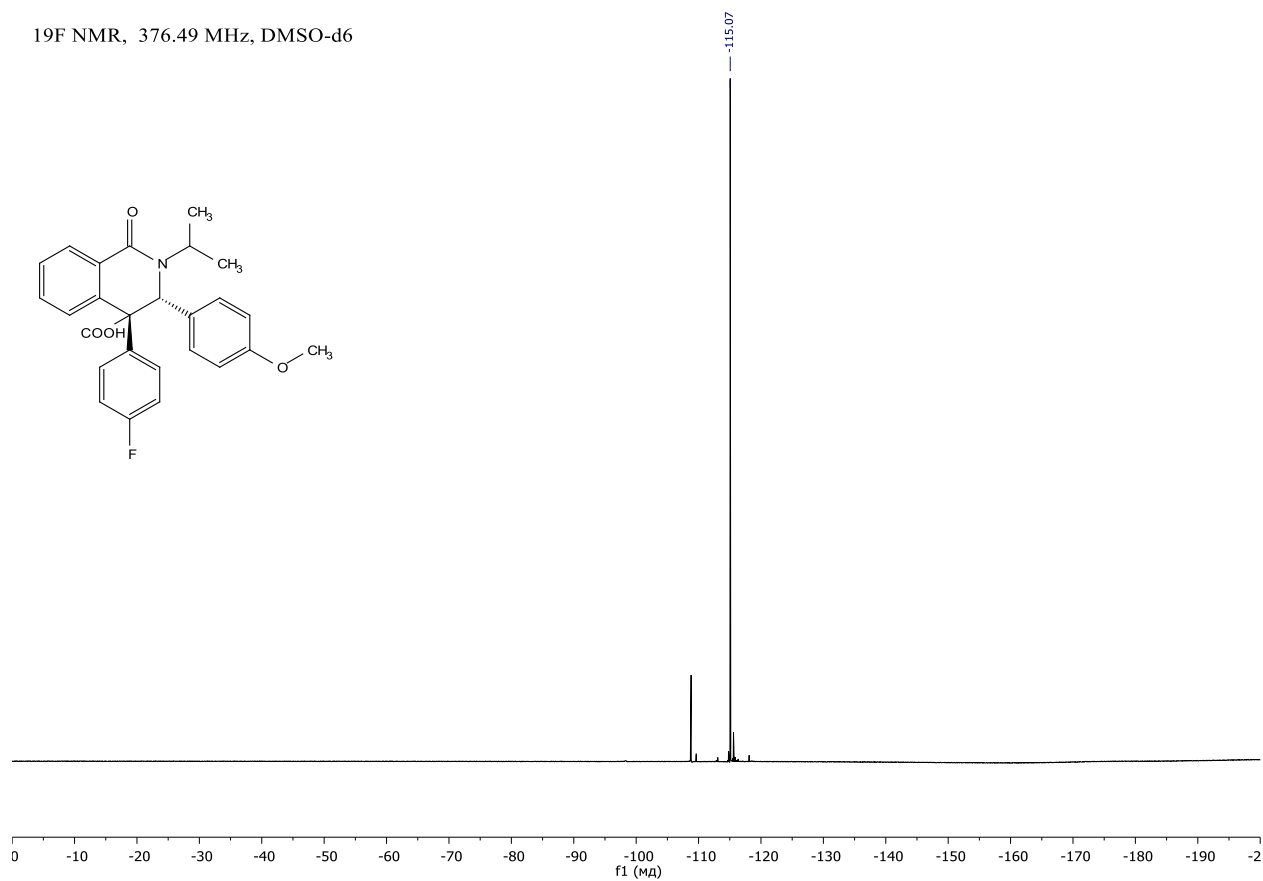

$^1\text{H}$ ,  $^{13}\text{C}$  and  $^{19}\text{F}$  NMR spectra of compound **9s**

$^1\text{H}$  NMR, 400.13 MHz, DMSO- $d_6$

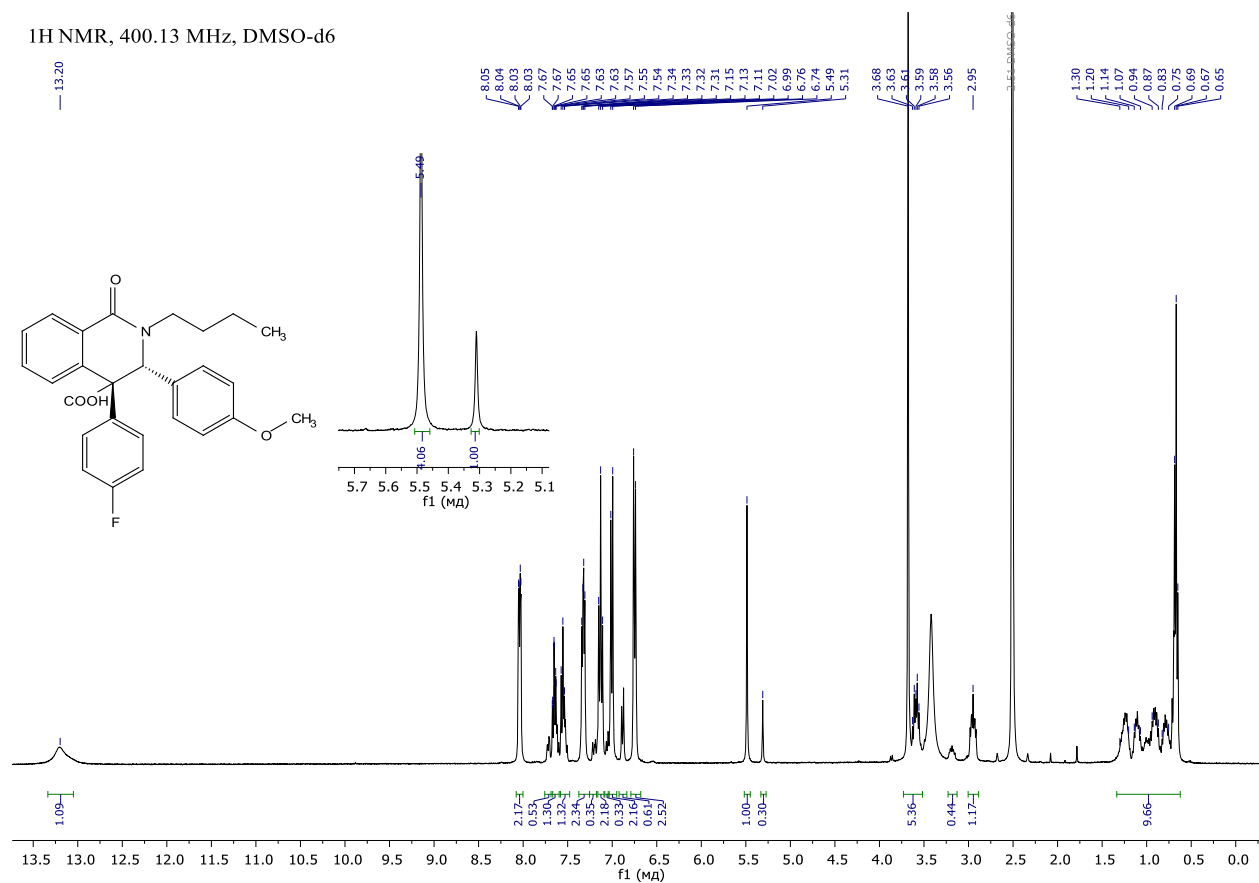

$^{13}\text{C}$  NMR, 125.73 MHz, DMSO- $d_6$

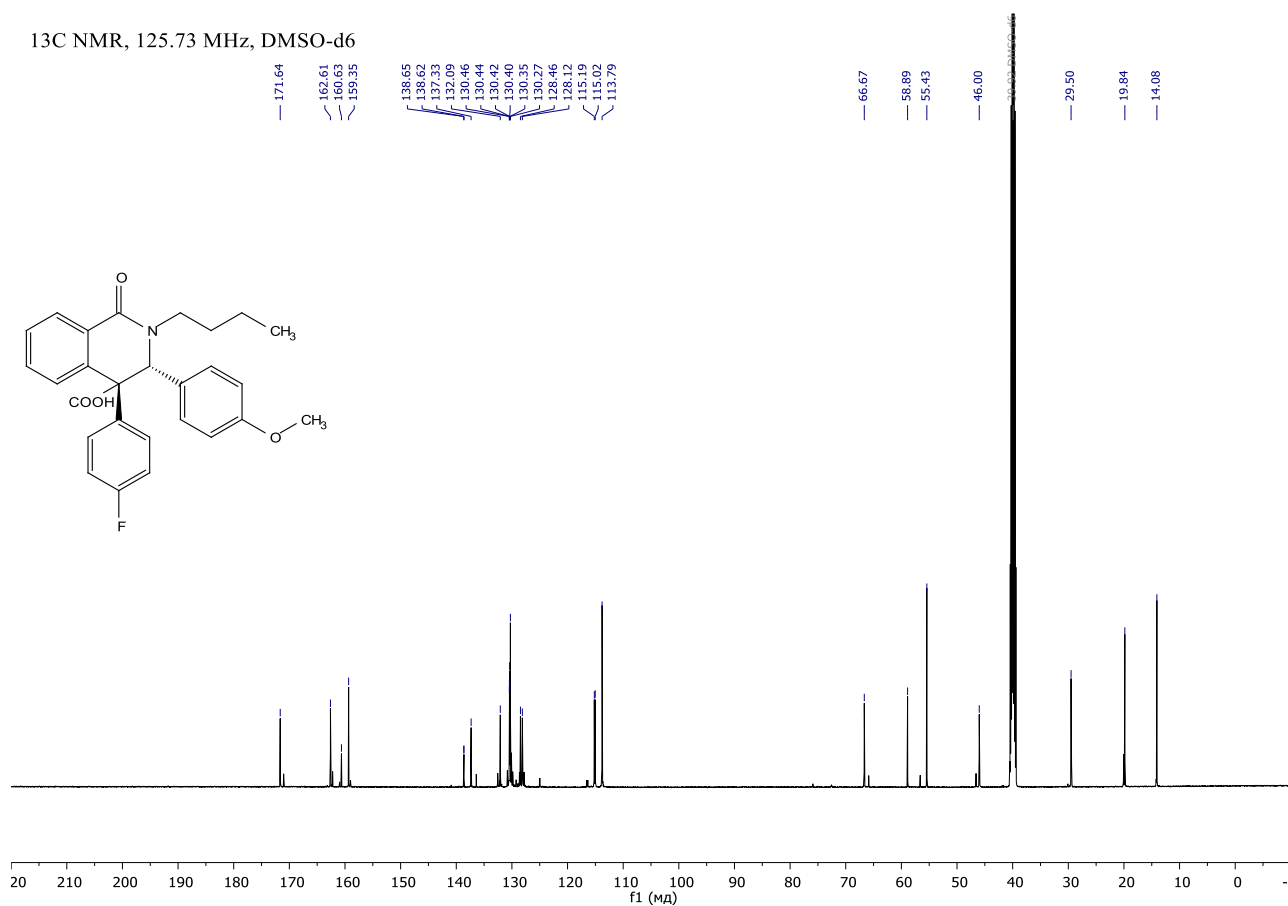

<sup>19</sup>F NMR, 376.49 MHz, DMSO-d<sub>6</sub>

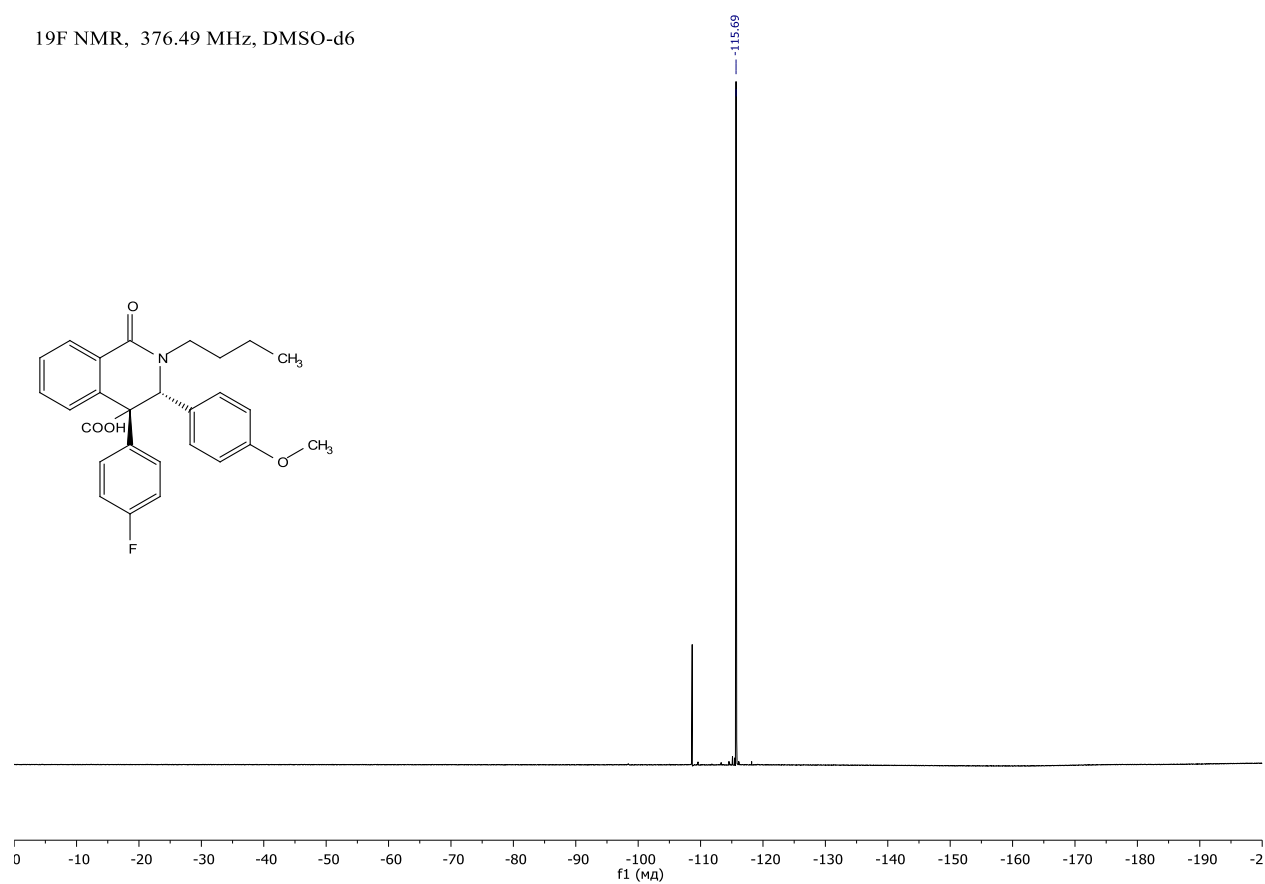



$^1\text{H}$ ,  $^{13}\text{C}$  and  $^{19}\text{F}$  NMR spectra of compound **9t**

$^1\text{H}$  NMR, 400.13 MHz, DMSO- $d_6$

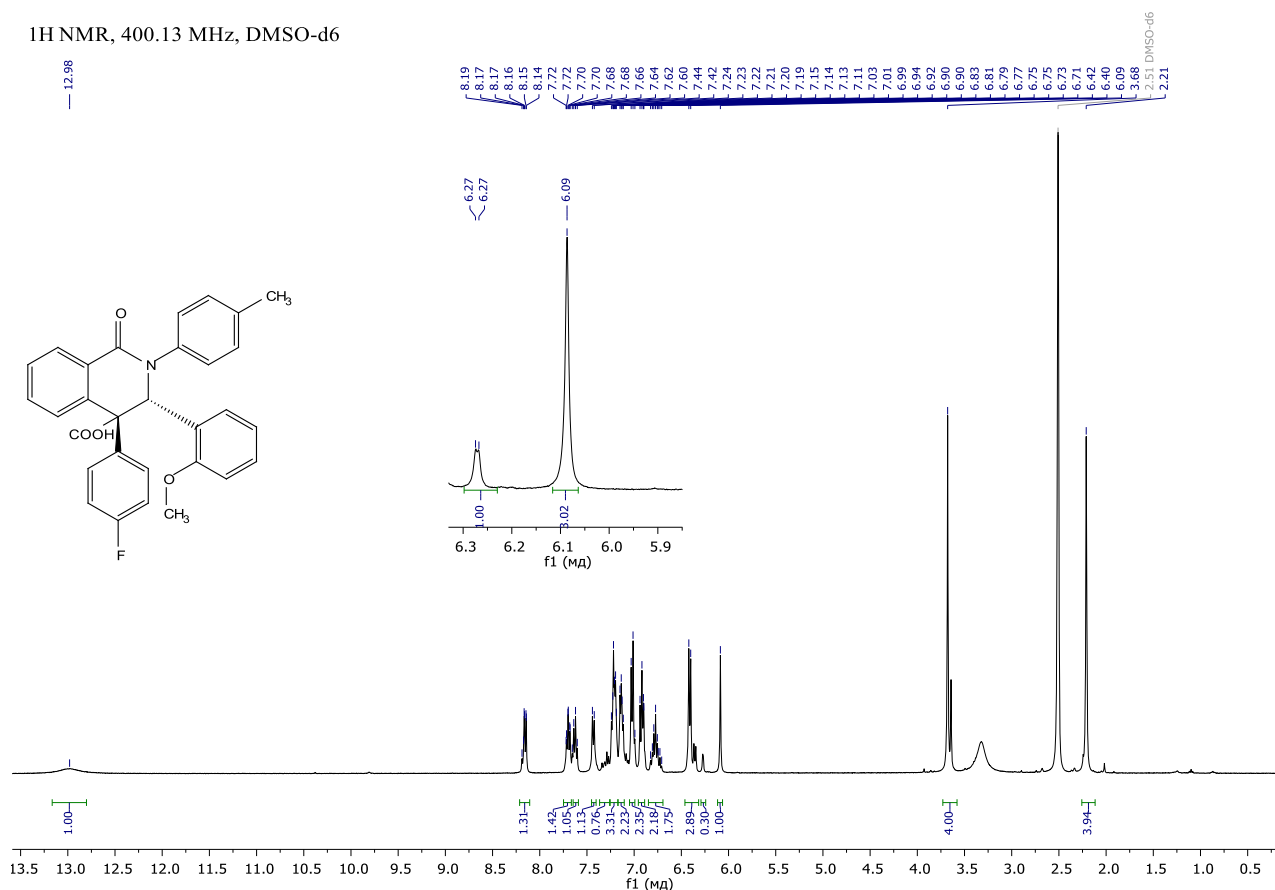

$^{13}\text{C}$  NMR, 100.61 MHz, DMSO- $d_6$

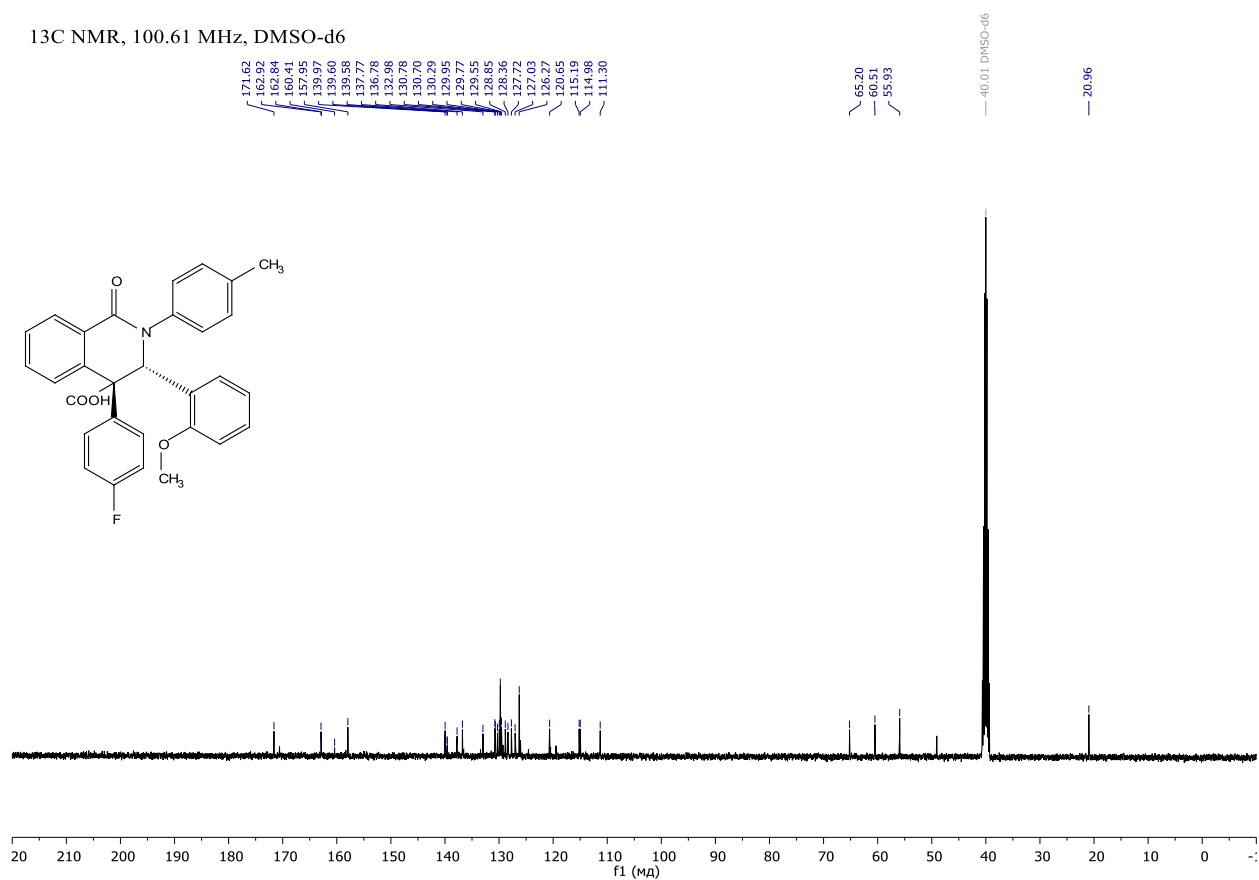

<sup>19</sup>F NMR, 376.49 MHz, DMSO-d<sub>6</sub>

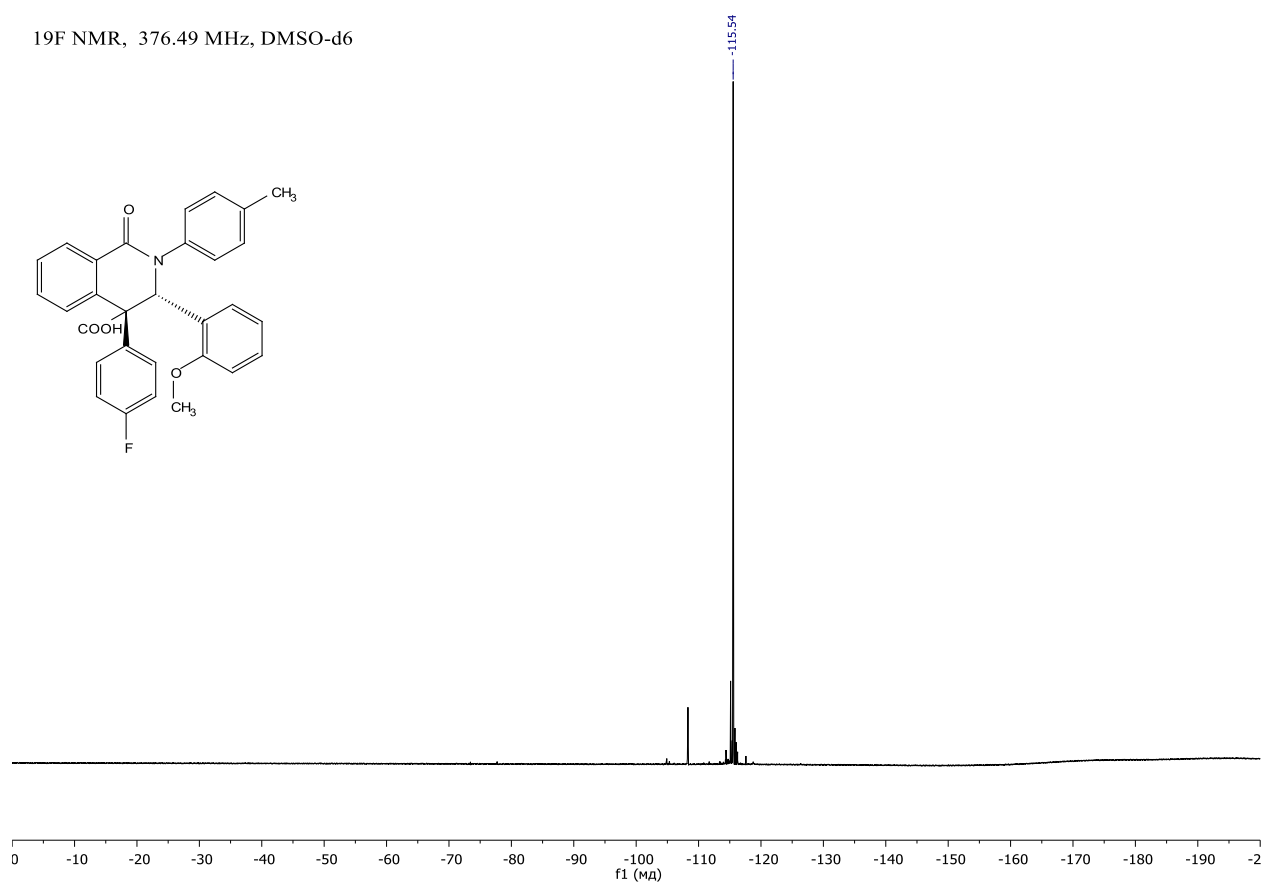

# <sup>1</sup>H, <sup>13</sup>C and <sup>19</sup>F NMR spectra of compound **9u**

<sup>1</sup>H NMR, 400.13 MHz, DMSO-d<sub>6</sub>

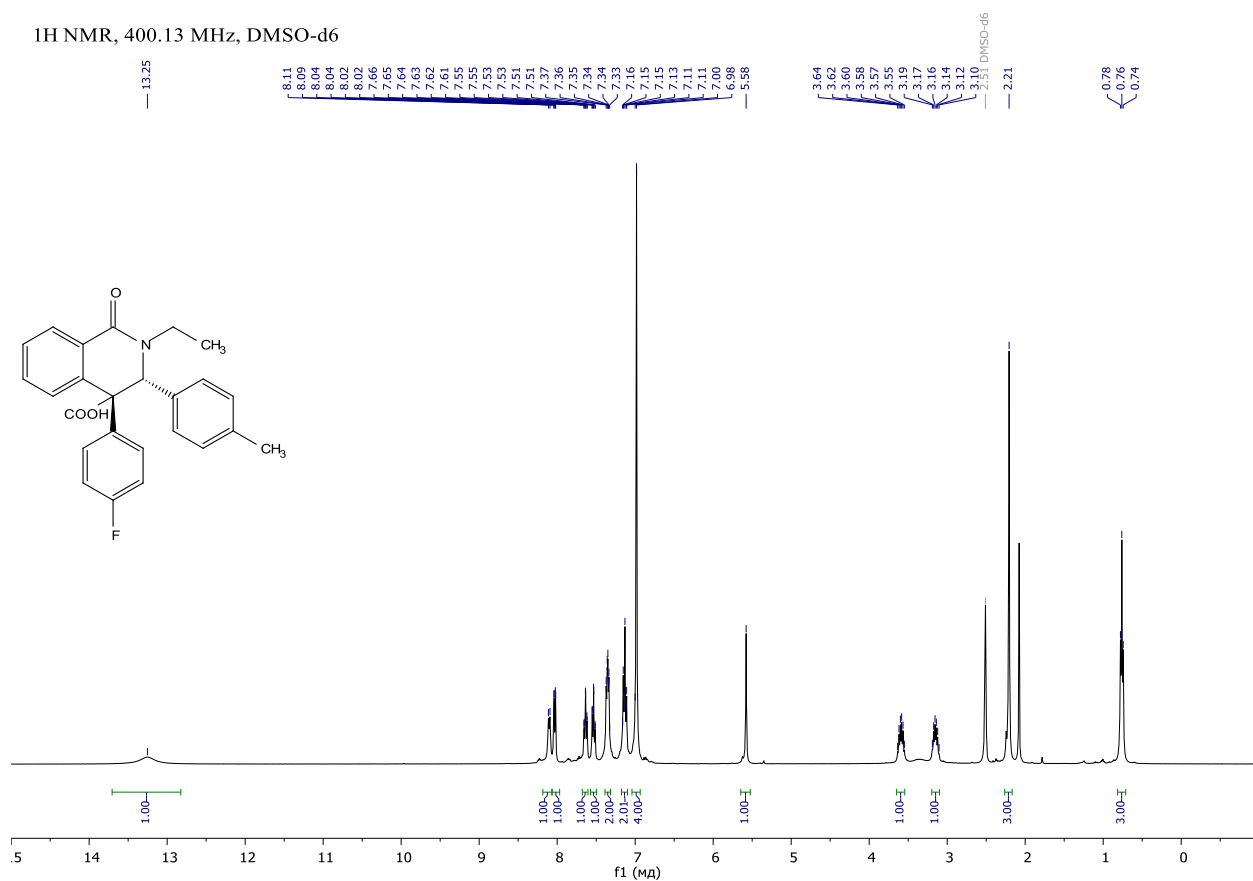

<sup>13</sup>C NMR, 100.61 MHz, DMSO-d<sub>6</sub>

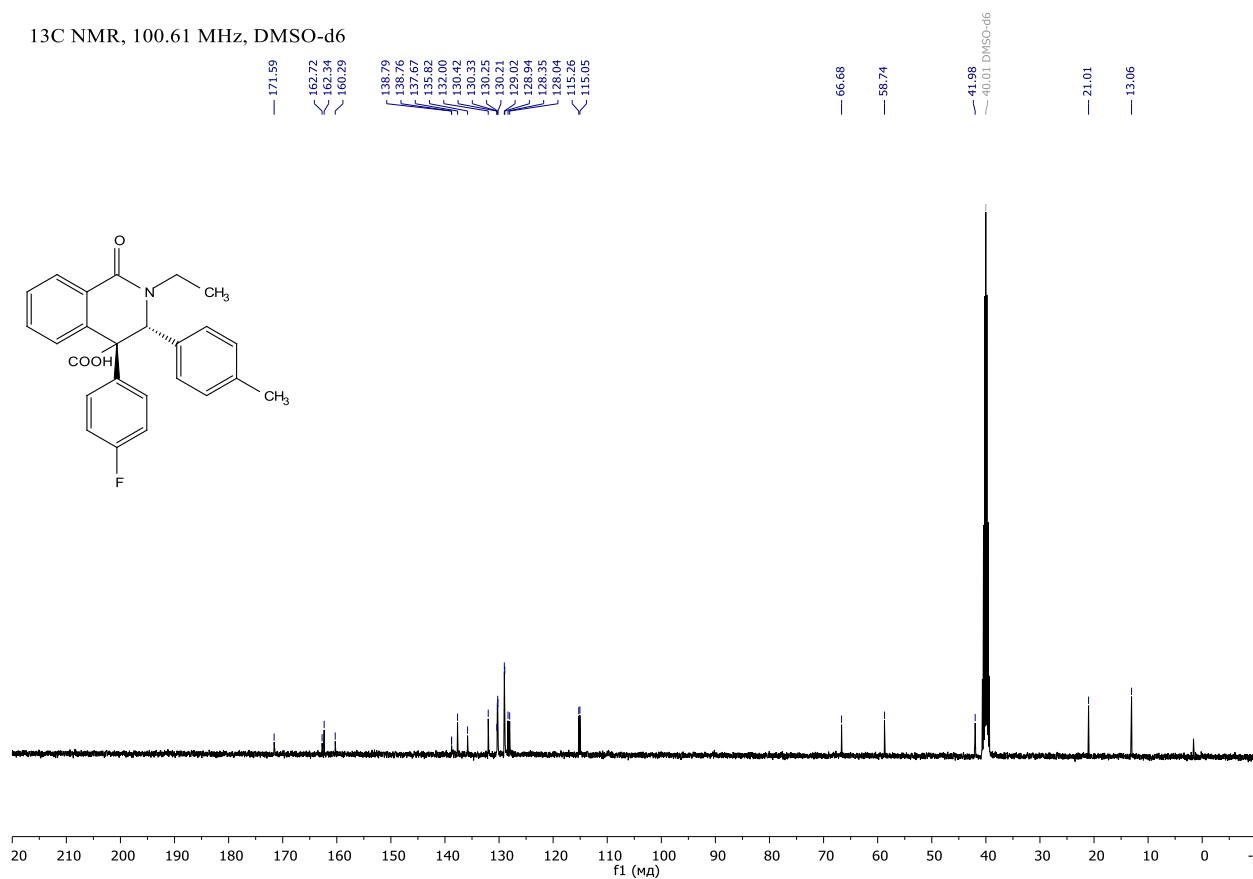

<sup>19</sup>F NMR, 376.49 MHz, DMSO-d<sub>6</sub>

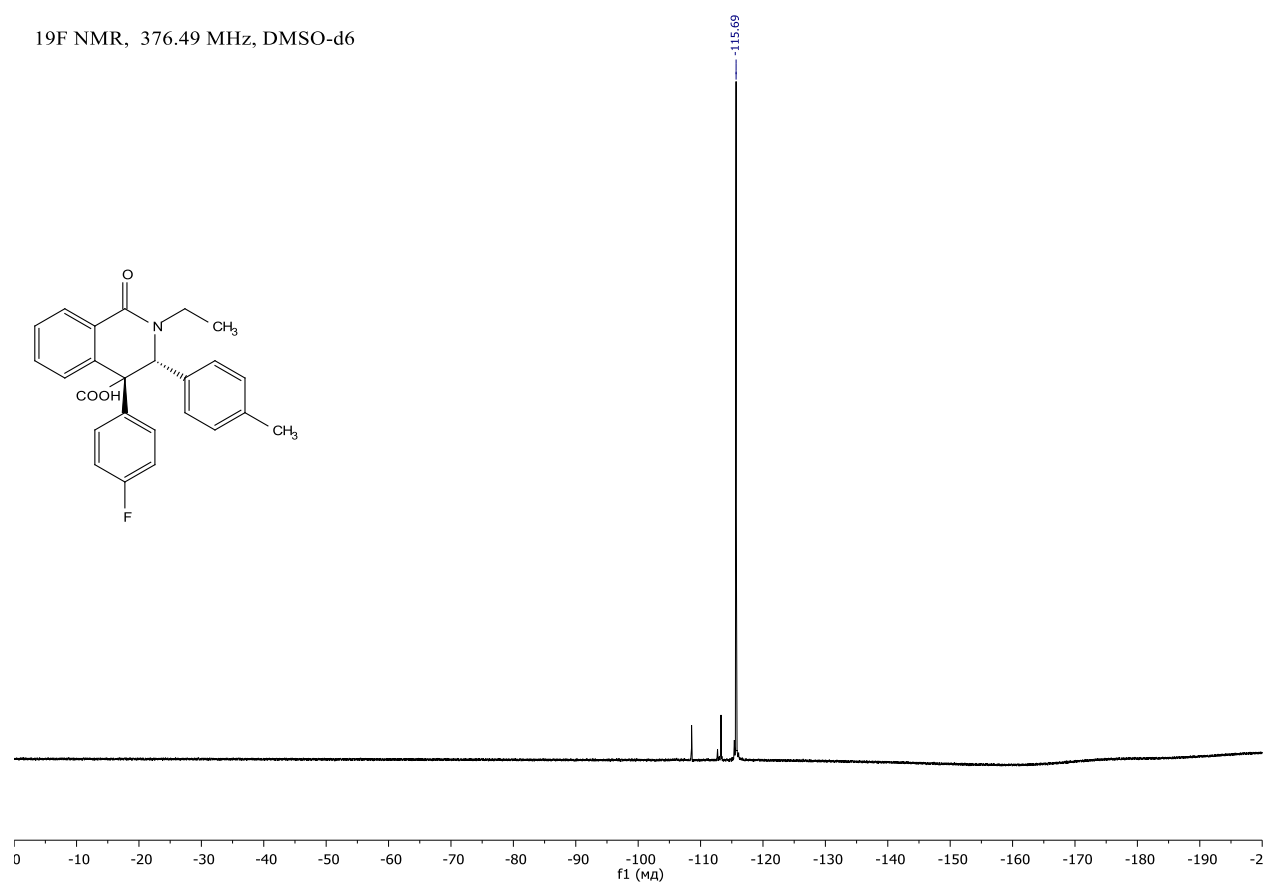

# <sup>1</sup>H and <sup>13</sup>C NMR spectra of compound **15**

<sup>1</sup>H NMR, 400.13 MHz, DMSO-d<sub>6</sub>

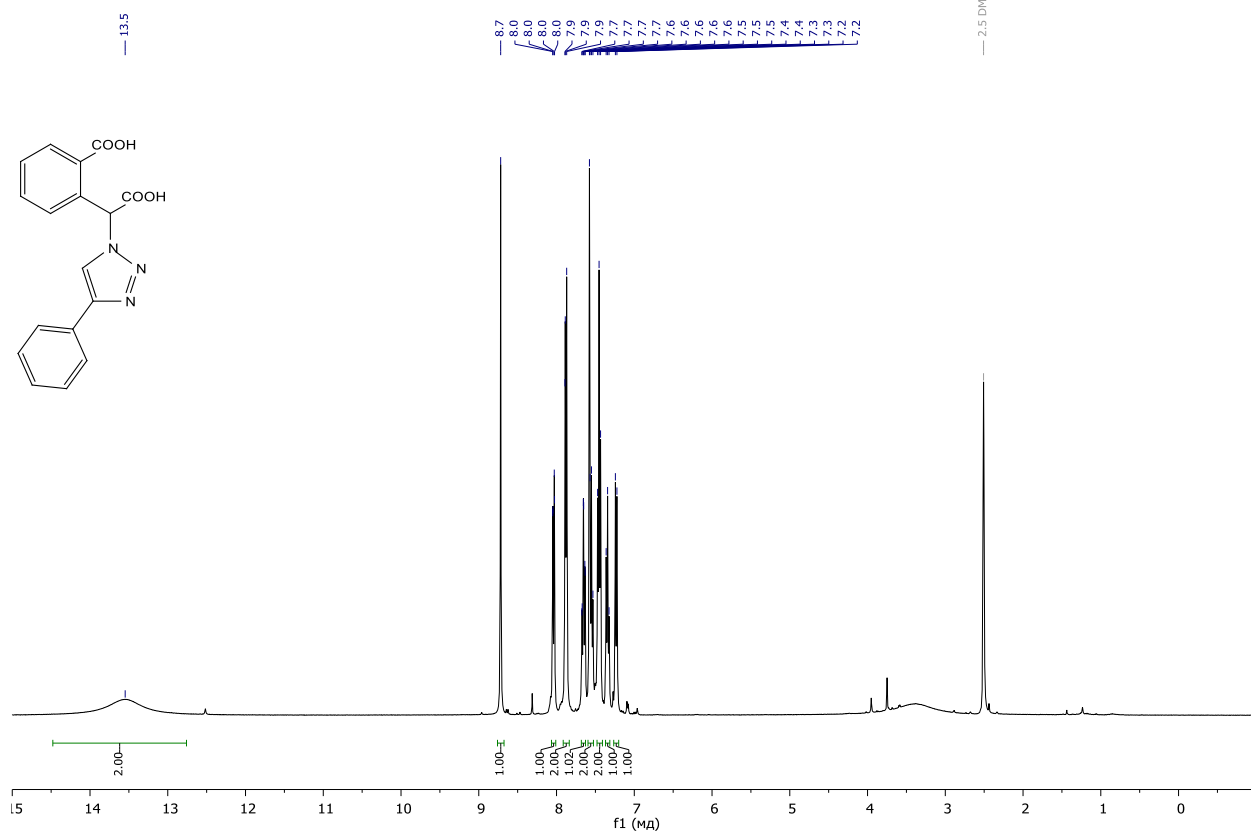

<sup>13</sup>C NMR, 100.61 MHz, DMSO-d<sub>6</sub>

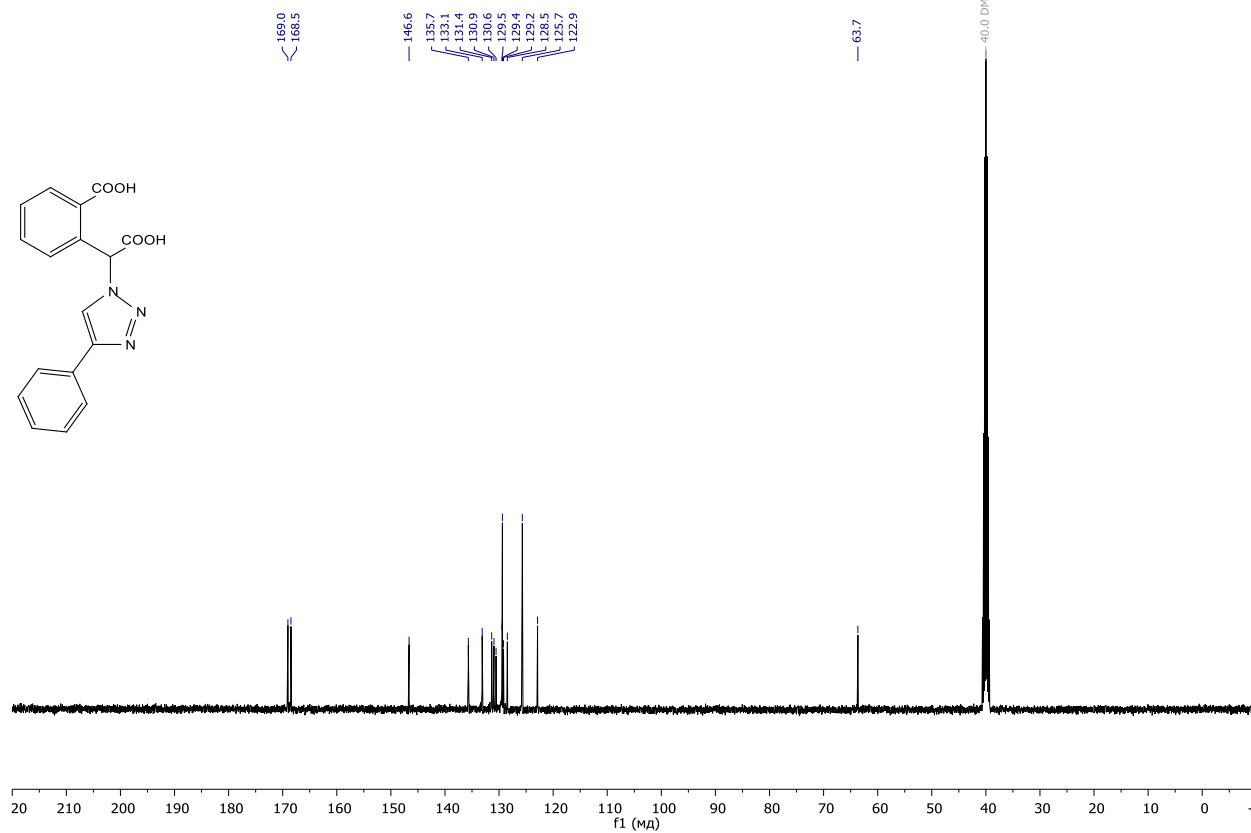

<sup>1</sup>H NMR, 400.13 MHz, DMSO-d<sub>6</sub>

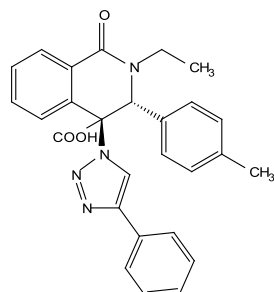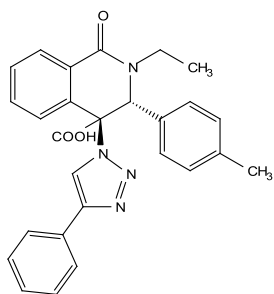

HRMS (ESI/Q-TOF) m/z: [M+H]<sup>+</sup> Calcd for C<sub>25</sub>H<sub>24</sub>NO<sub>3</sub><sup>+</sup> 300.1751; Found 300.1744.

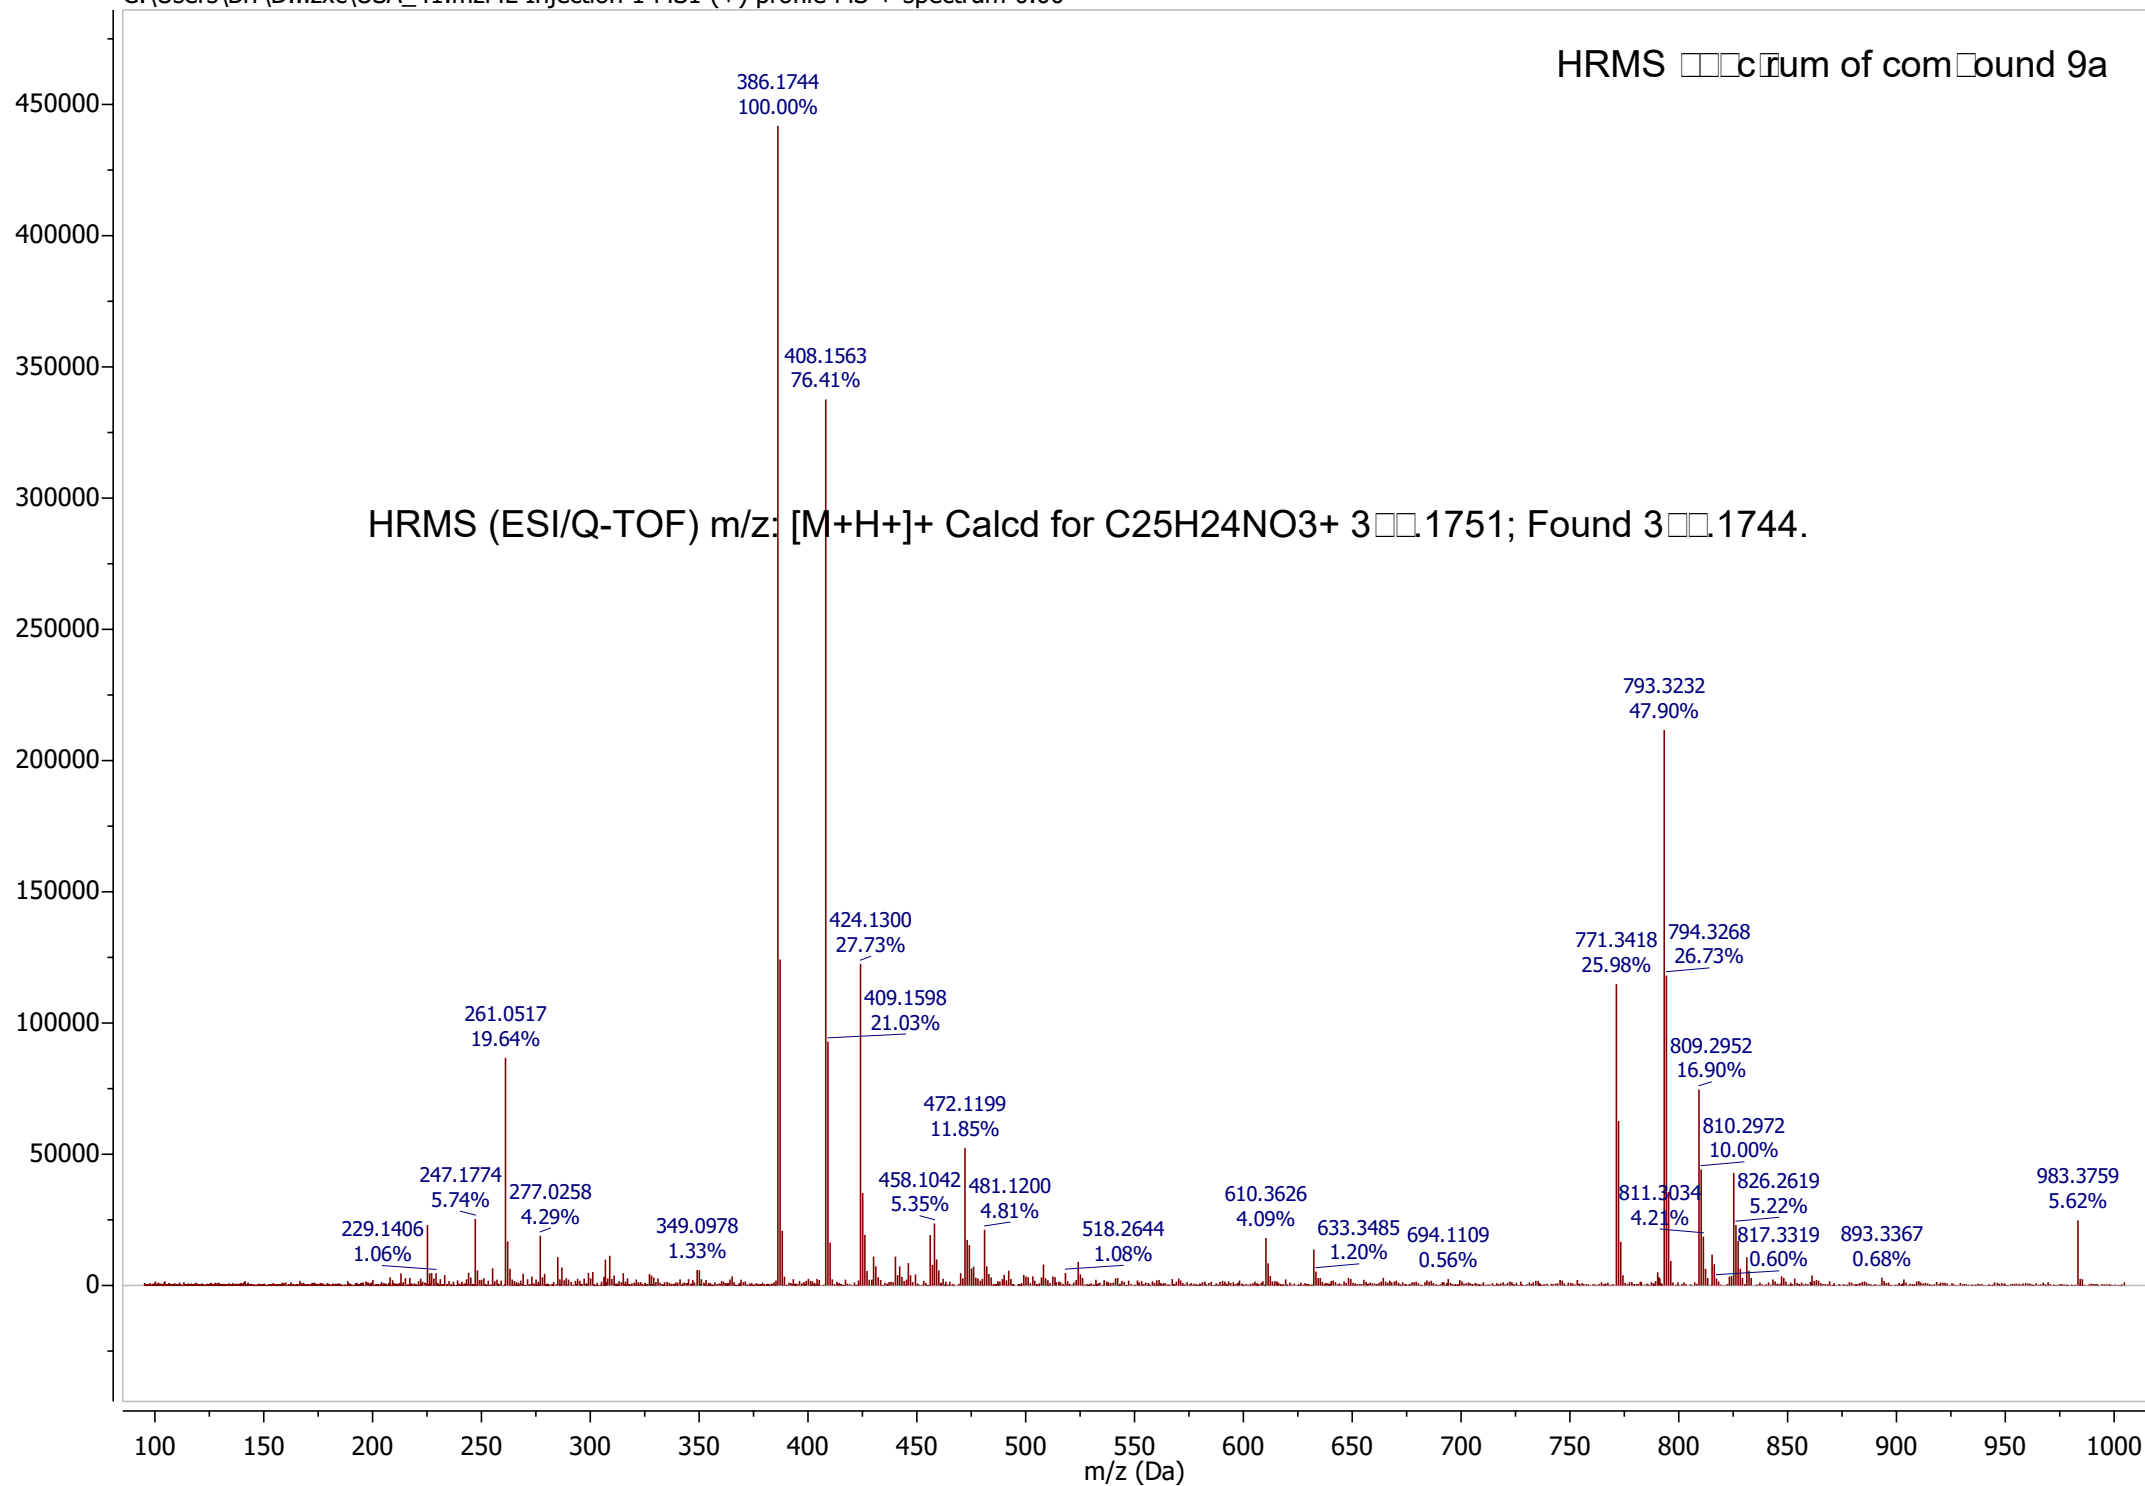

HRMS (ESI/Q-TOF) m/z: [M+H]<sup>+</sup> Calcd for C<sub>25</sub>H<sub>23</sub>N<sub>2</sub>O<sub>5</sub><sup>+</sup> 431.1001; Found 431.1000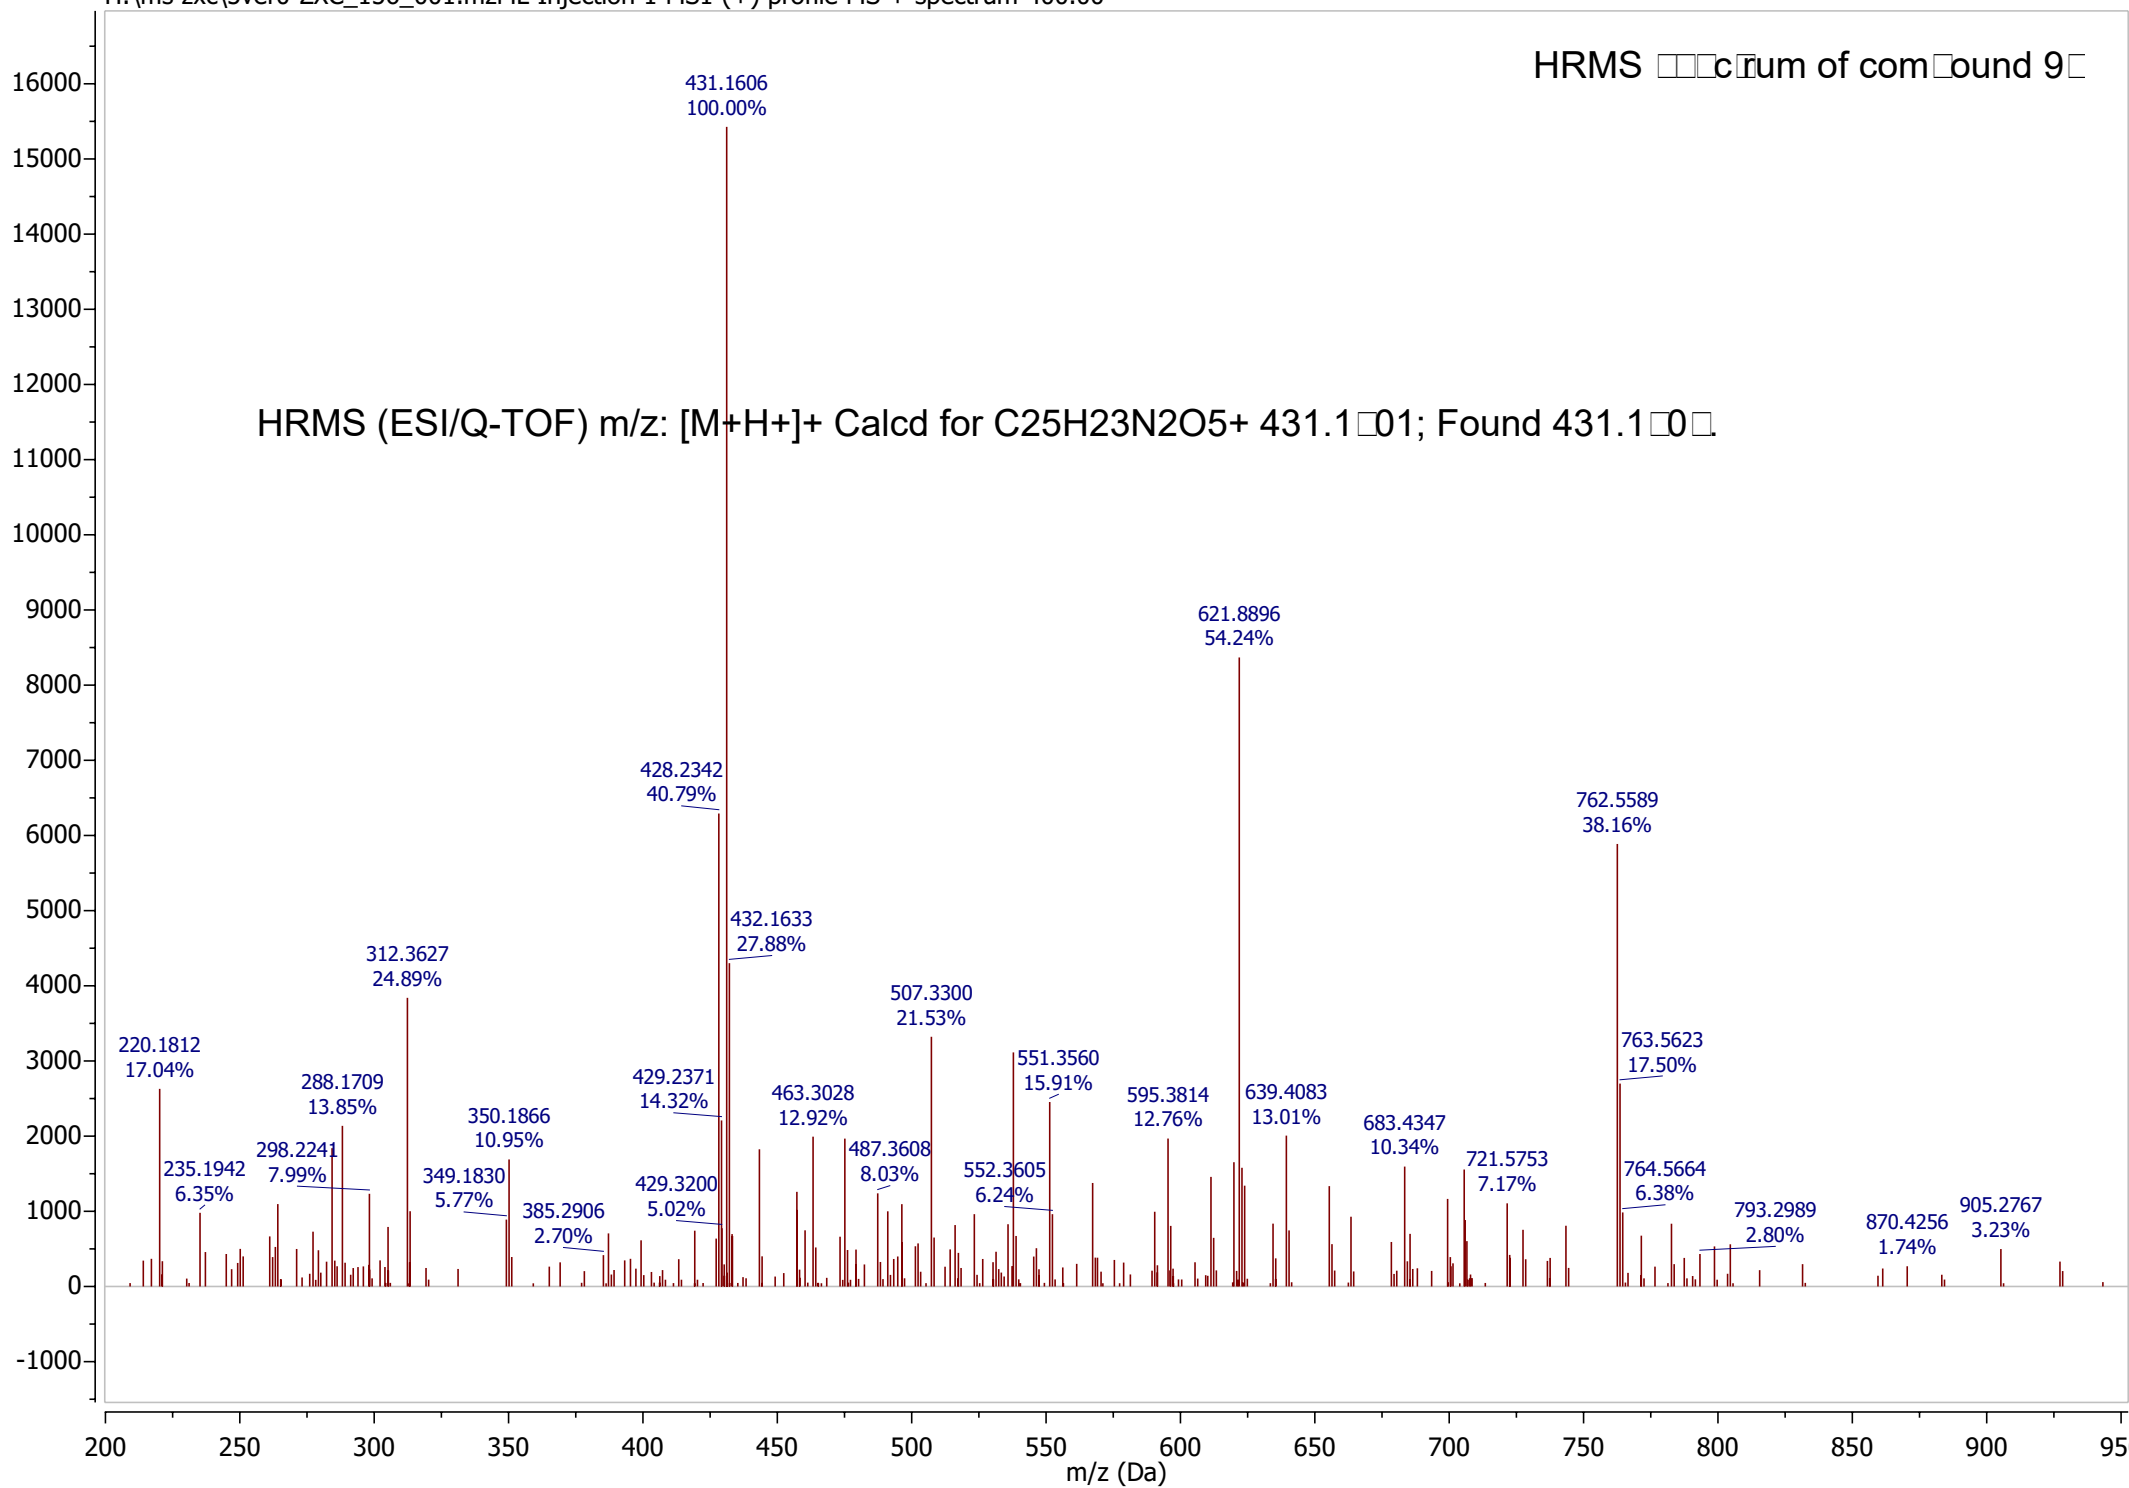



HRMS (ESI/Q-TOF) m/z: [M+Na]<sup>+</sup> Calcd for C<sub>21</sub>H<sub>25</sub>NO<sub>3</sub>Na<sup>+</sup> 422.1727; Found 422.1711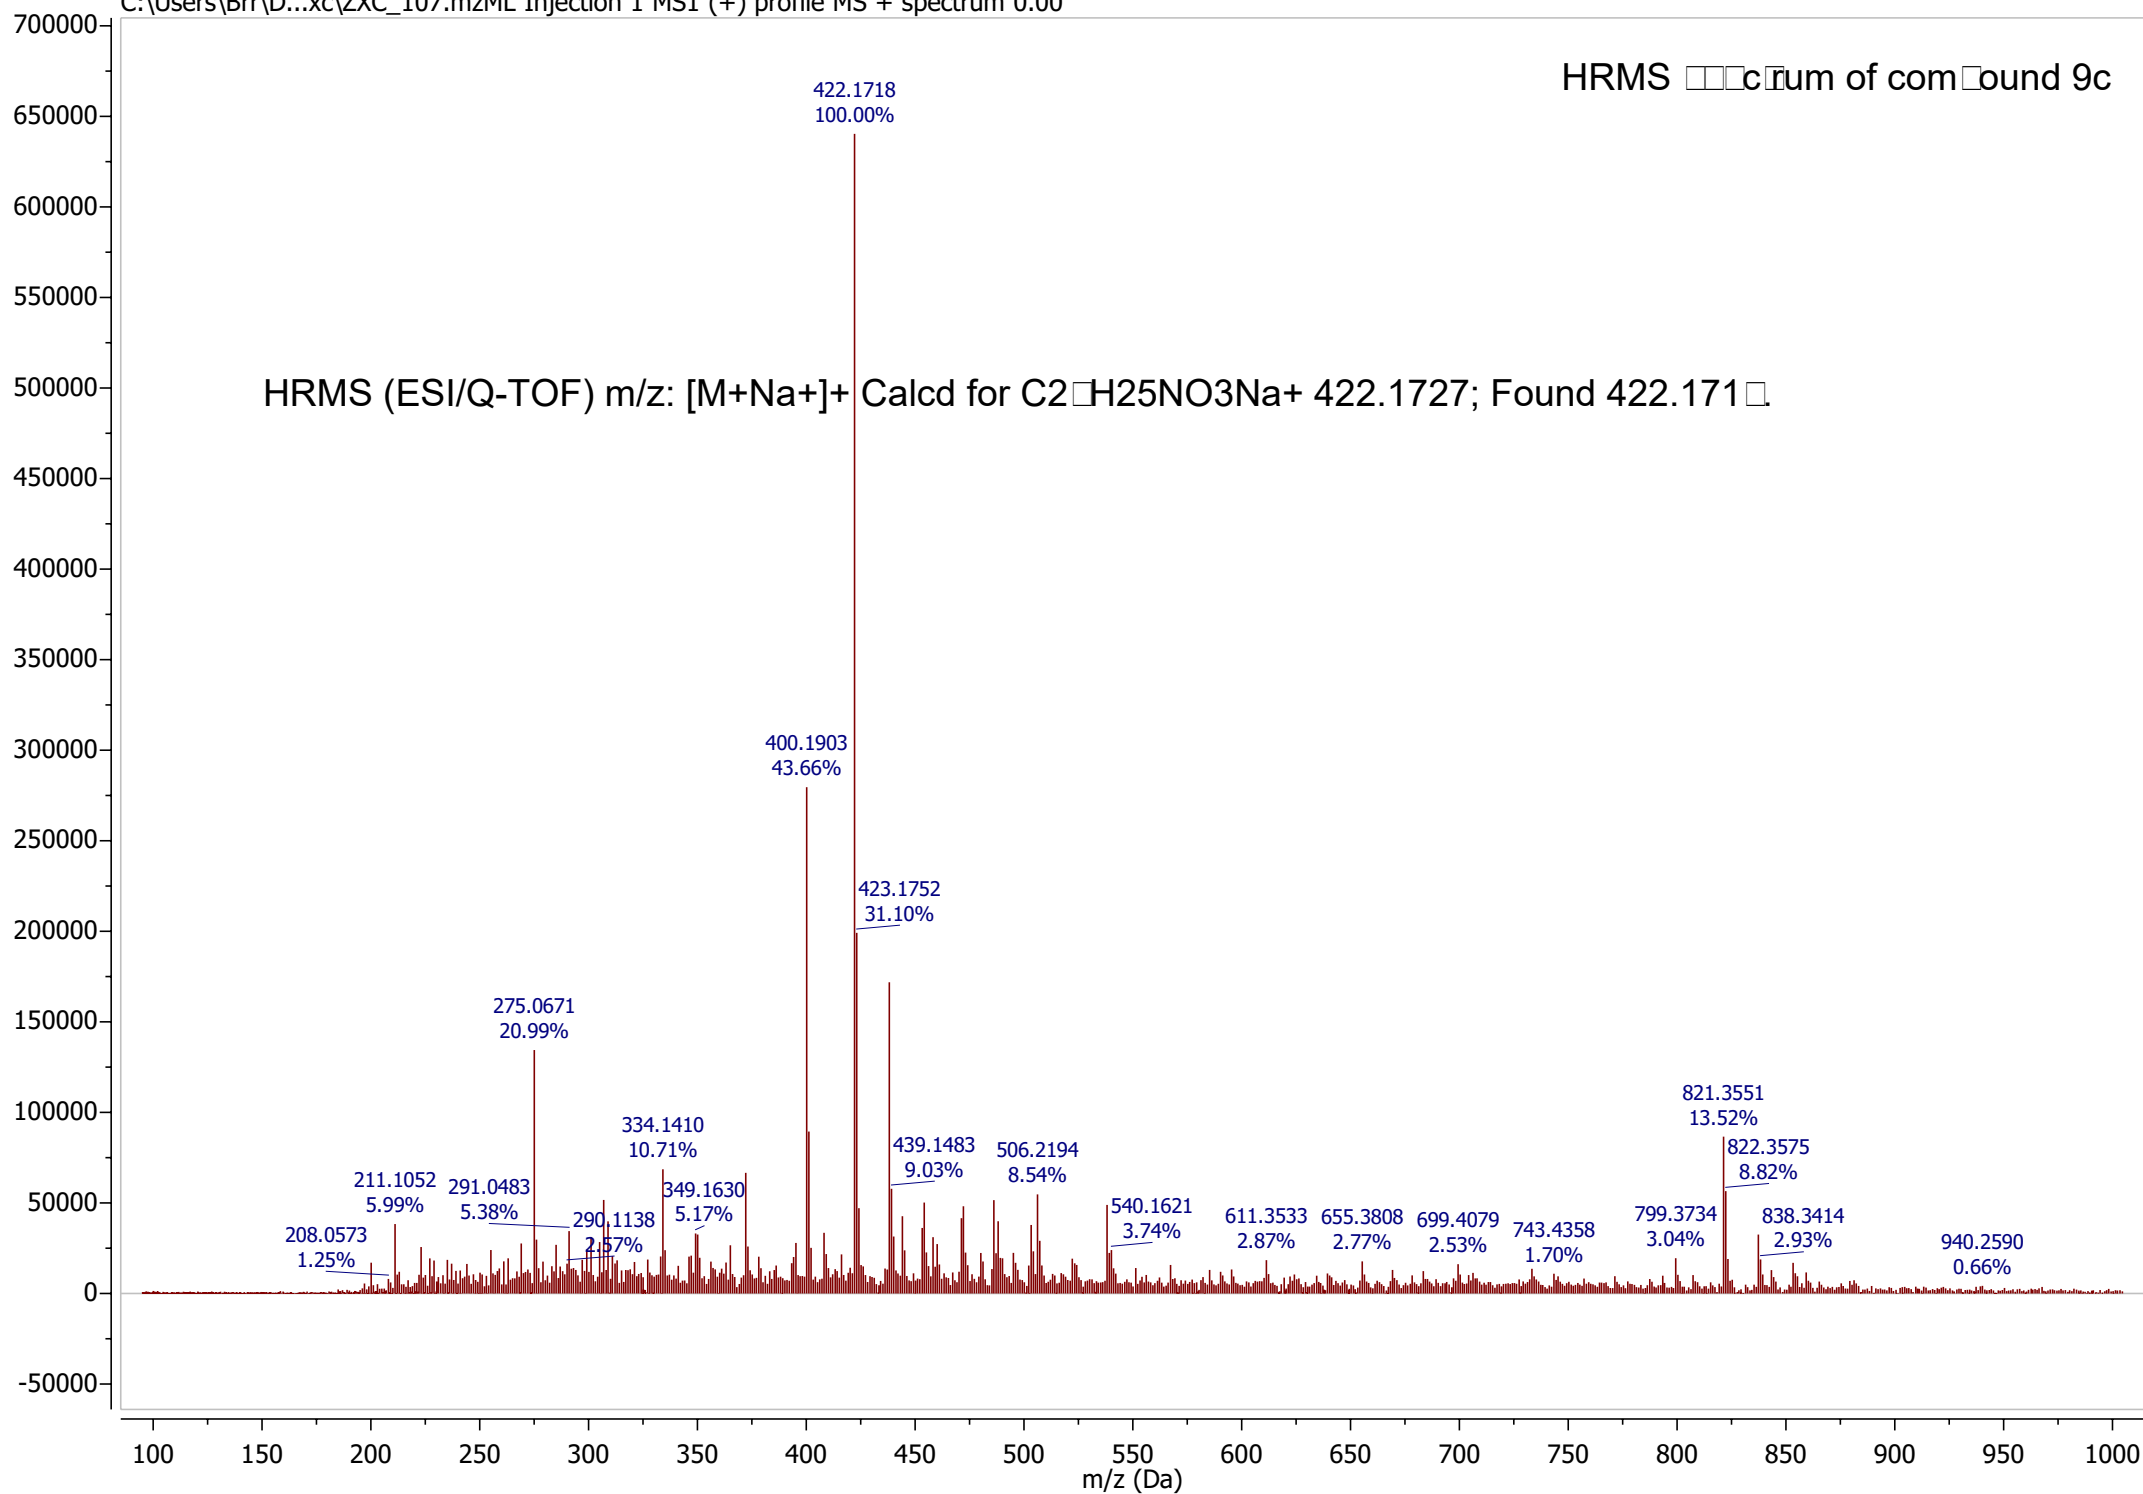

HRMS (ESI/Q-TOF) m/z: [M+H]<sup>+</sup> Calcd for C<sub>21</sub>H<sub>21</sub>NO<sub>4</sub>+ 411.15; Found 411.14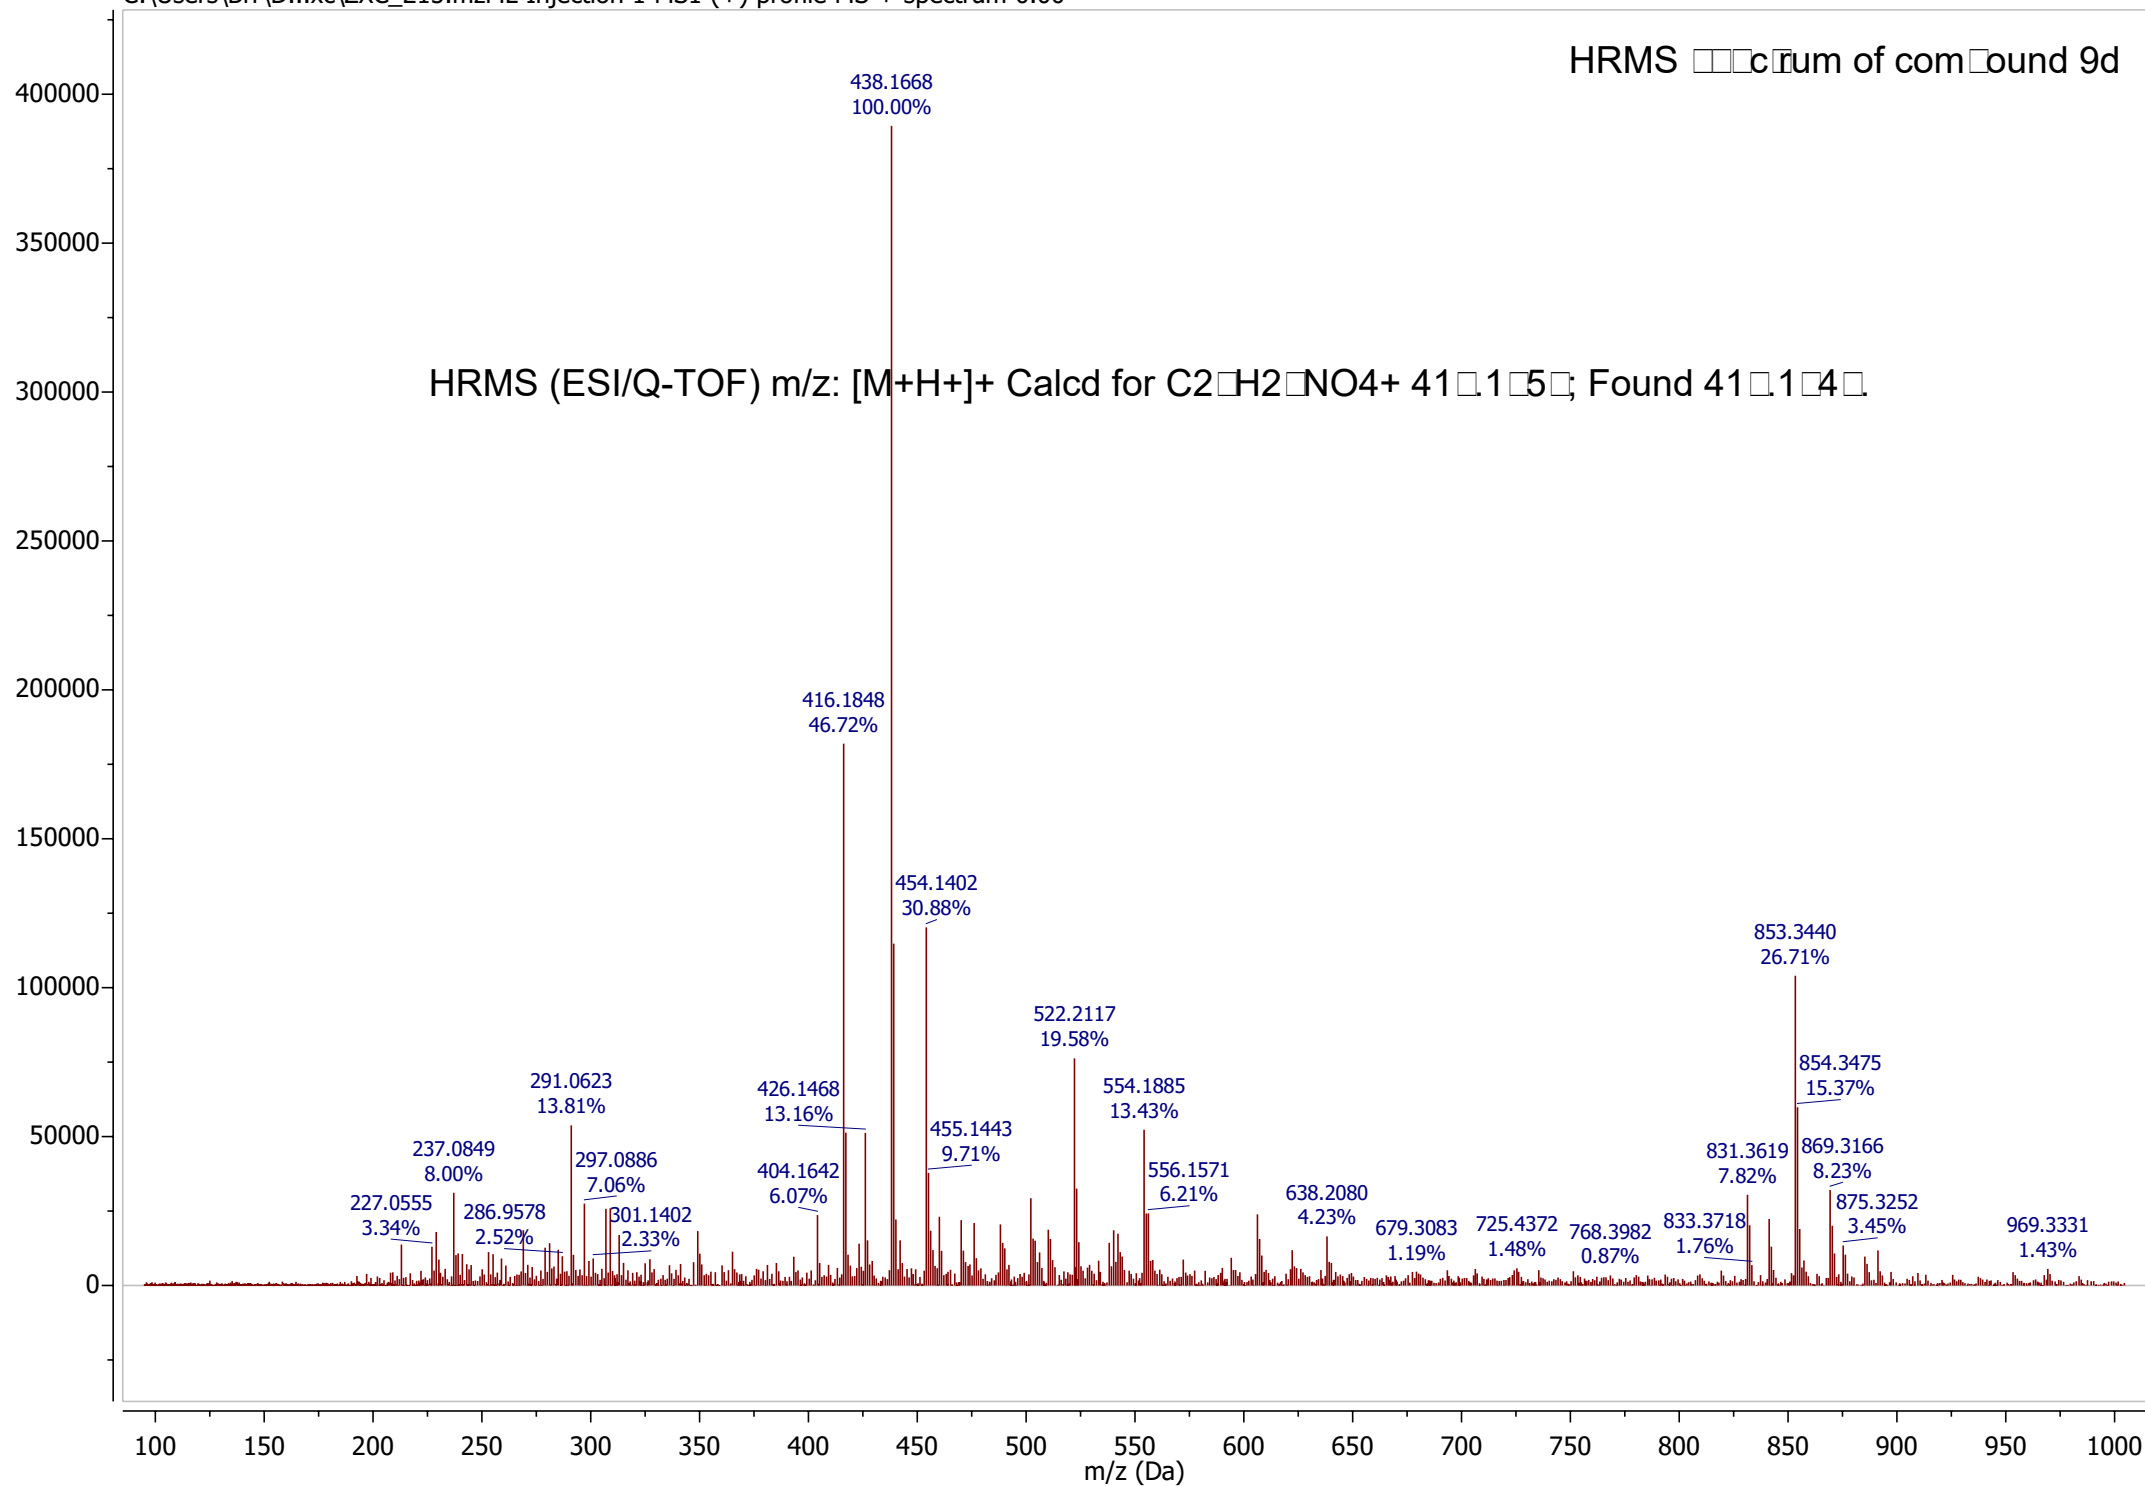

HRMS (ESI/Q-TOF) m/z: [M+H]<sup>+</sup> Calcd for C<sub>25</sub>H<sub>22</sub>Cl<sub>2</sub>NO<sub>3</sub><sup>+</sup> 454.0971; Found 454.0915.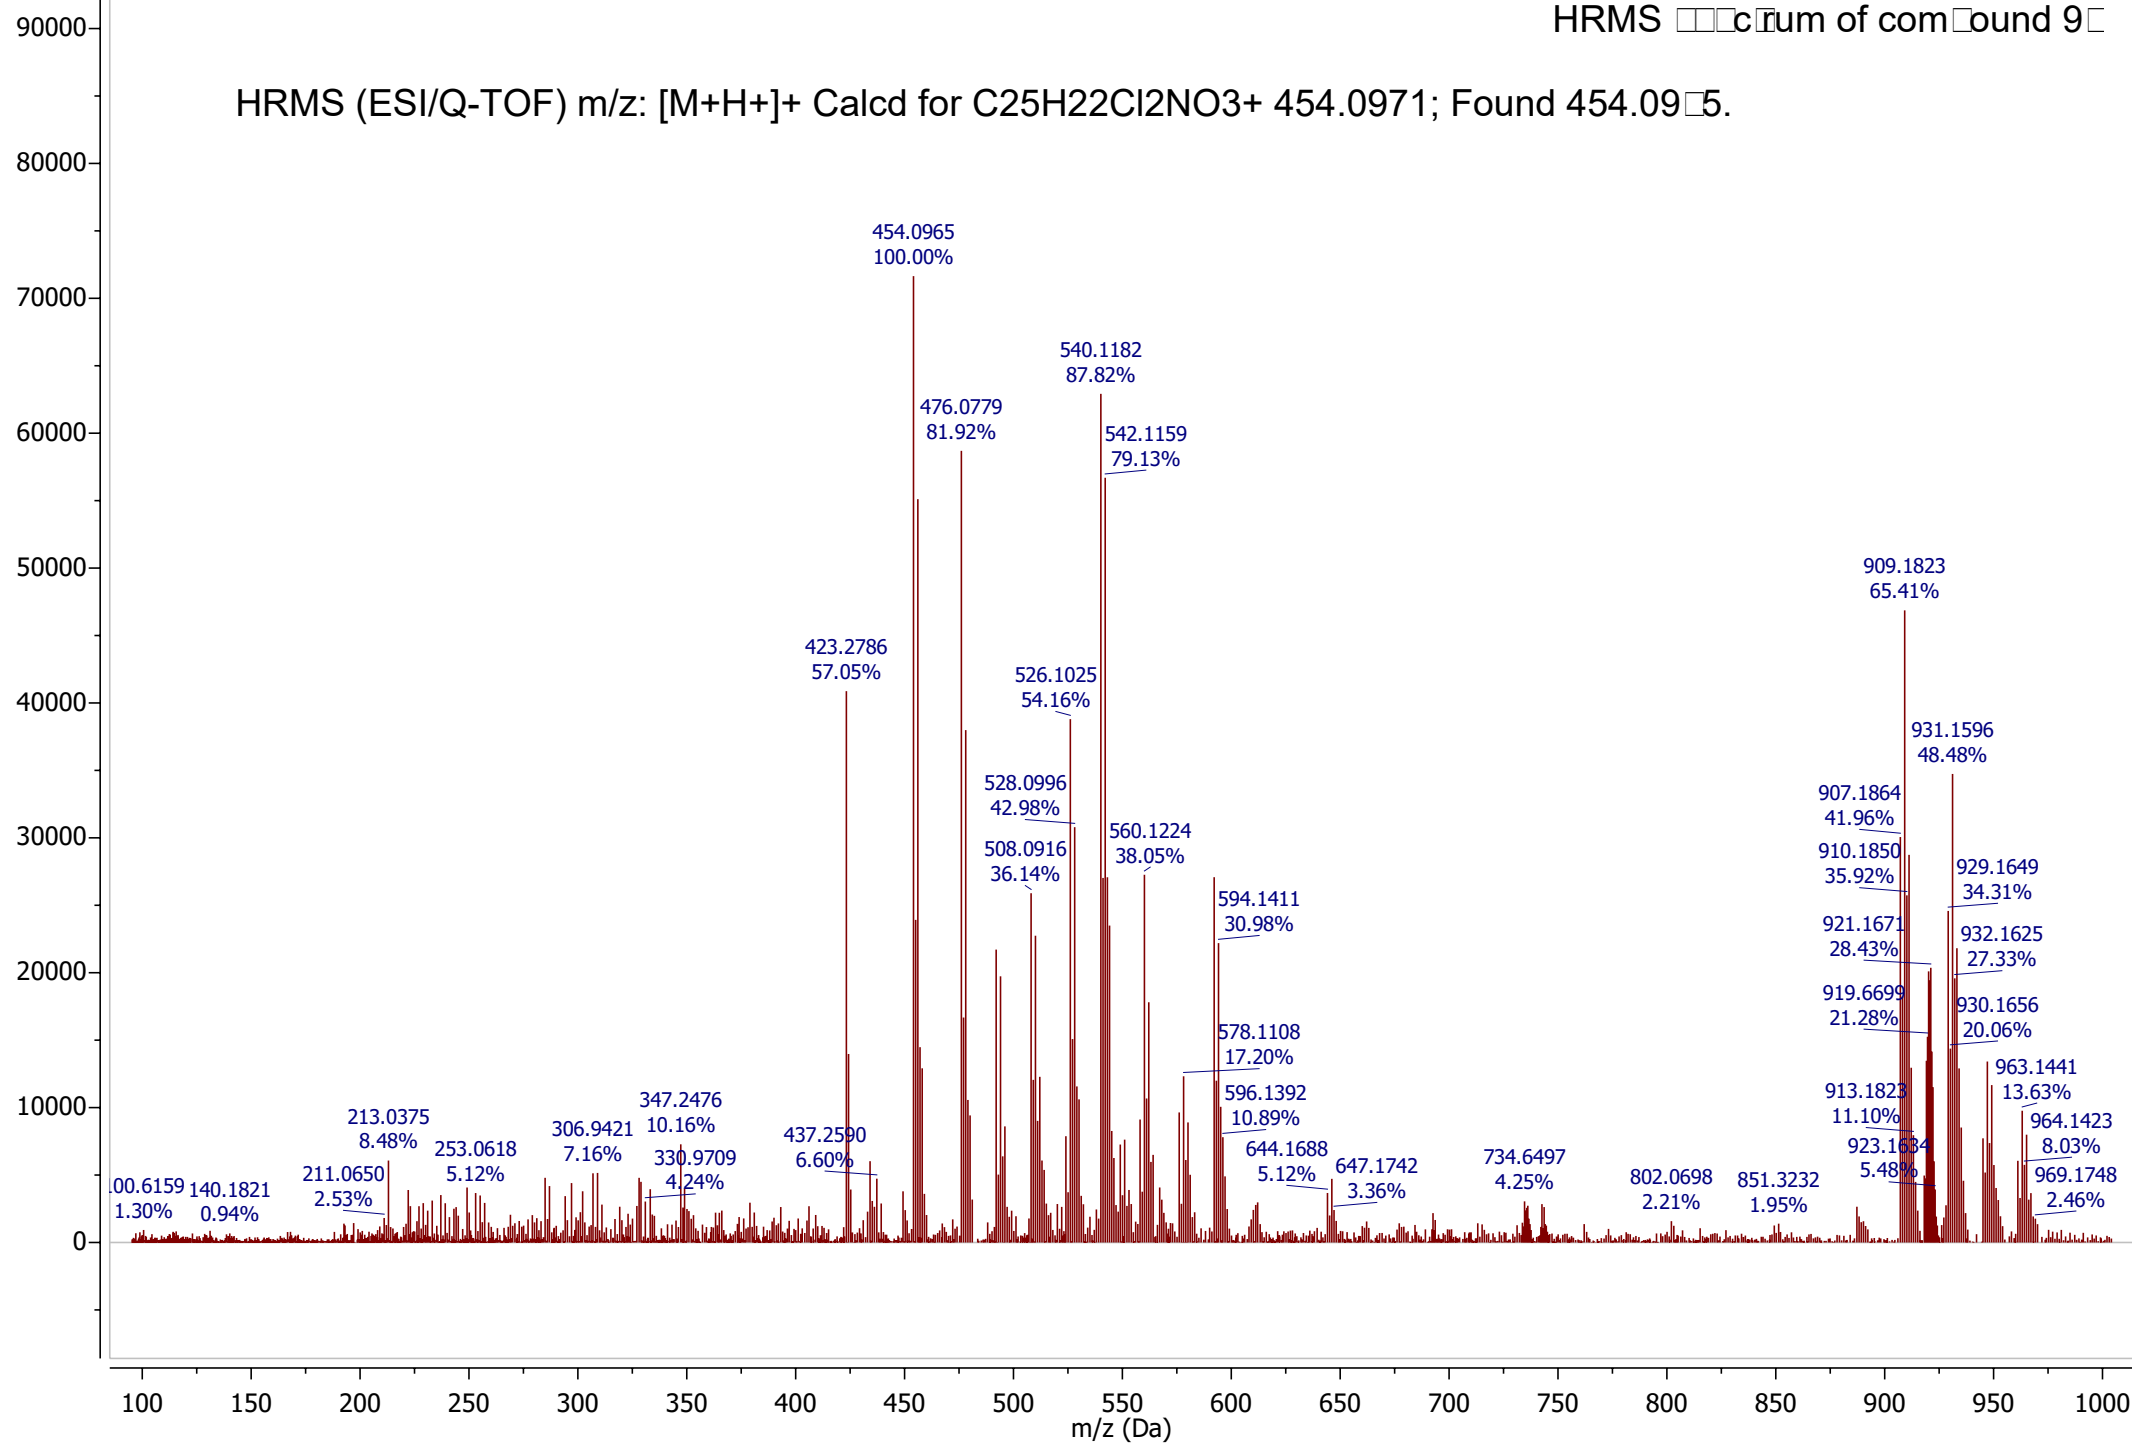

HRMS (ESI/Q-TOF) m/z: [M+H]<sup>+</sup> Calcd for C<sub>33</sub>H<sub>27</sub>ClNO<sub>5</sub>+ 552.1572; Found 552.1574.

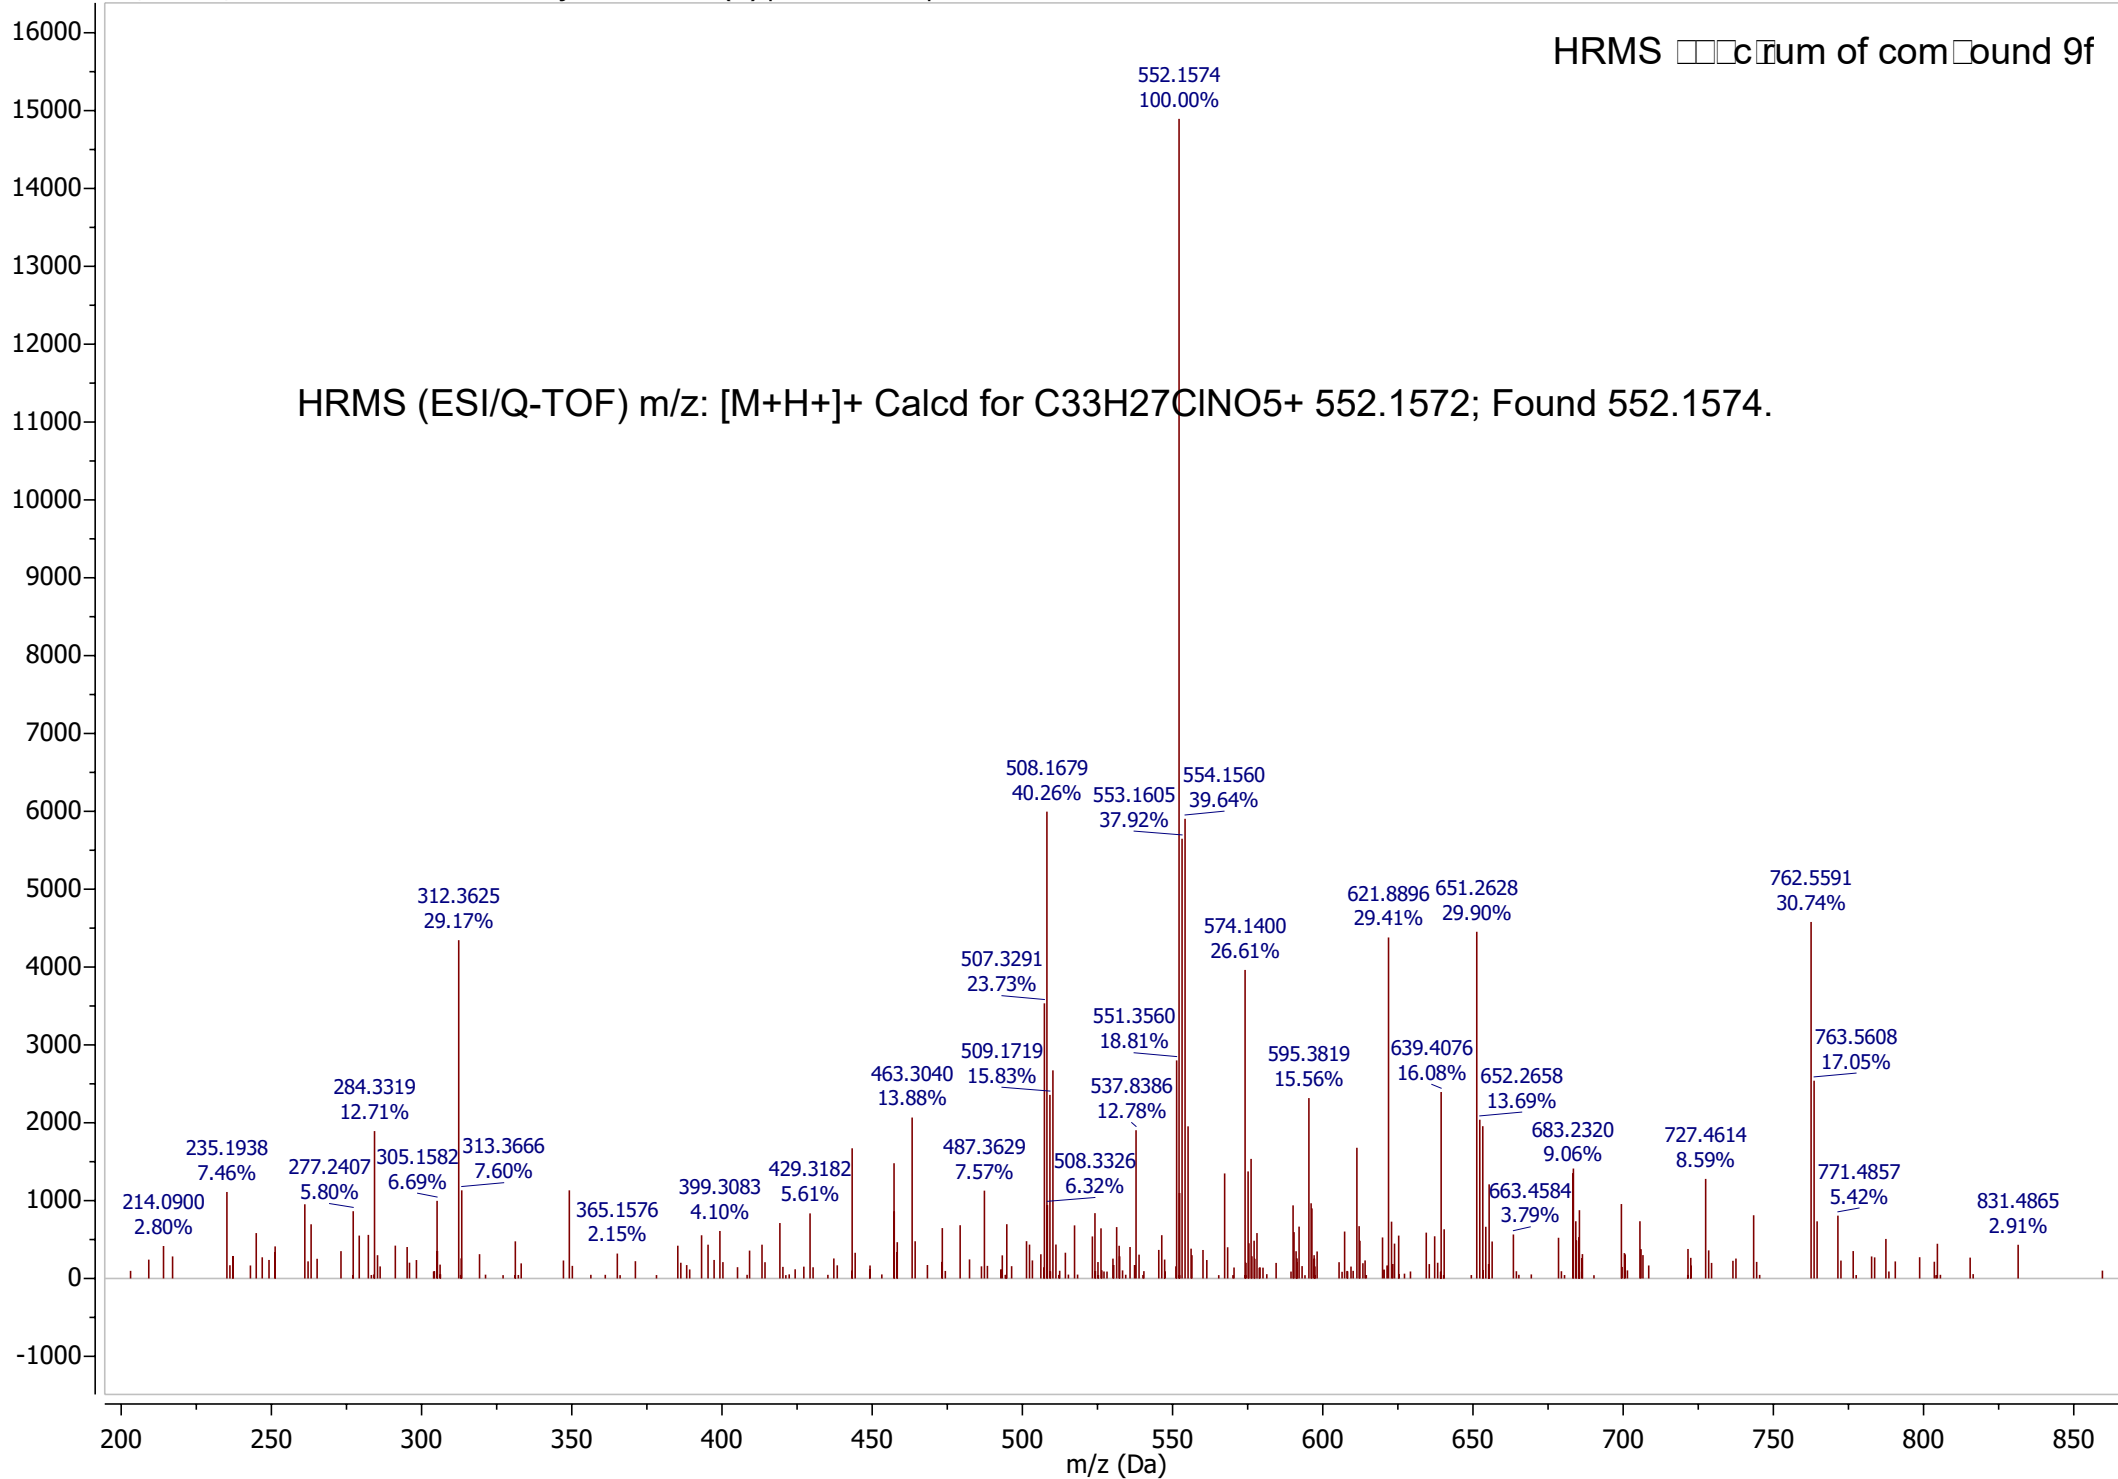

HRMS (ESI/Q-TOF) m/z: [M+H]<sup>+</sup> Calcd for C<sub>30</sub>H<sub>25</sub>ClNO<sub>4</sub><sup>+</sup> 491.1417; Found 491.1471.

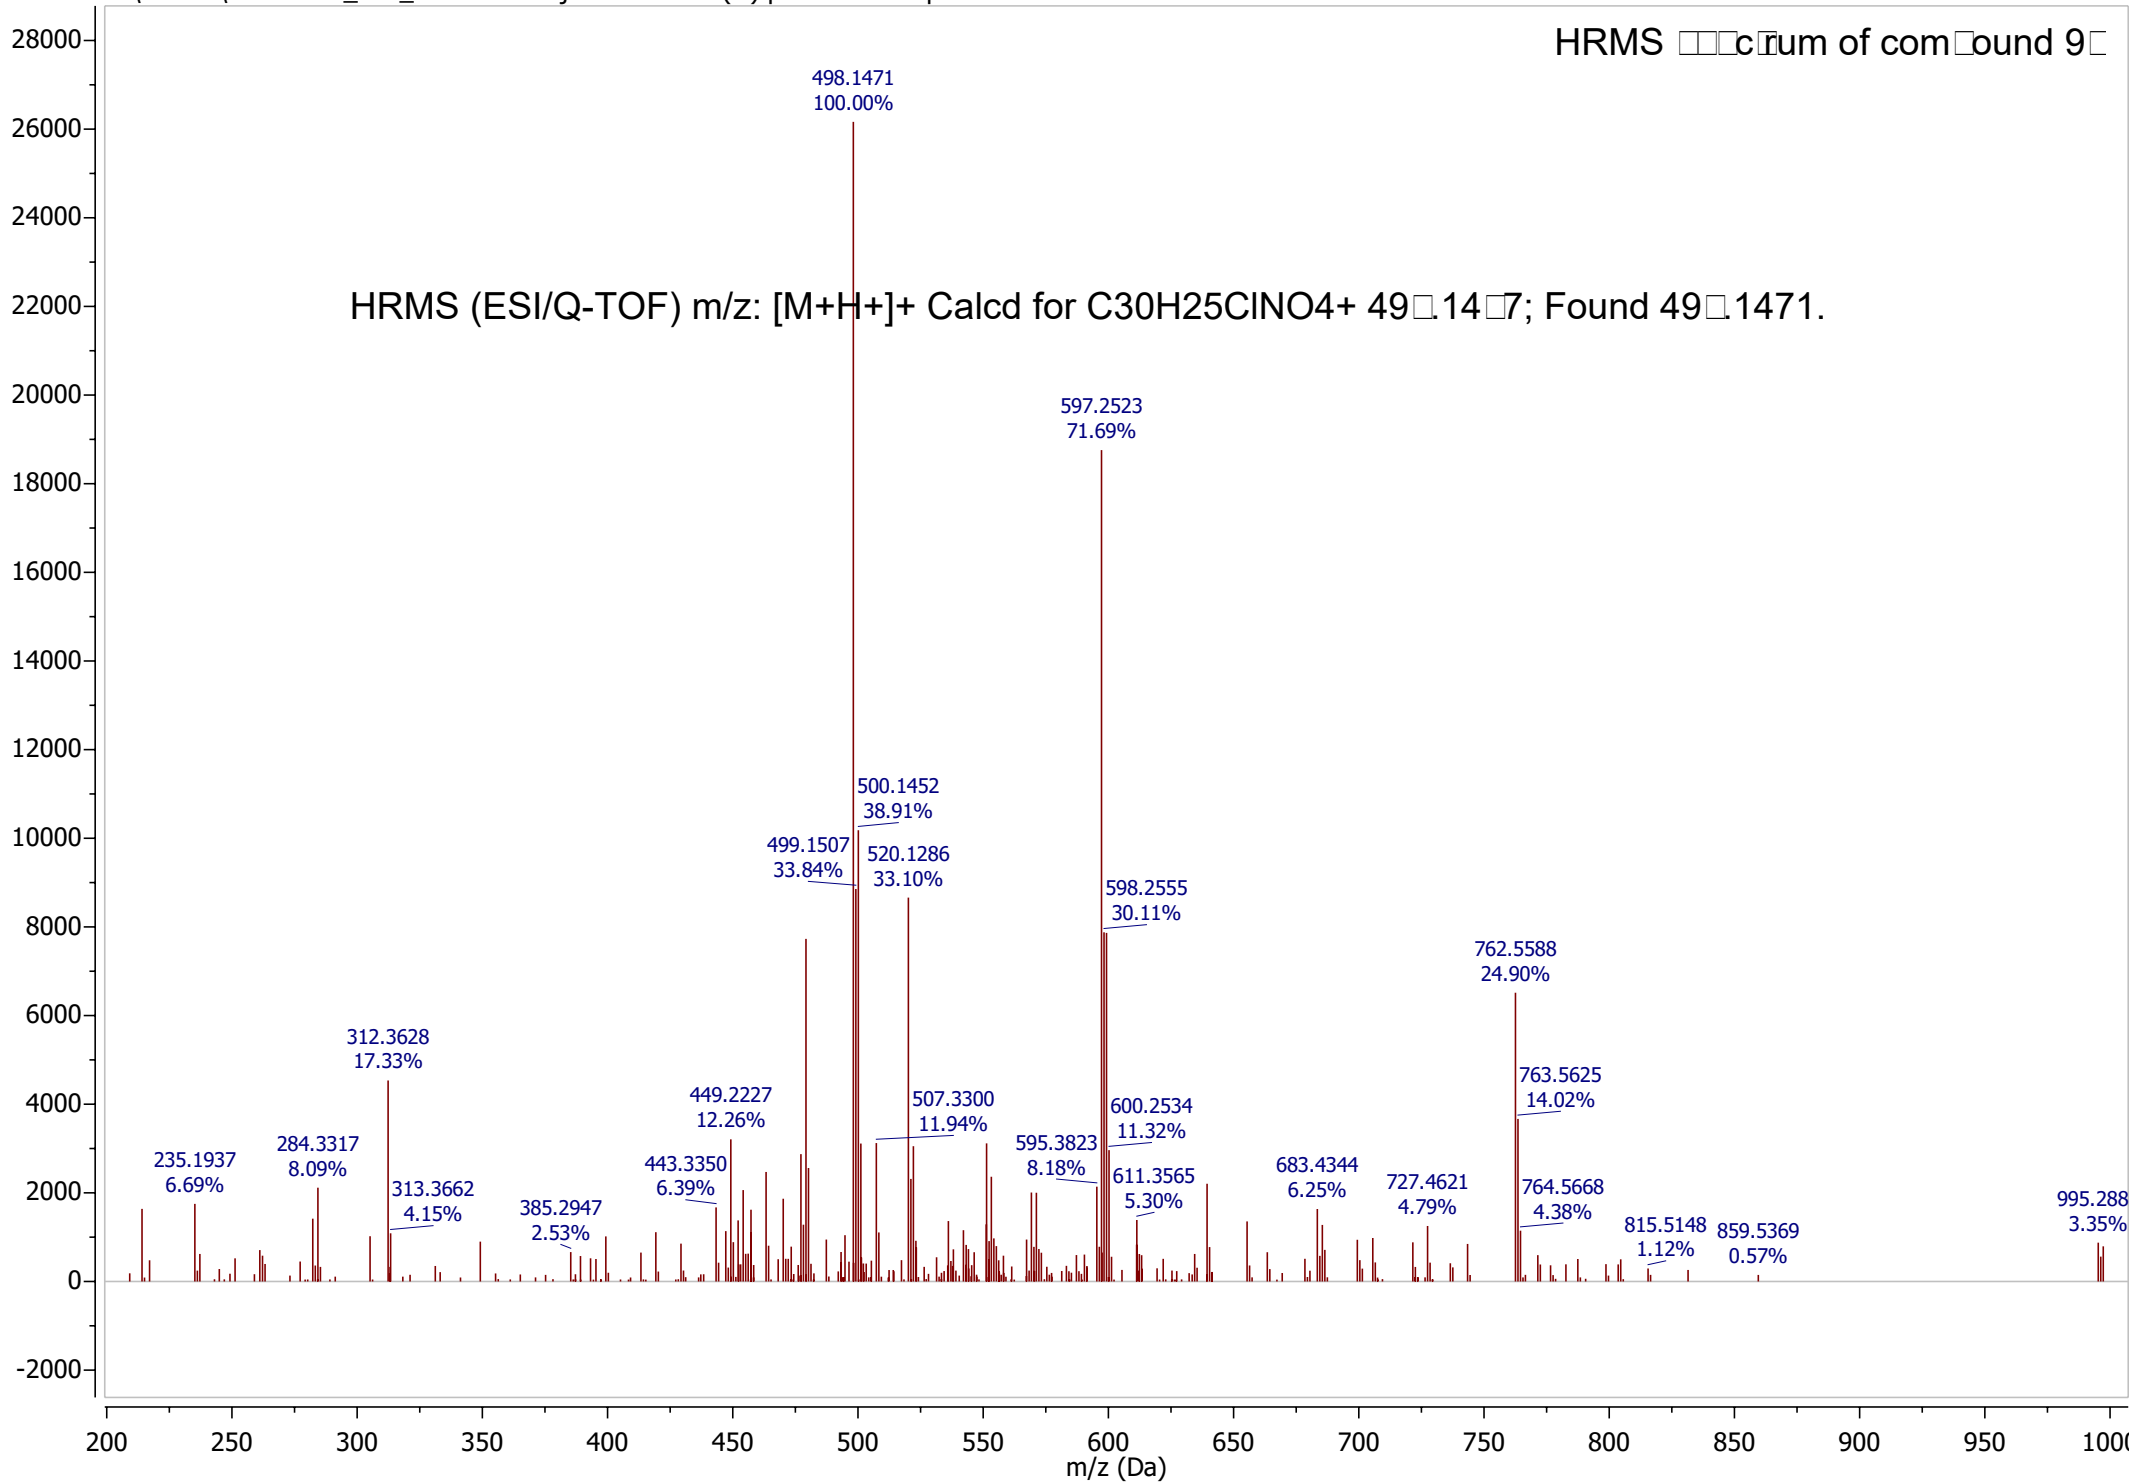

HRMS (ESI/Q-TOF) m/z: [M+H]<sup>+</sup> Calcd for C<sub>27</sub>H<sub>25</sub>ClNO<sub>5</sub>+ 478.141; Found 478.1421.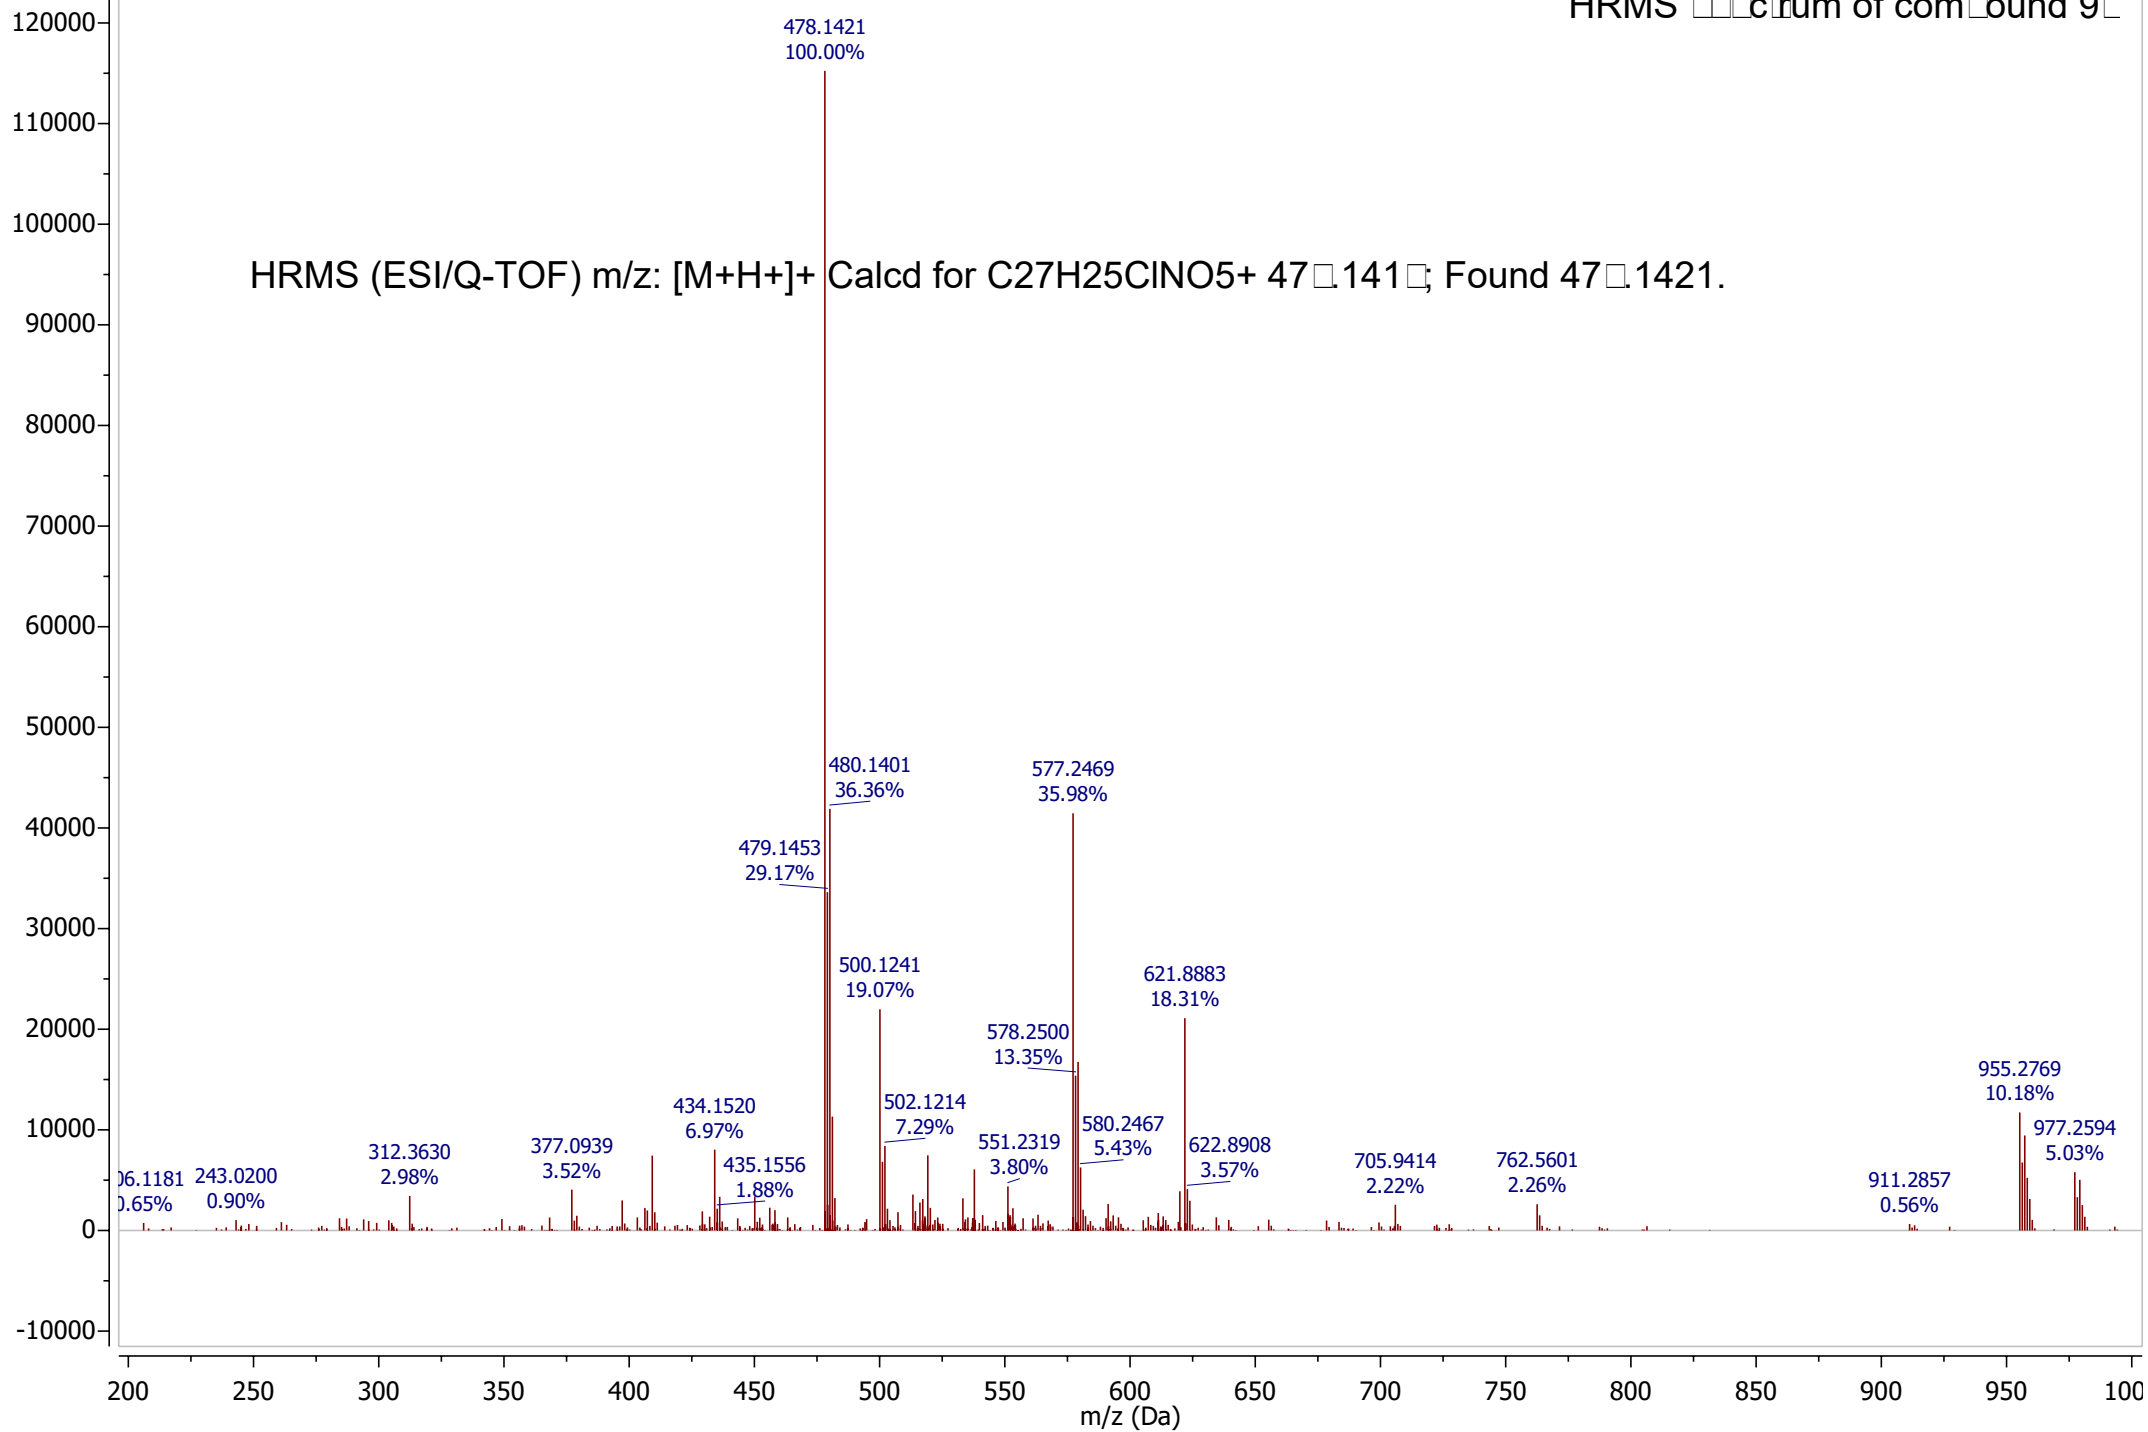

HRMS (ESI/Q-TOF) m/z: [M+H]<sup>+</sup>+ Calcd for C<sub>29</sub>H<sub>23</sub>ClNO<sub>3</sub>+ 4  $\square\square$  13  $\square\square$ ; Found 4  $\square\square$  13  $\square\square$ 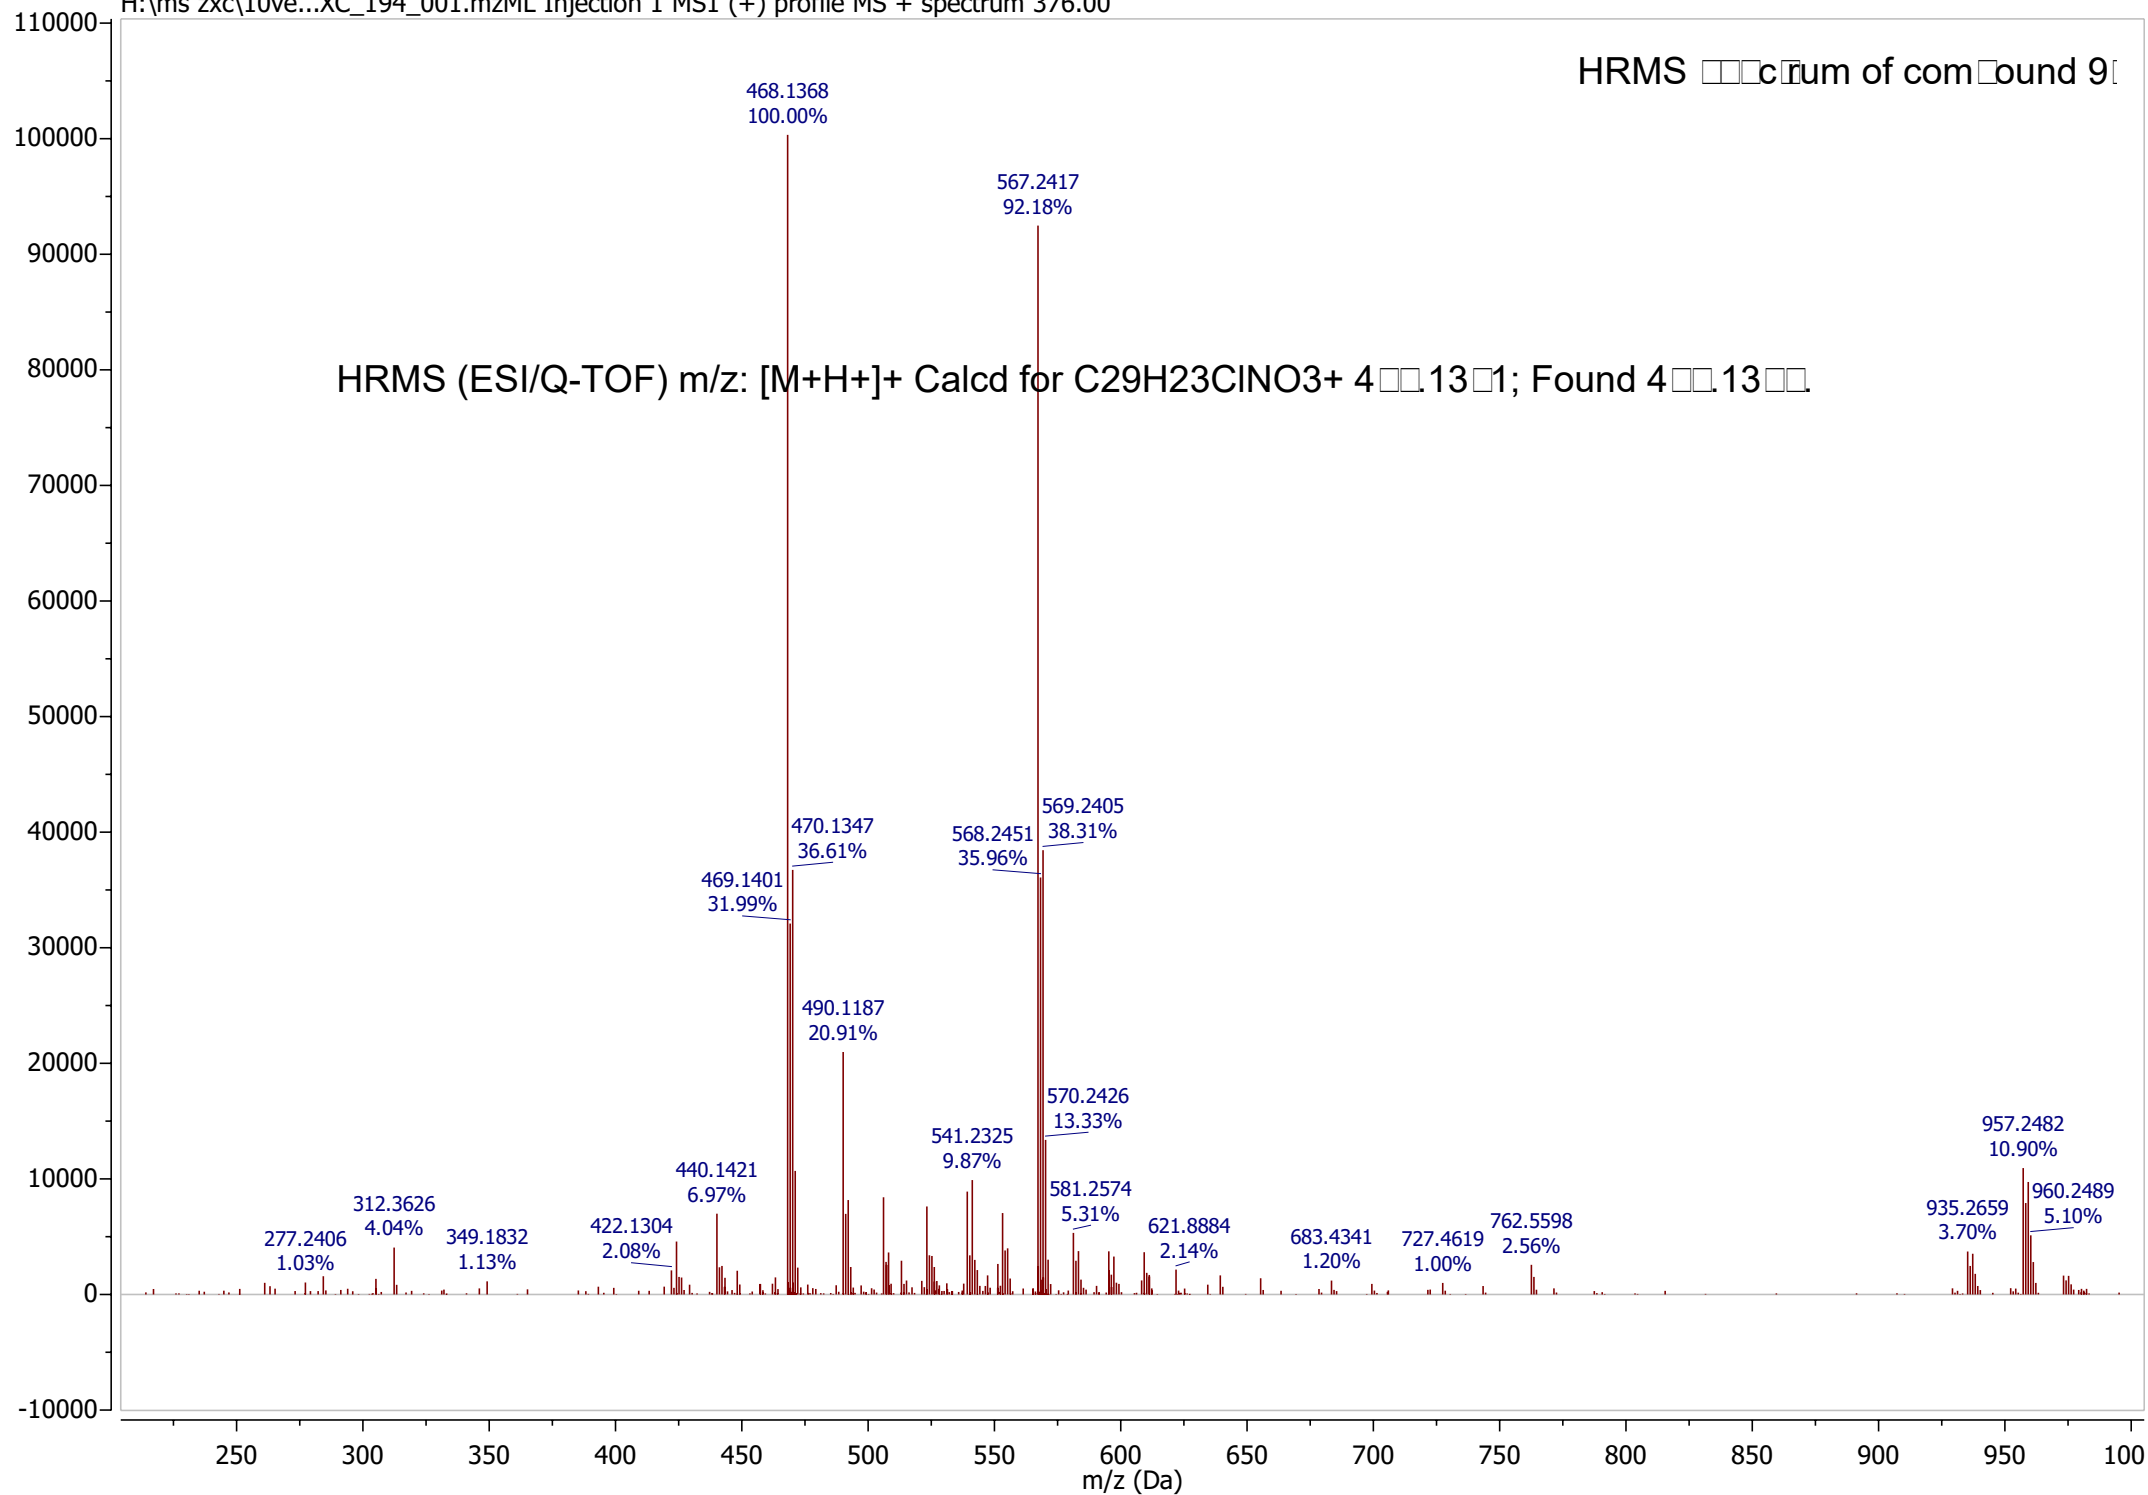

HRMS (ESI/Q-TOF) m/z: [M+H]<sup>+</sup> Calcd for C<sub>30</sub>H<sub>22</sub>ClF<sub>3</sub>NO<sub>4</sub>+ 552.114; Found 552.114.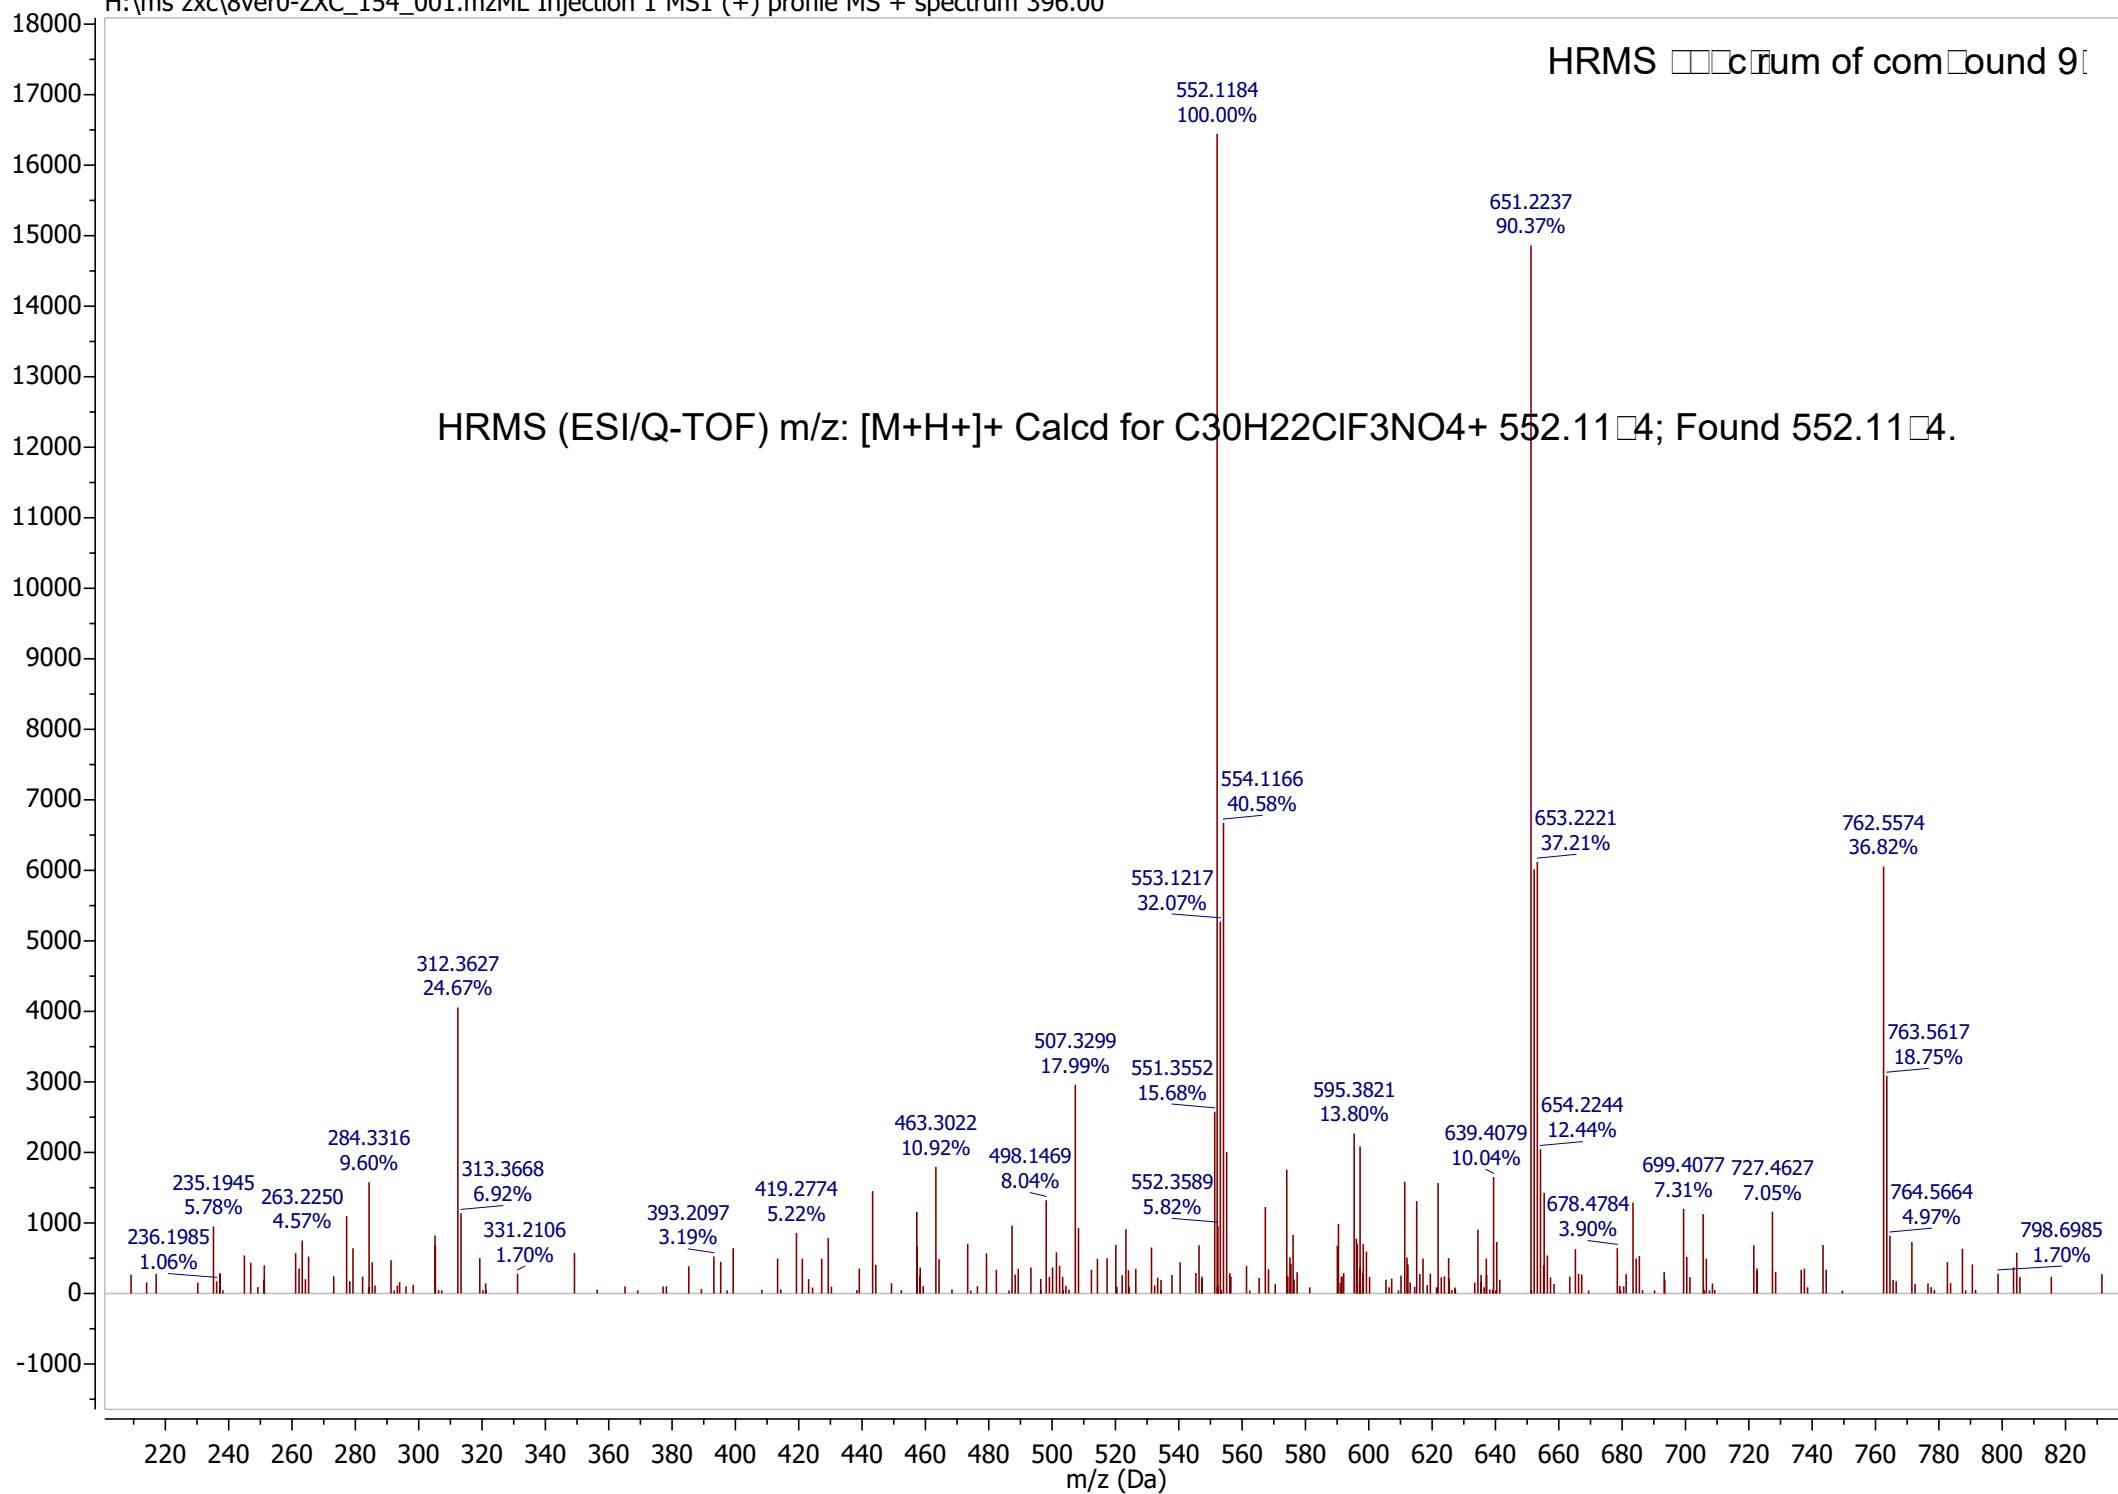



HRMS (ESI/Q-TOF) m/z: [M+H]<sup>+</sup> Calcd for C<sub>27</sub>H<sub>21</sub>ClNO<sub>3</sub>S<sup>+</sup> 474.0925; Found 474.092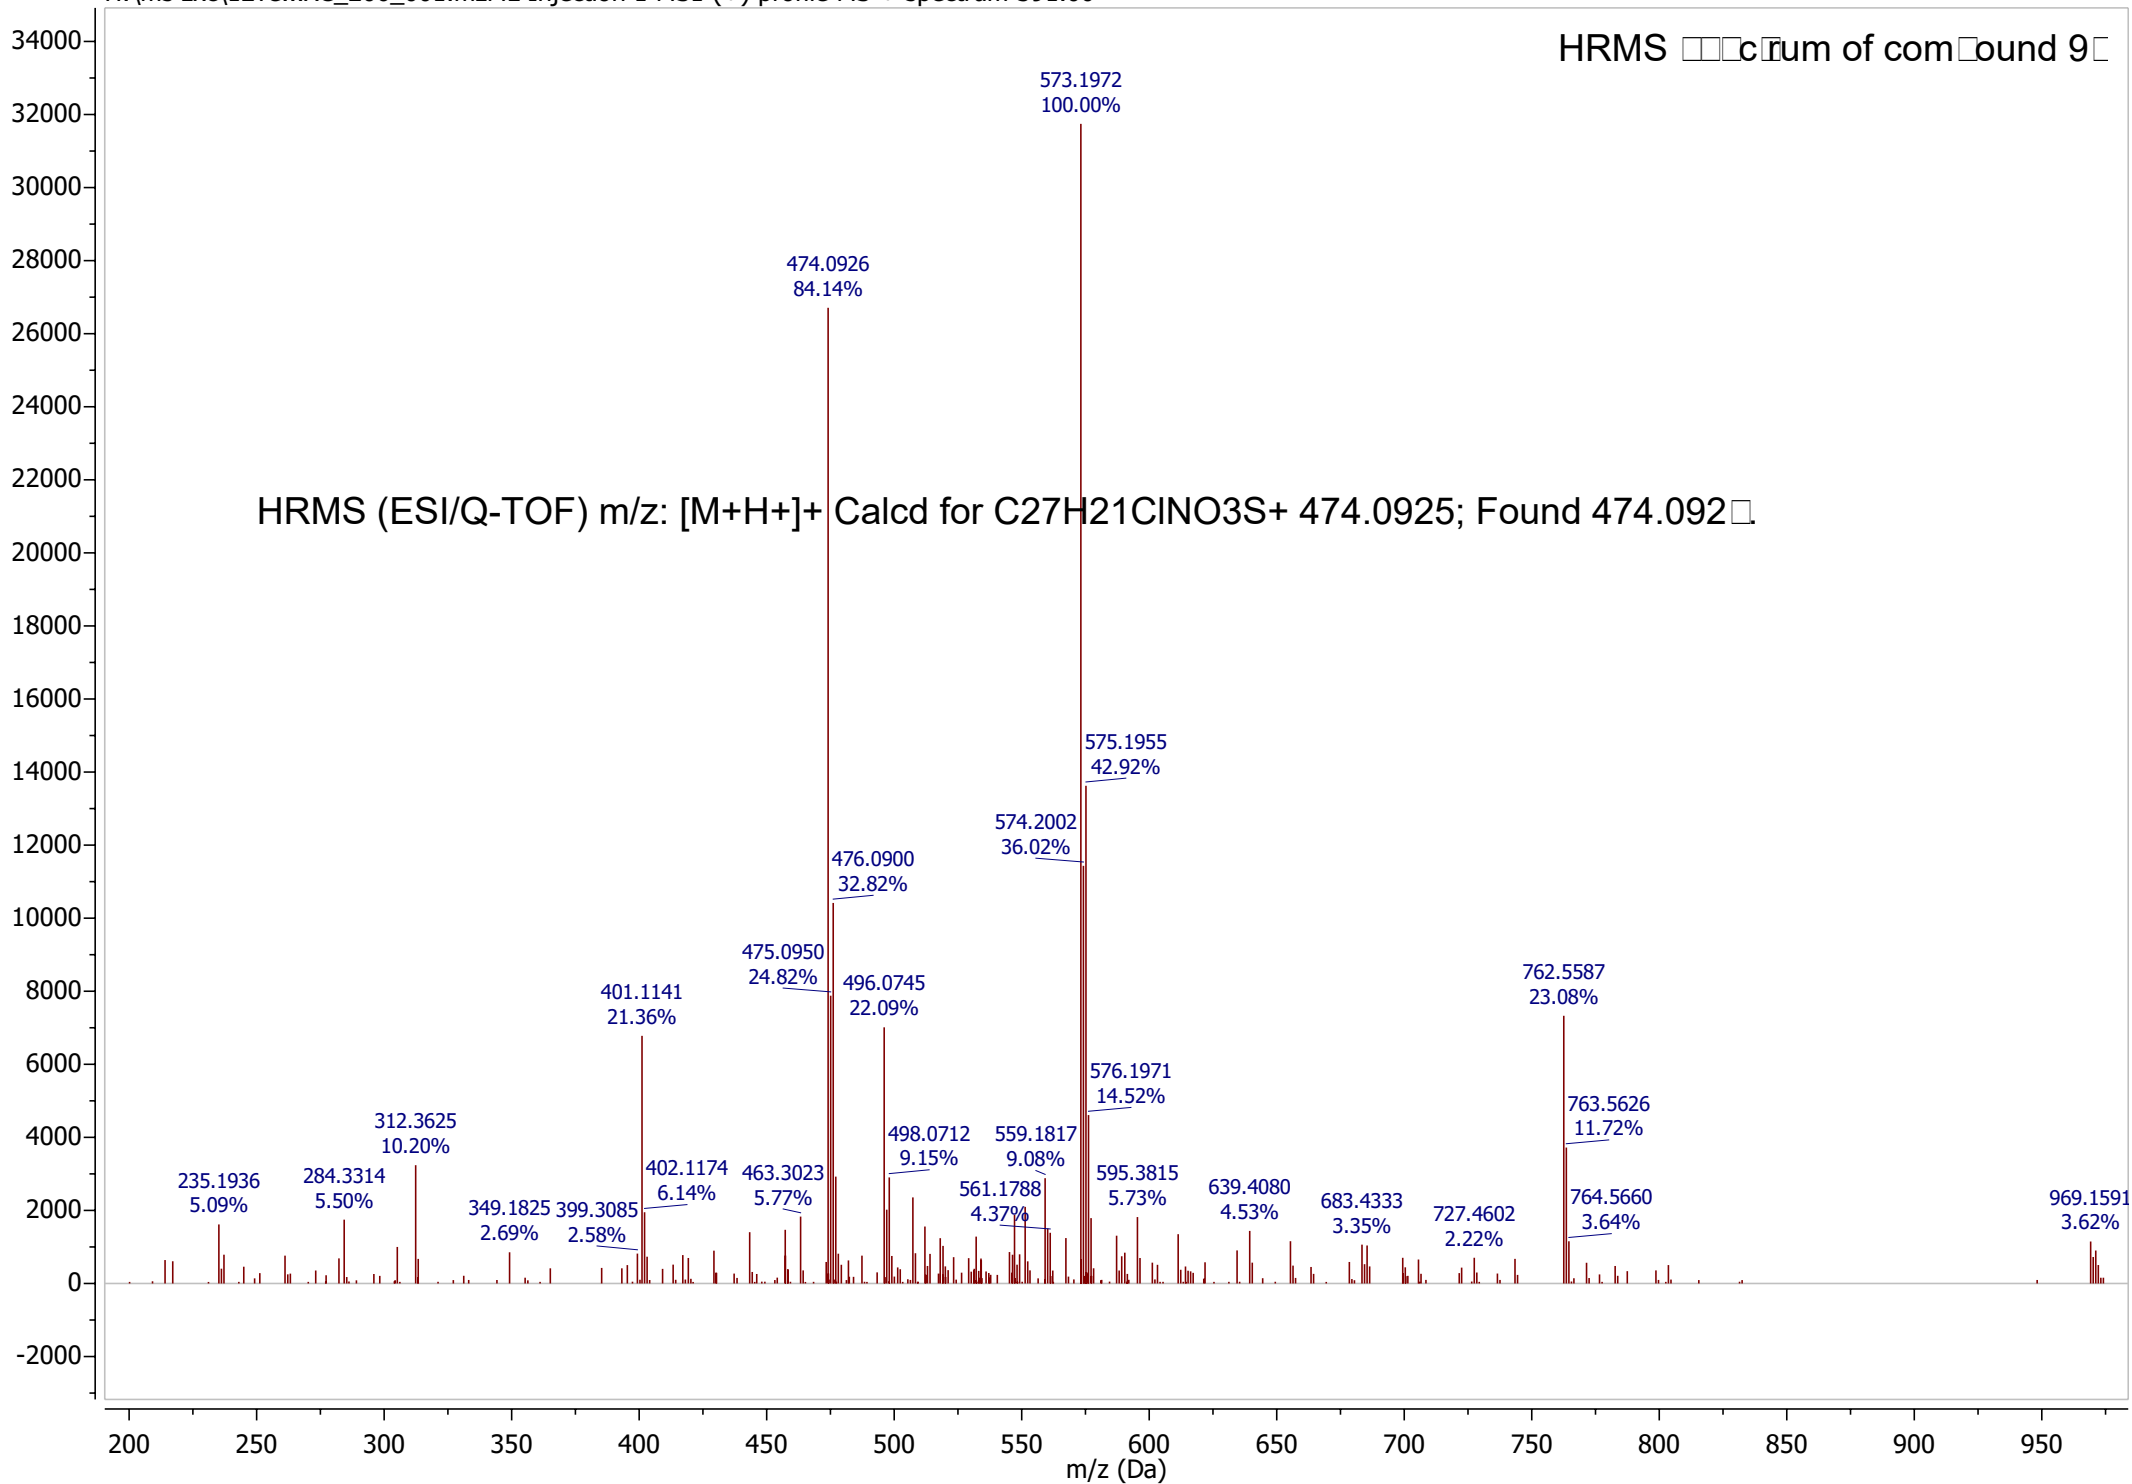

HRMS (ESI/Q-TOF) m/z: [M+H]<sup>+</sup> Calcd for C<sub>30</sub>H<sub>24</sub>ClFNO<sub>4</sub><sup>+</sup> 514.1372; Found 514.1373.

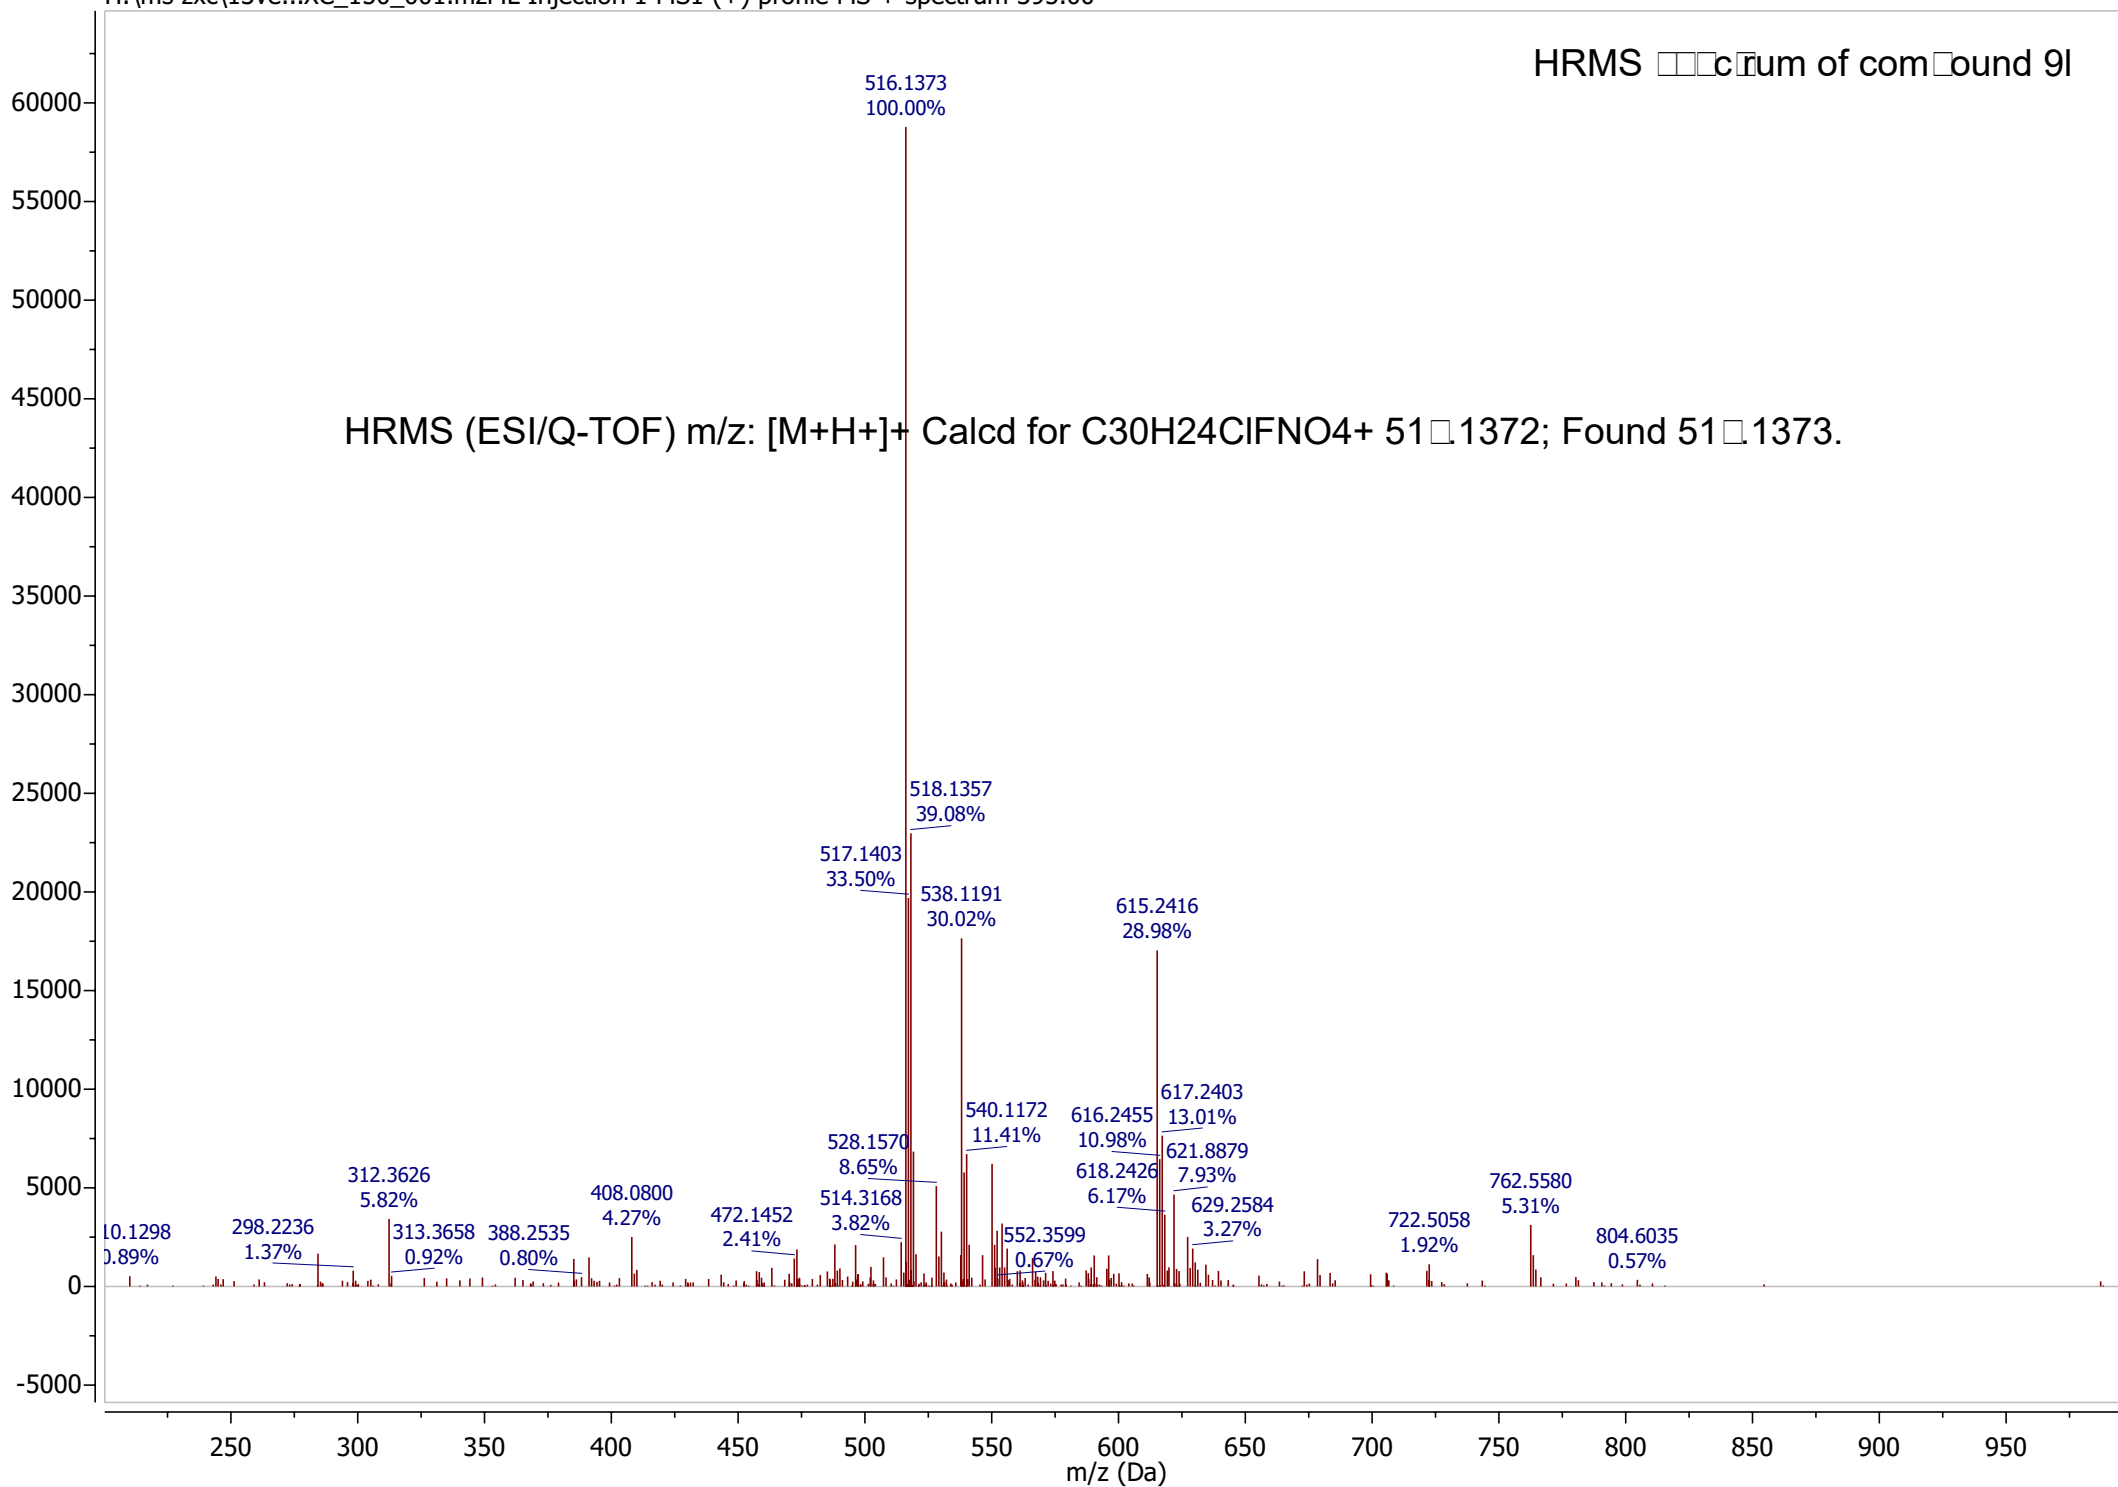

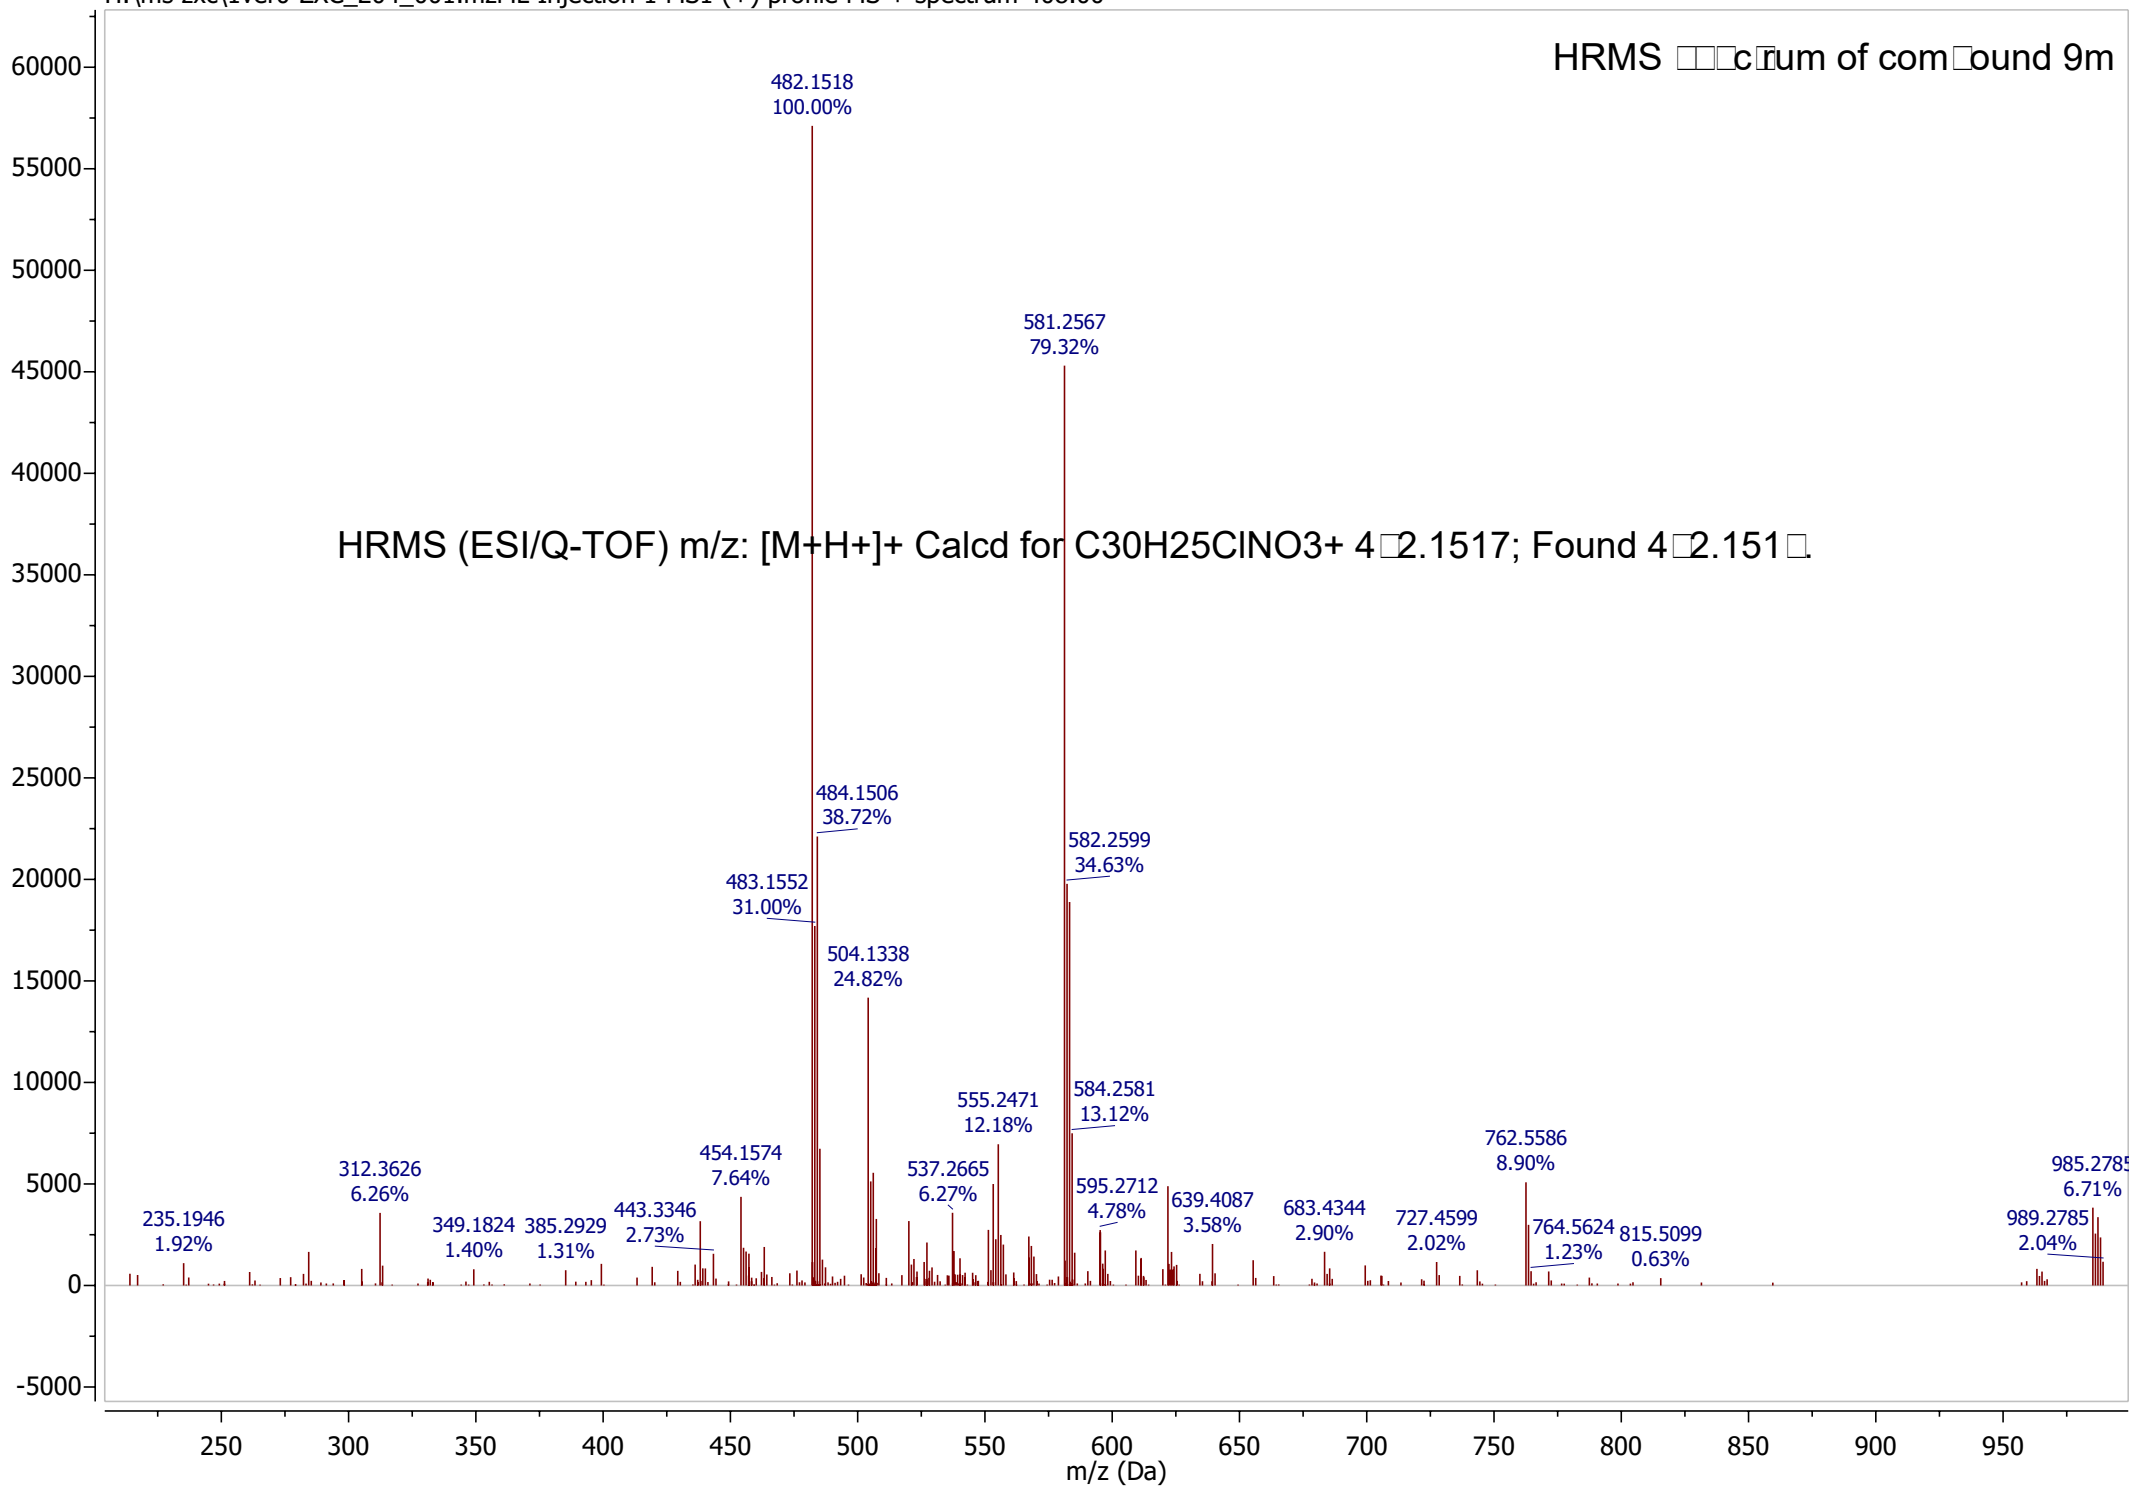

RMS (ESI/Q-TOF) m/z: [M+H]<sup>+</sup> Calcd for C<sub>27</sub>H<sub>27</sub>ClNO<sub>4</sub>S<sup>+</sup> 496.1344; Found 496.1344.

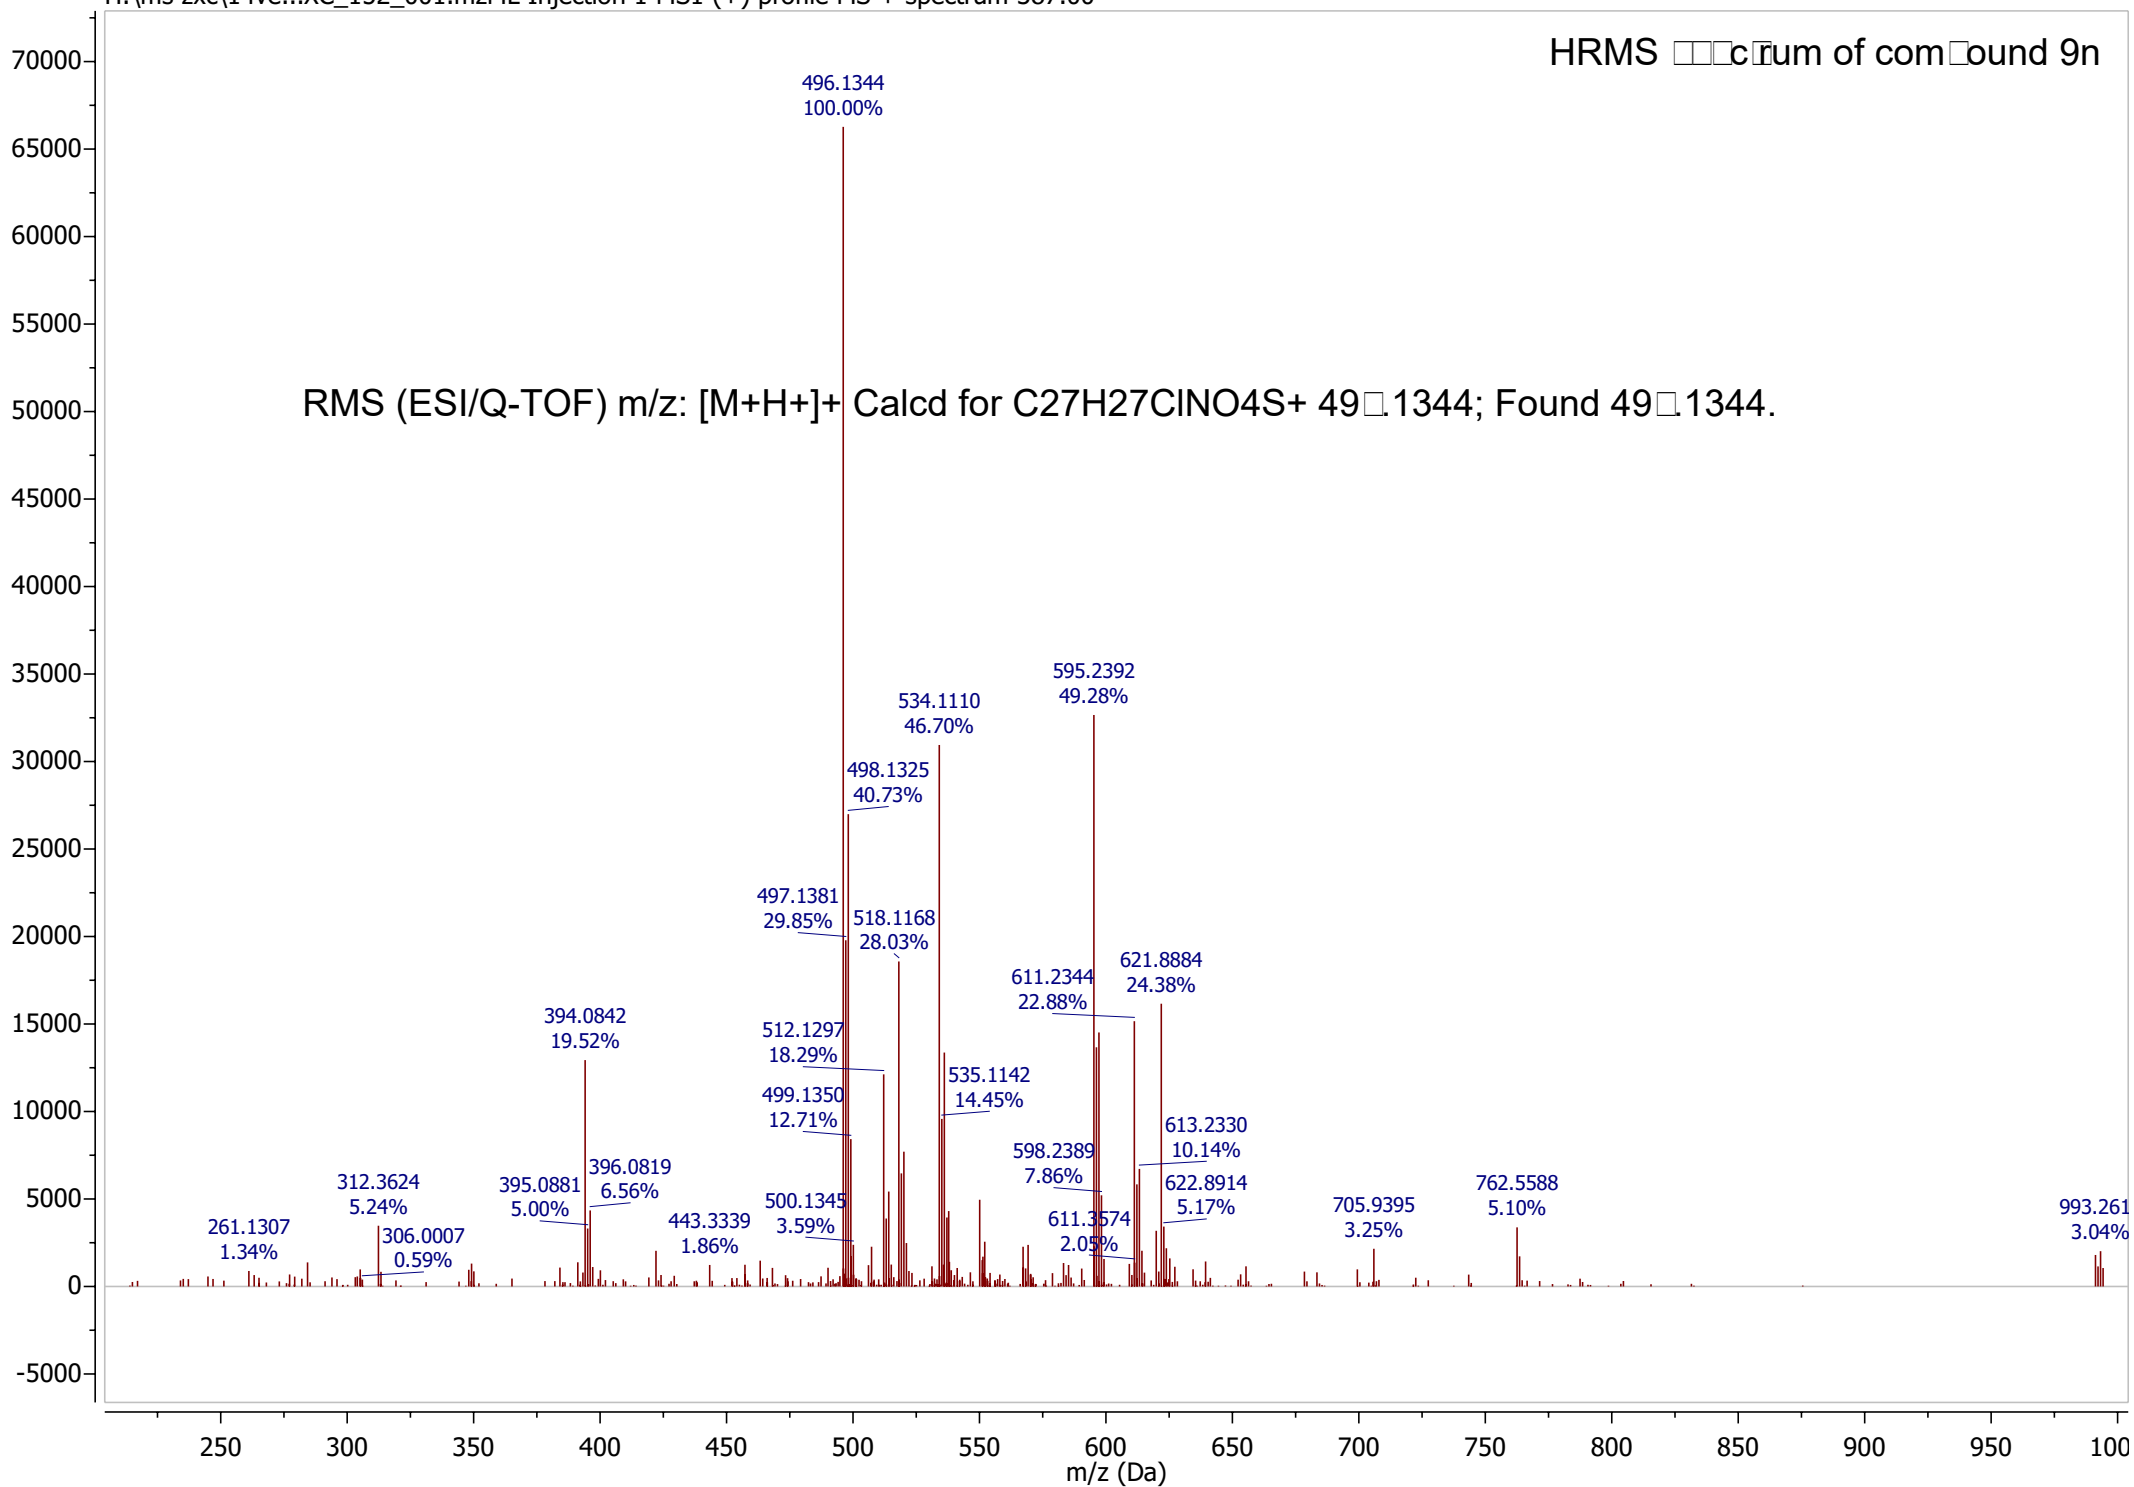

HRMS (ESI/Q-TOF) m/z: [M+Na]<sup>+</sup> Calcd for C<sub>25</sub>H<sub>22</sub>ClNO<sub>3</sub>Na<sup>+</sup> 442.1100; Found 442.1175.

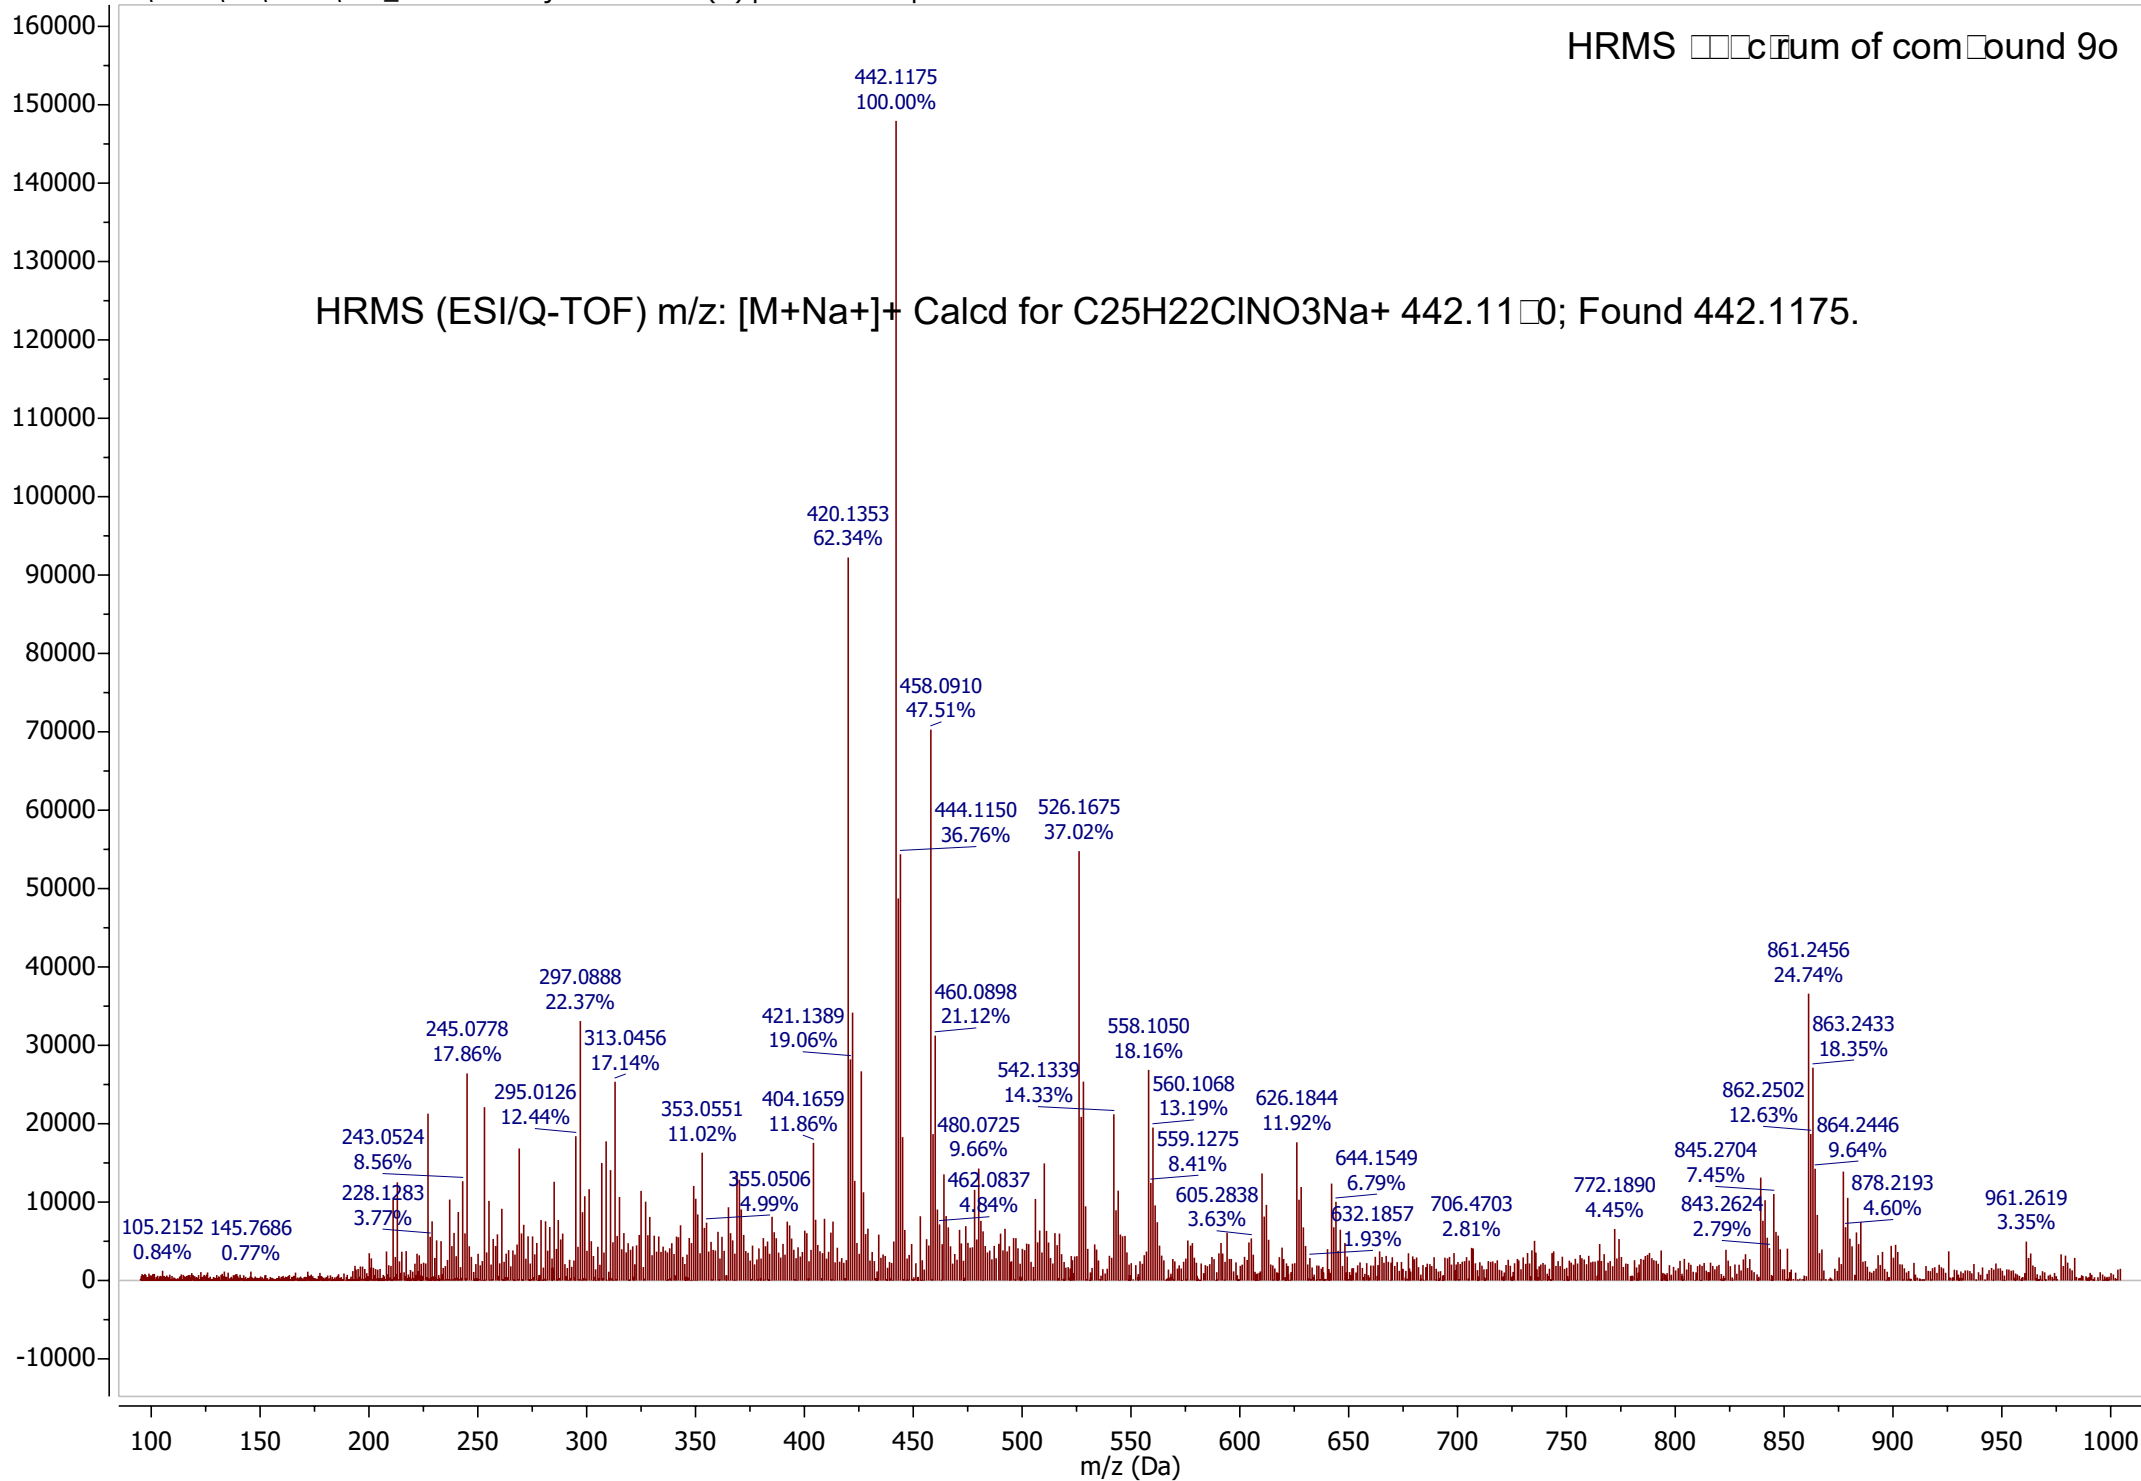

HRMS (ESI/Q-TOF) m/z: [M+H]<sup>+</sup> Calcd for C<sub>24</sub>H<sub>22</sub>ClN<sub>2</sub>O<sub>3</sub><sup>+</sup> 421.1313; Found 421.1315.

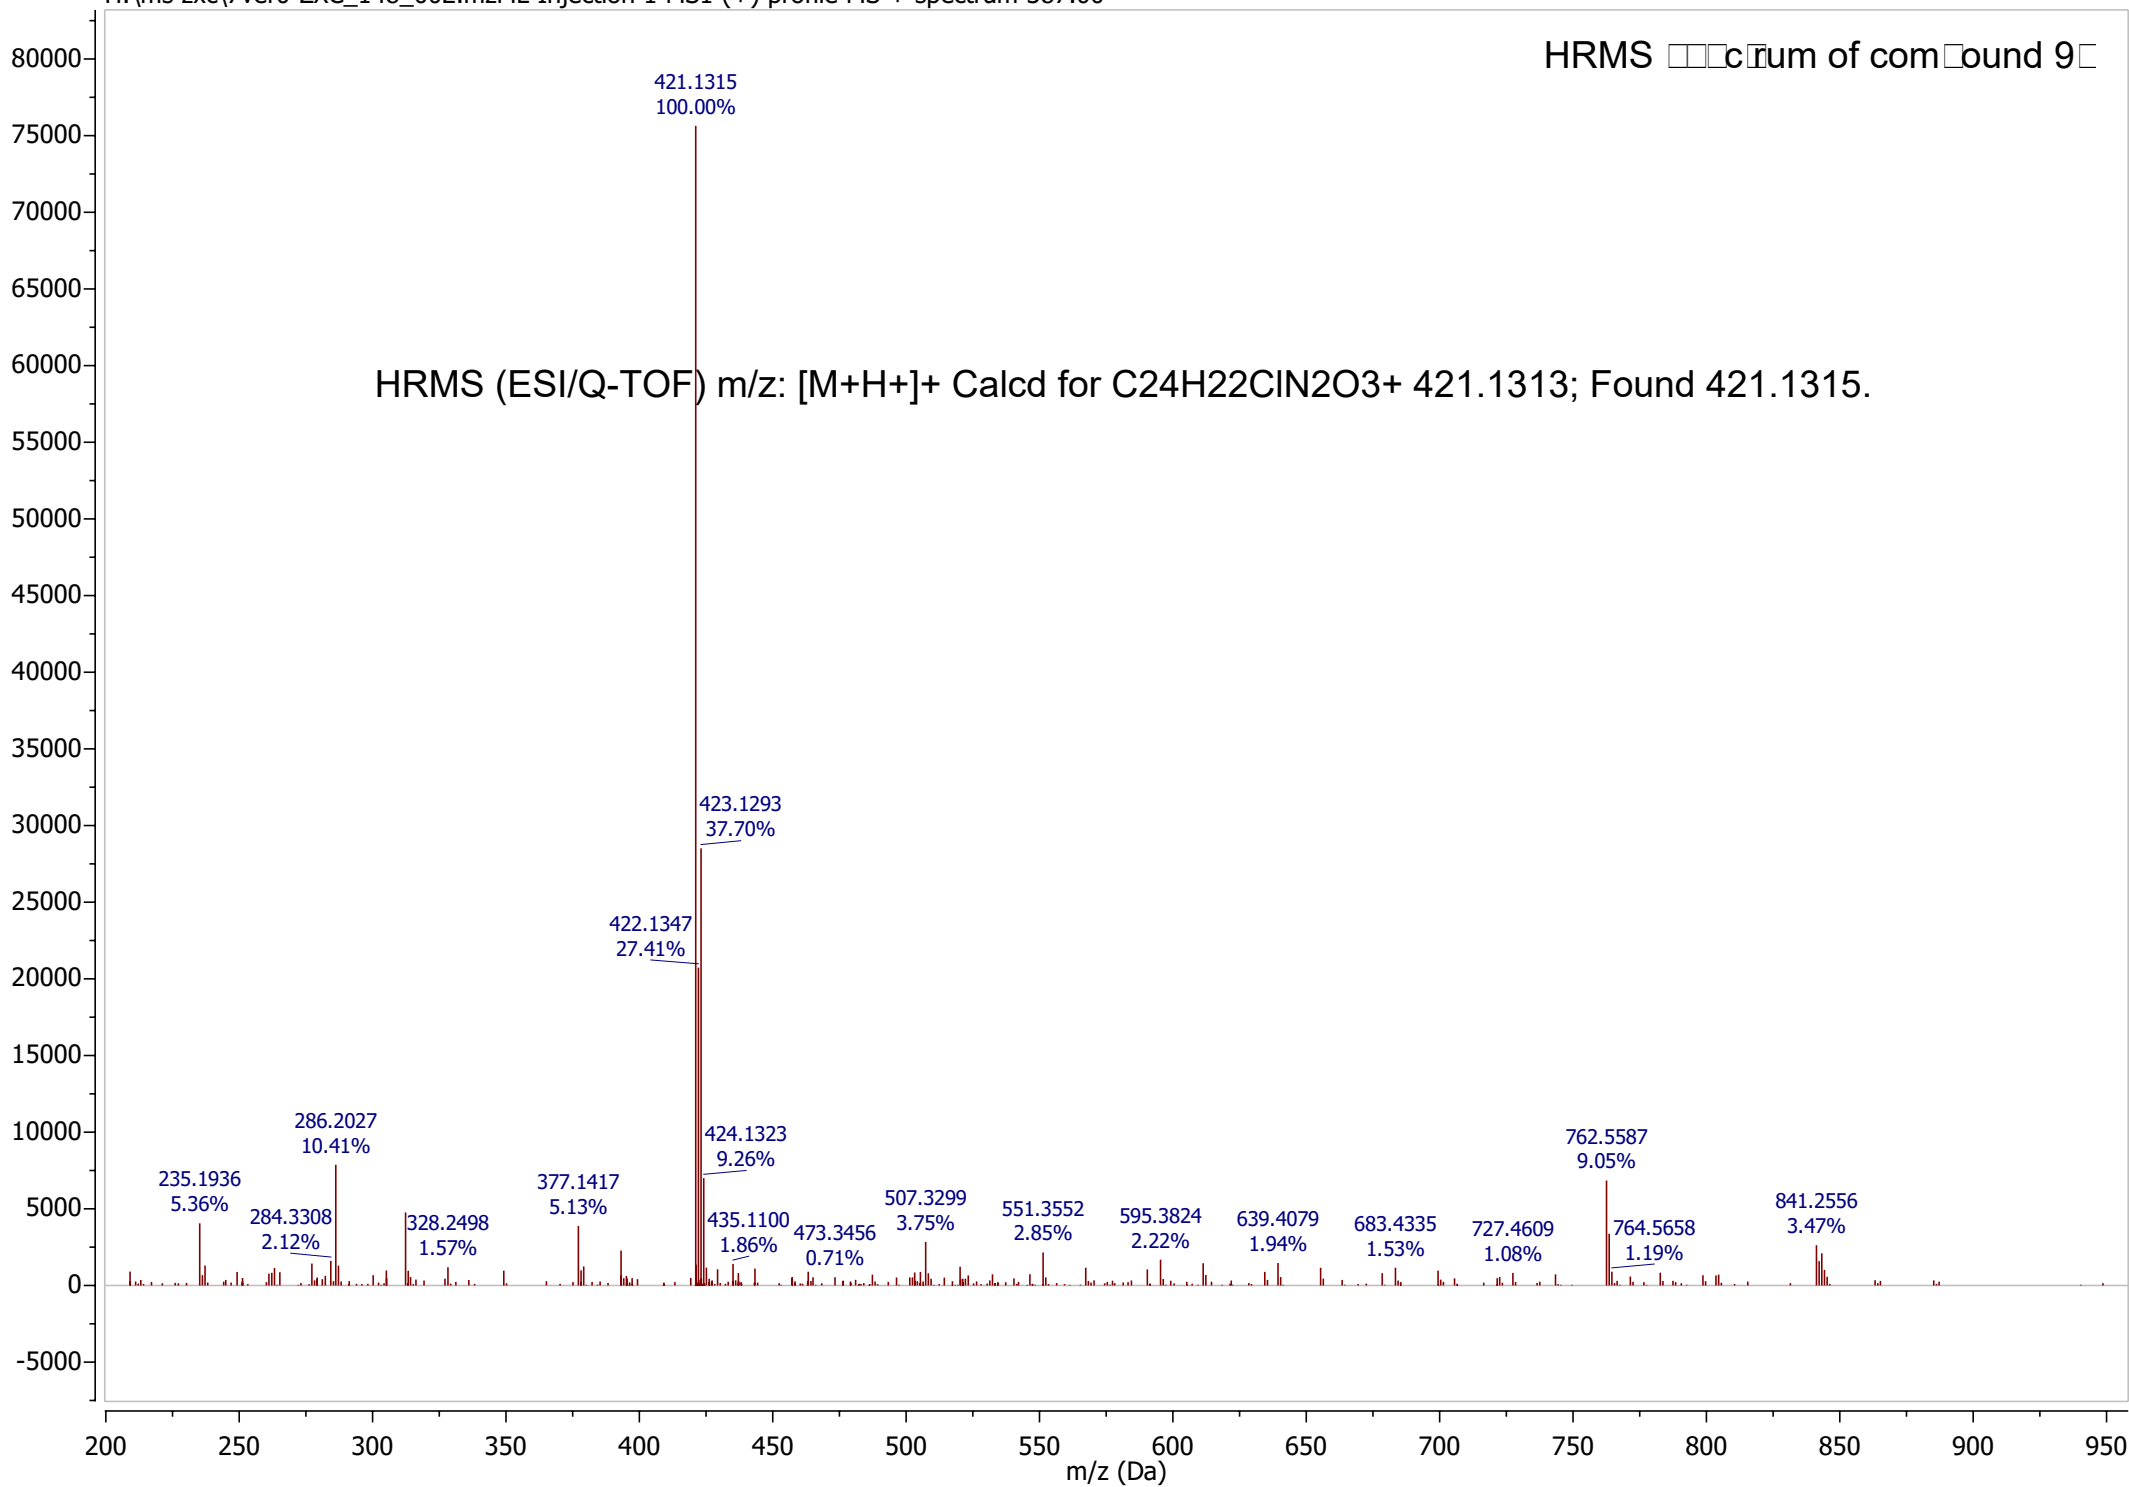

HRMS (ESI/Q-TOF) m/z: [M+H]<sup>+</sup> Calcd for C<sub>25</sub>H<sub>22</sub>ClFNO<sub>3</sub><sup>+</sup> 431.127; Found 431.1271.

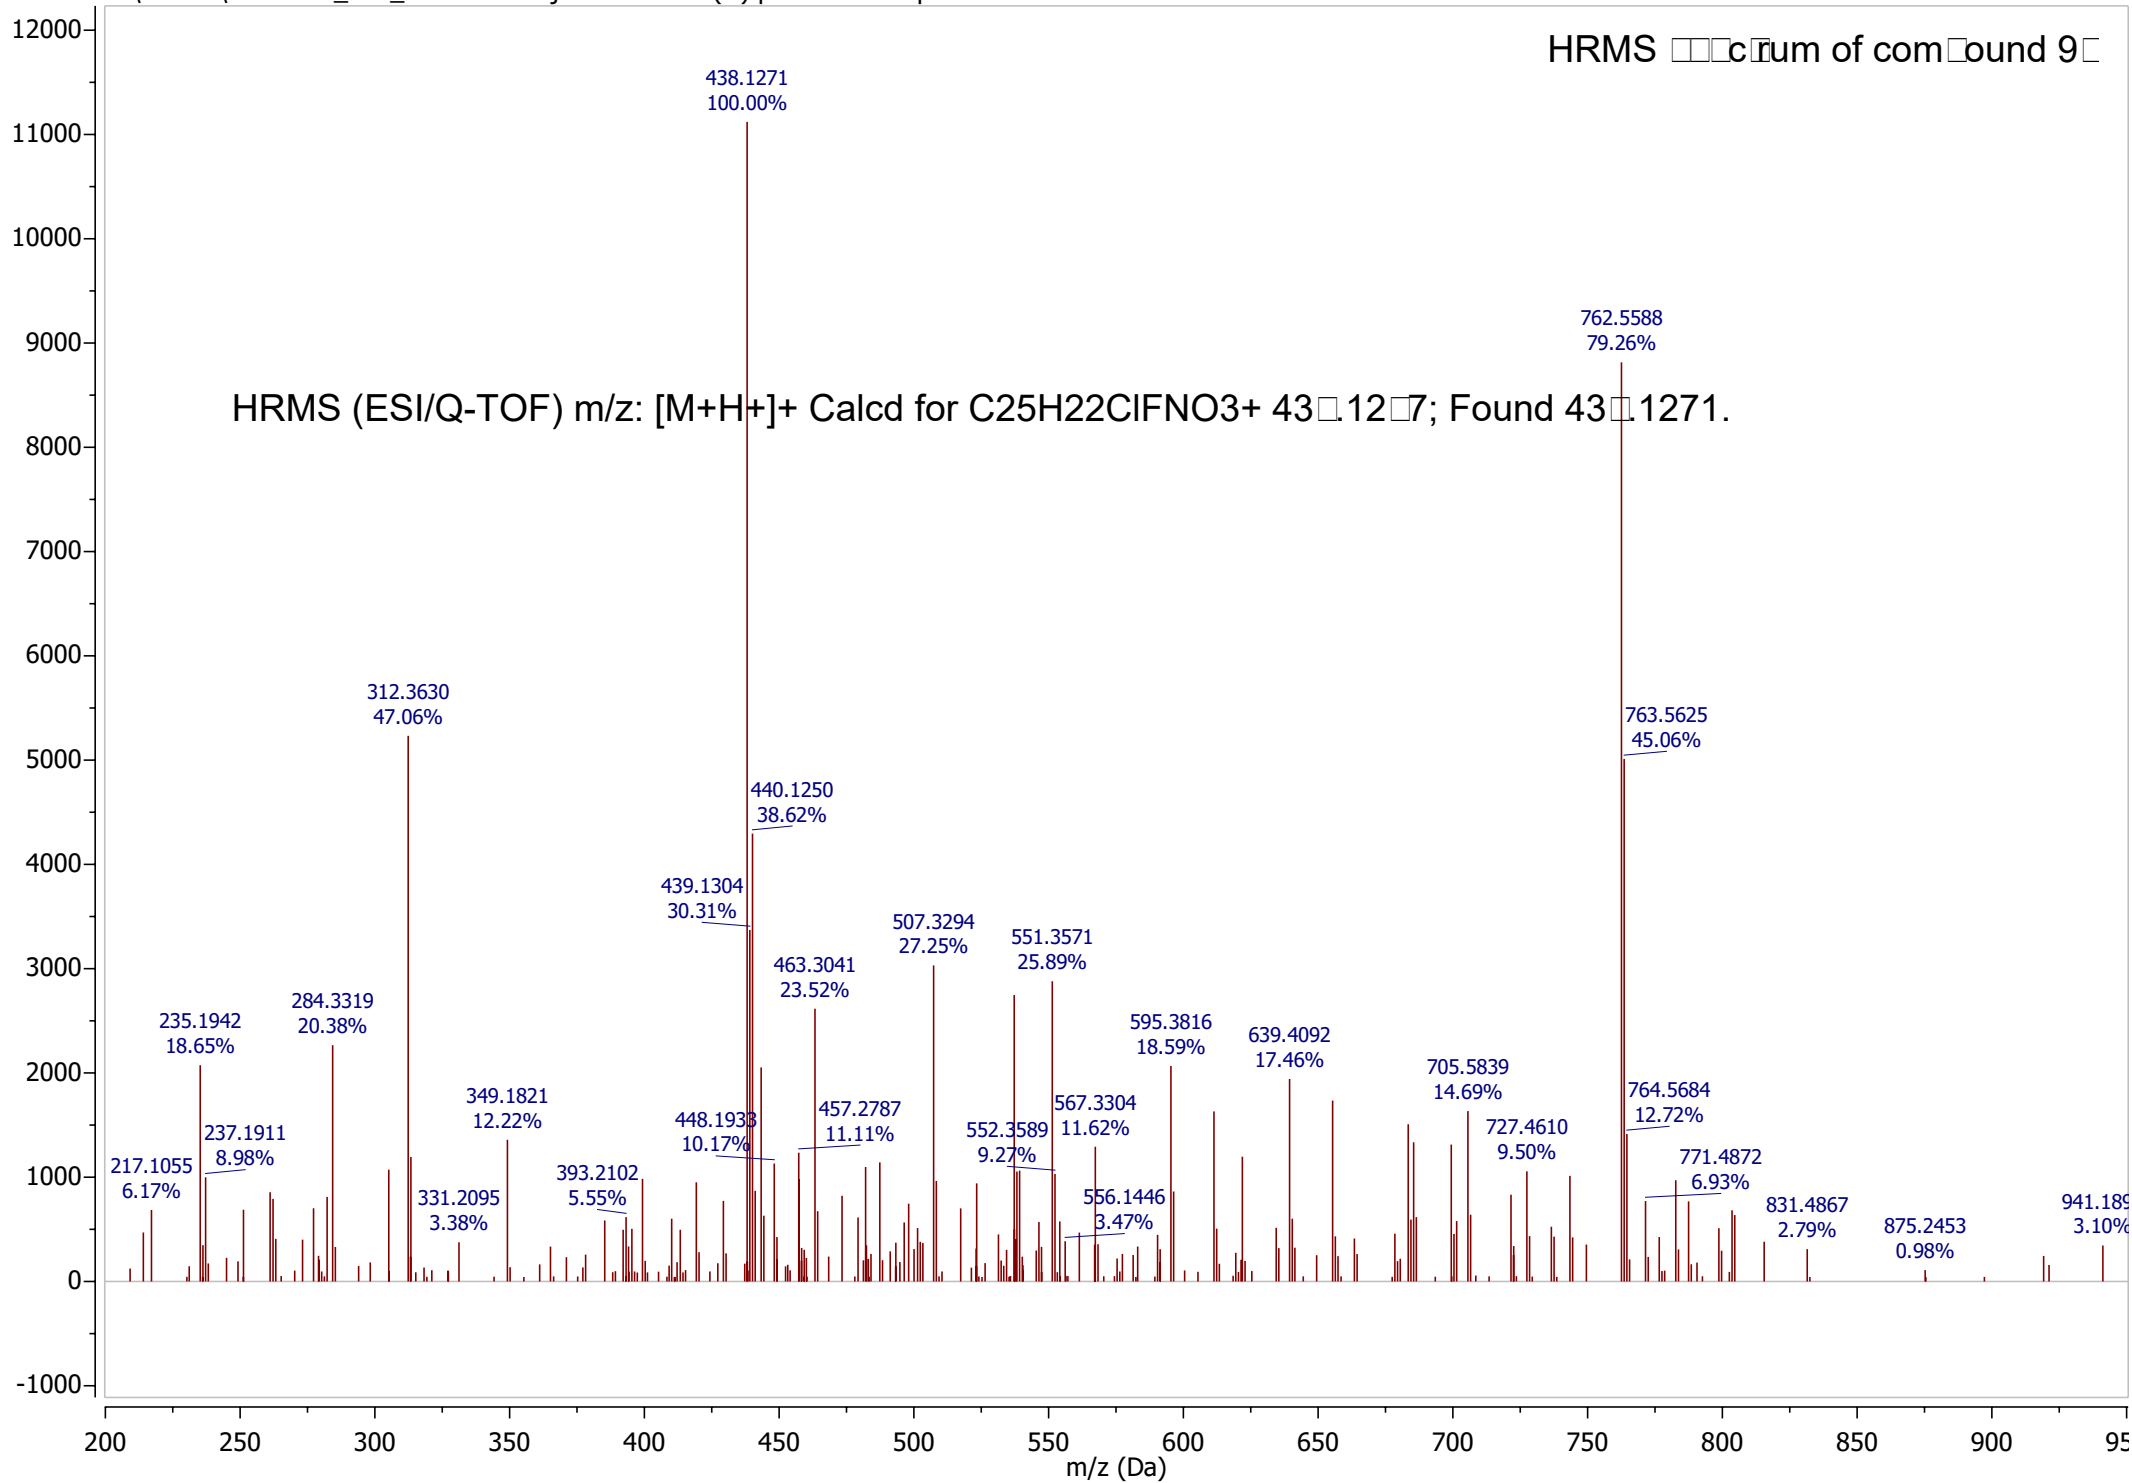

HRMS (ESI/Q-TOF) m/z: [M+H]<sup>+</sup> Calcd for C<sub>22</sub>H<sub>25</sub>FNO<sub>4</sub><sup>+</sup> 434.1702; Found 434.1700.

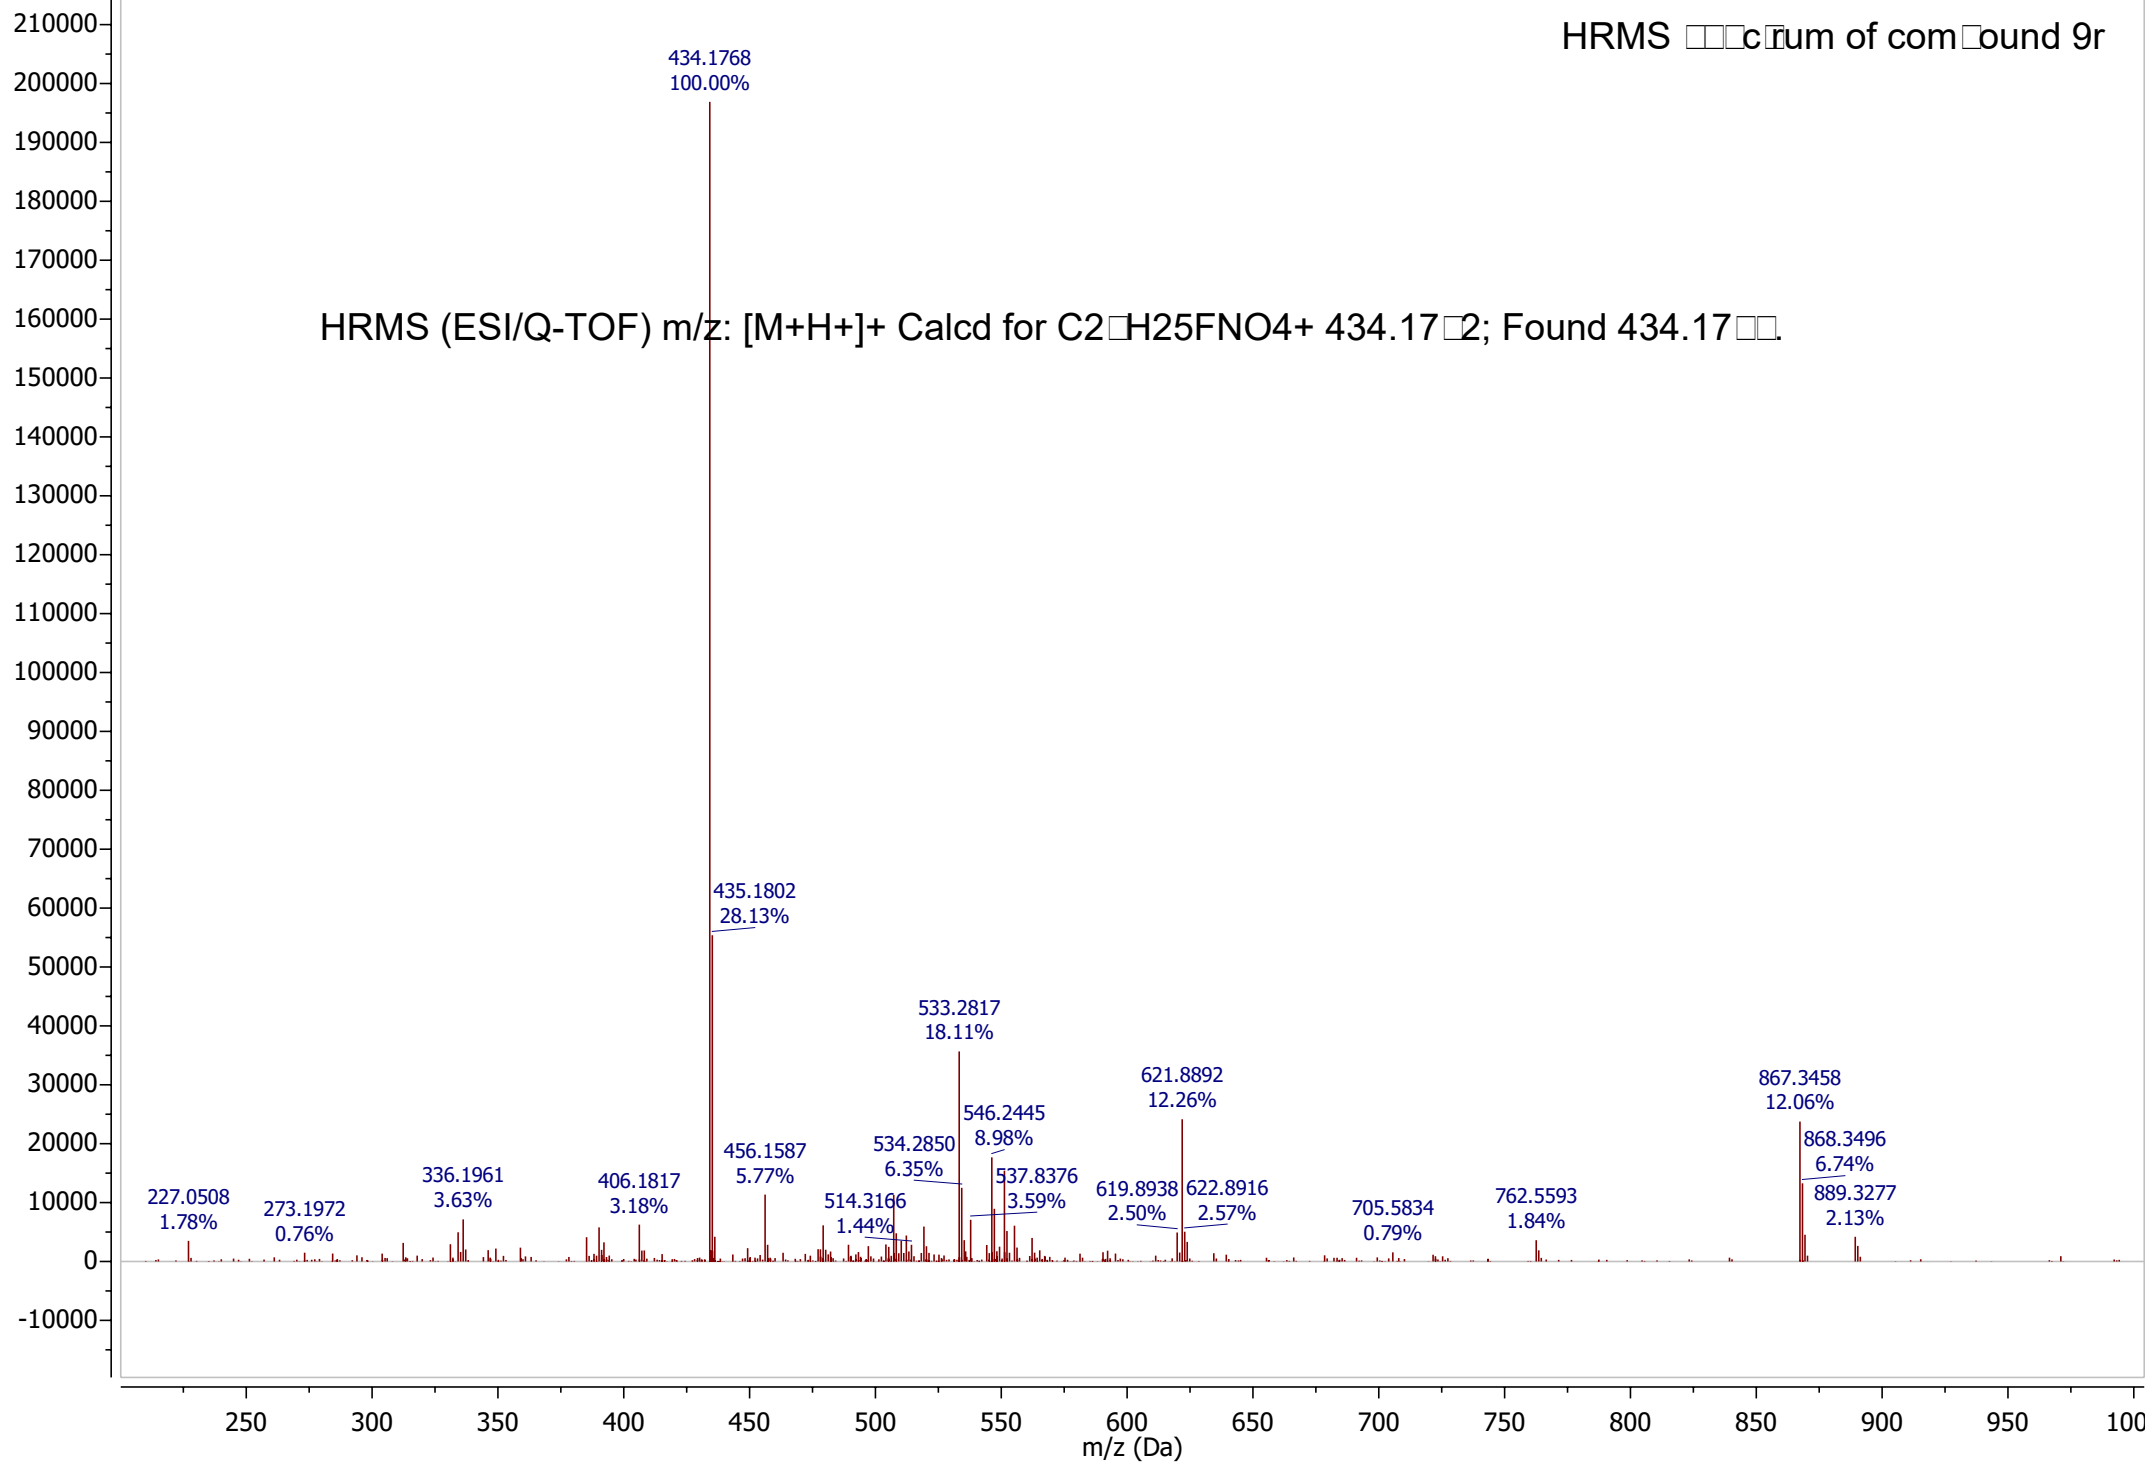



HRMS (ESI/Q-TOF) m/z: [M+H]<sup>+</sup> Calcd for C<sub>27</sub>H<sub>27</sub>FNO<sub>4</sub>+ 441.1919; Found 441.1924.

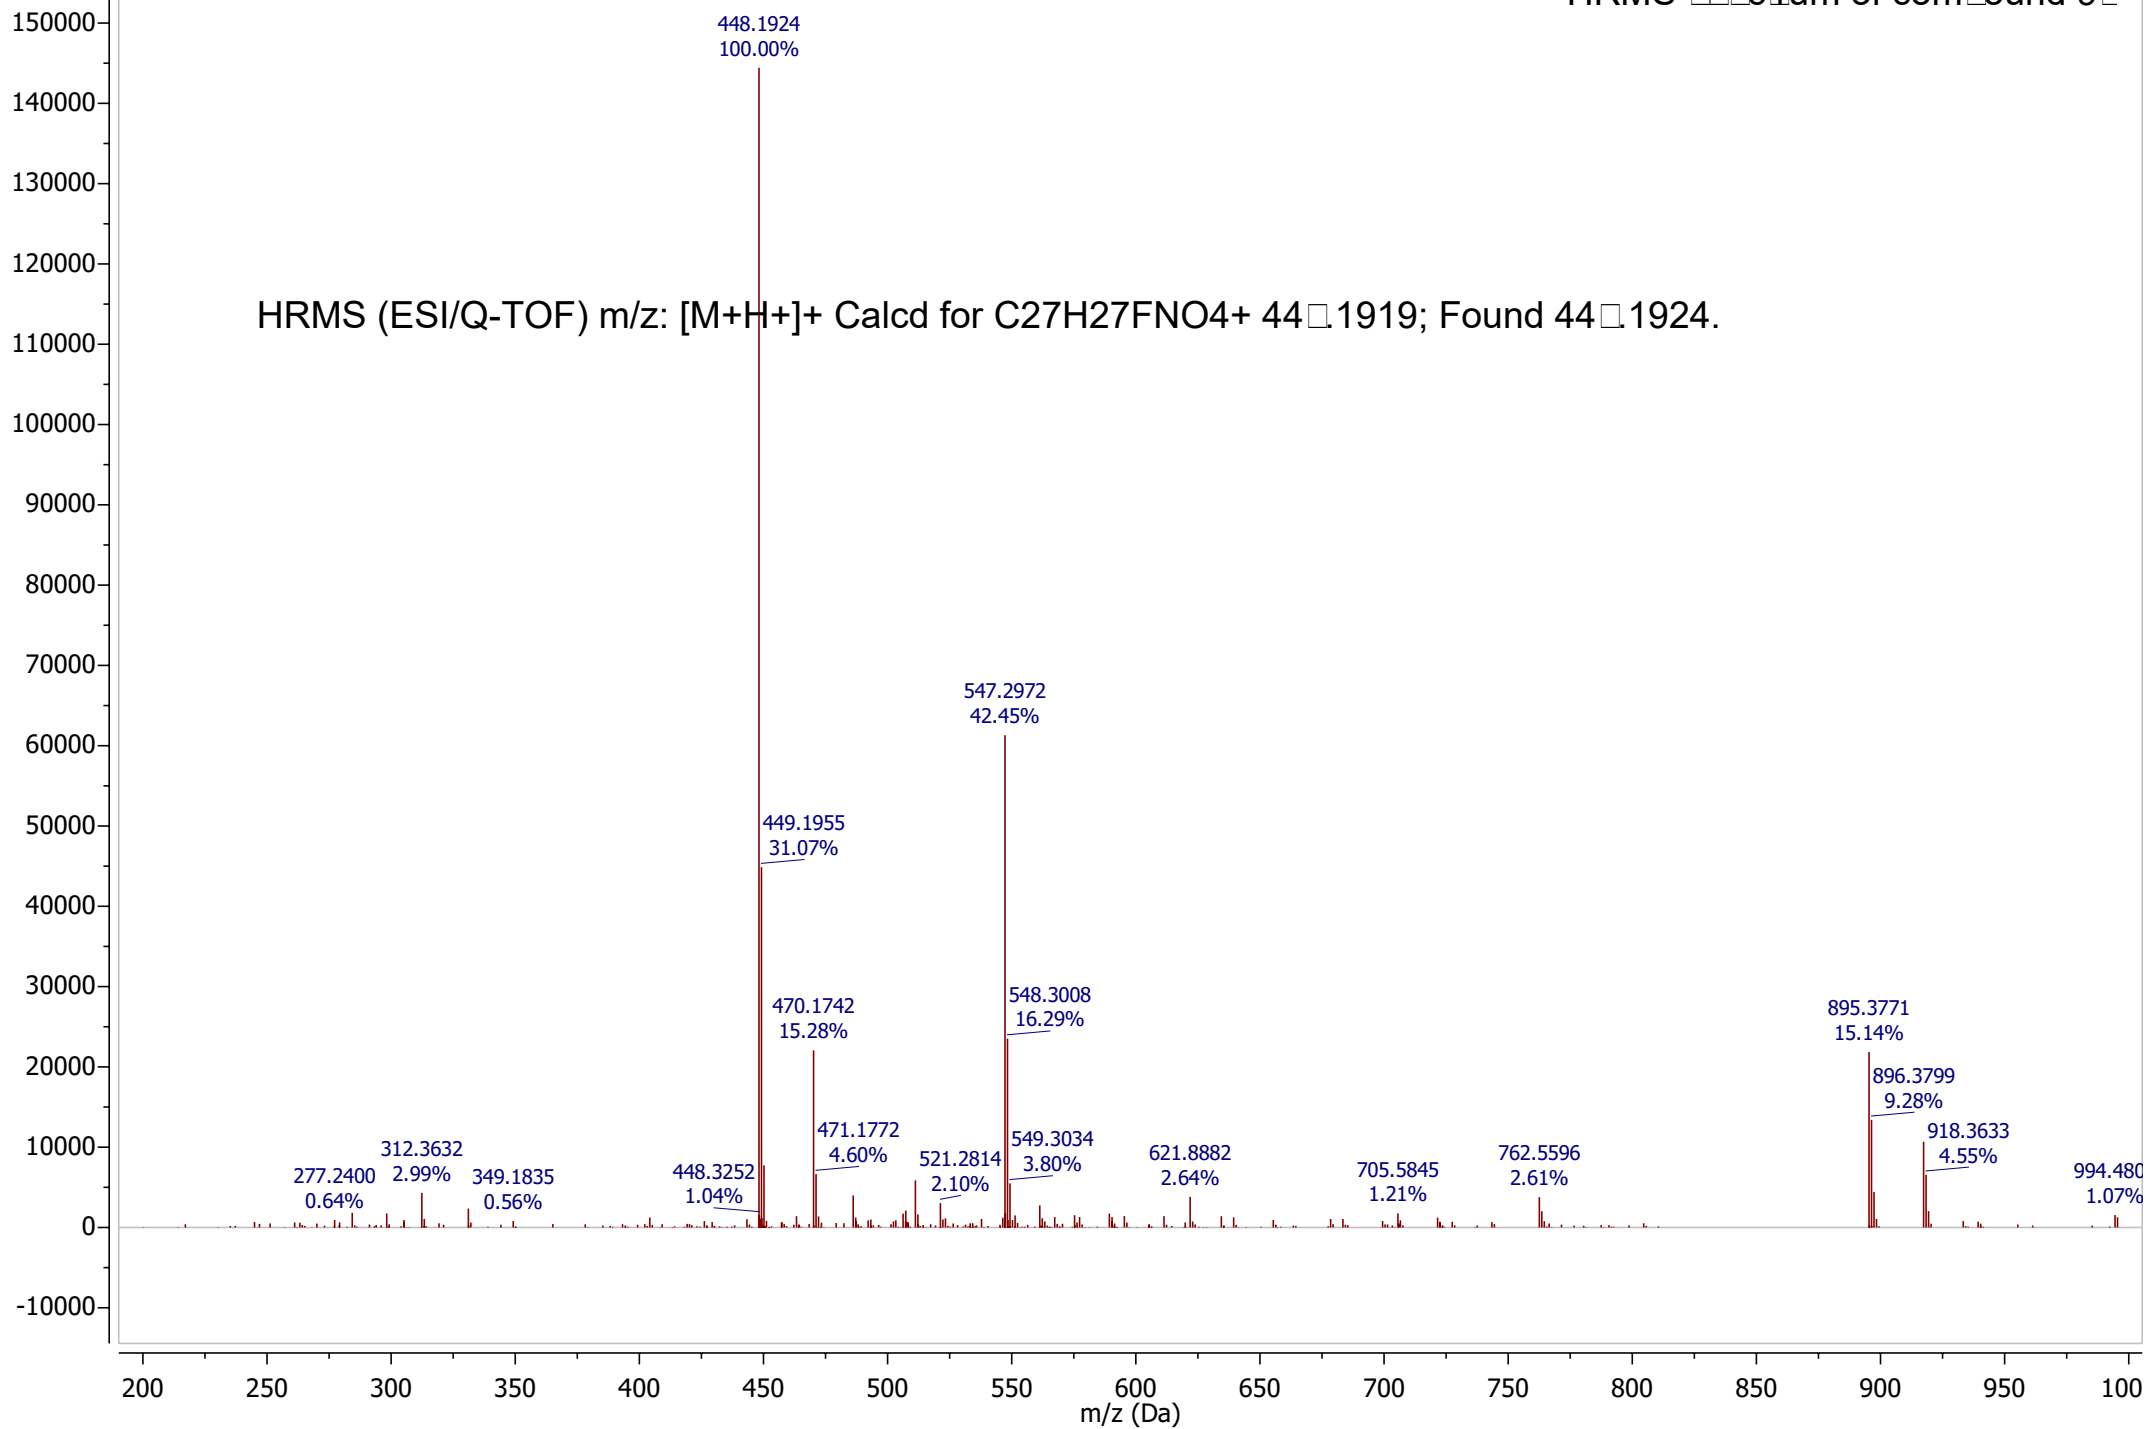

HRMS (ESI/Q-TOF) m/z: [M+H]<sup>+</sup> Calcd for C<sub>30</sub>H<sub>25</sub>FO<sub>4</sub>+ 421.172; Found 421.173.

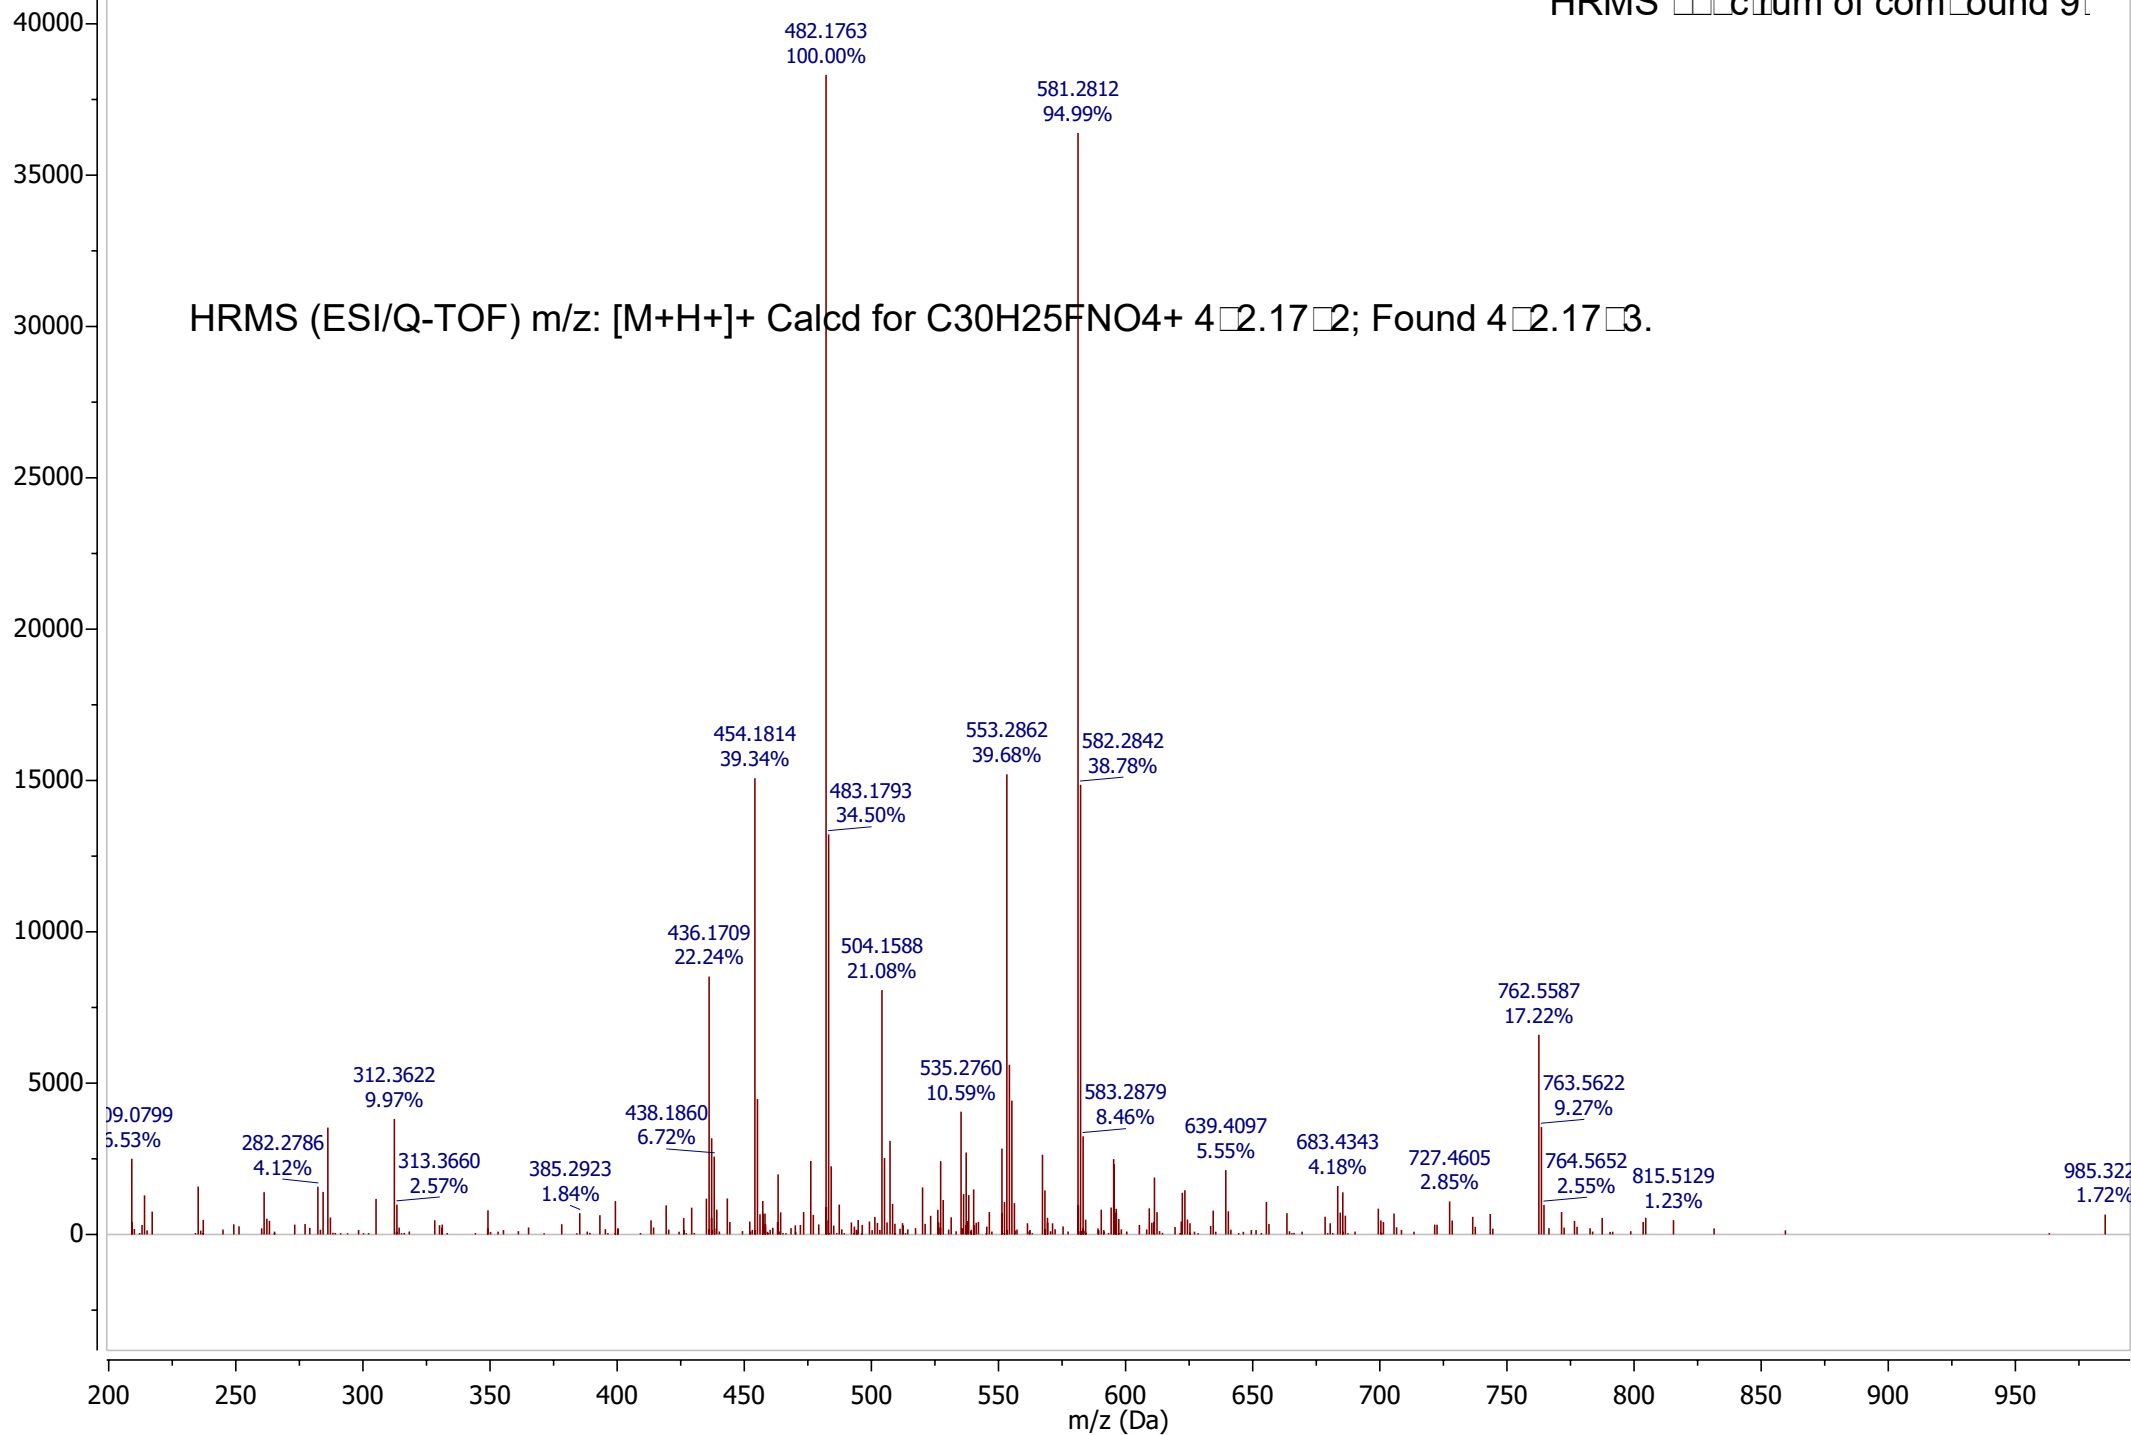

HRMS (ESI/Q-TOF) m/z: [M+Na]<sup>+</sup> Calcd for C<sub>25</sub>H<sub>22</sub>FNO<sub>3</sub>Na<sup>+</sup> 426.147; Found 426.149.

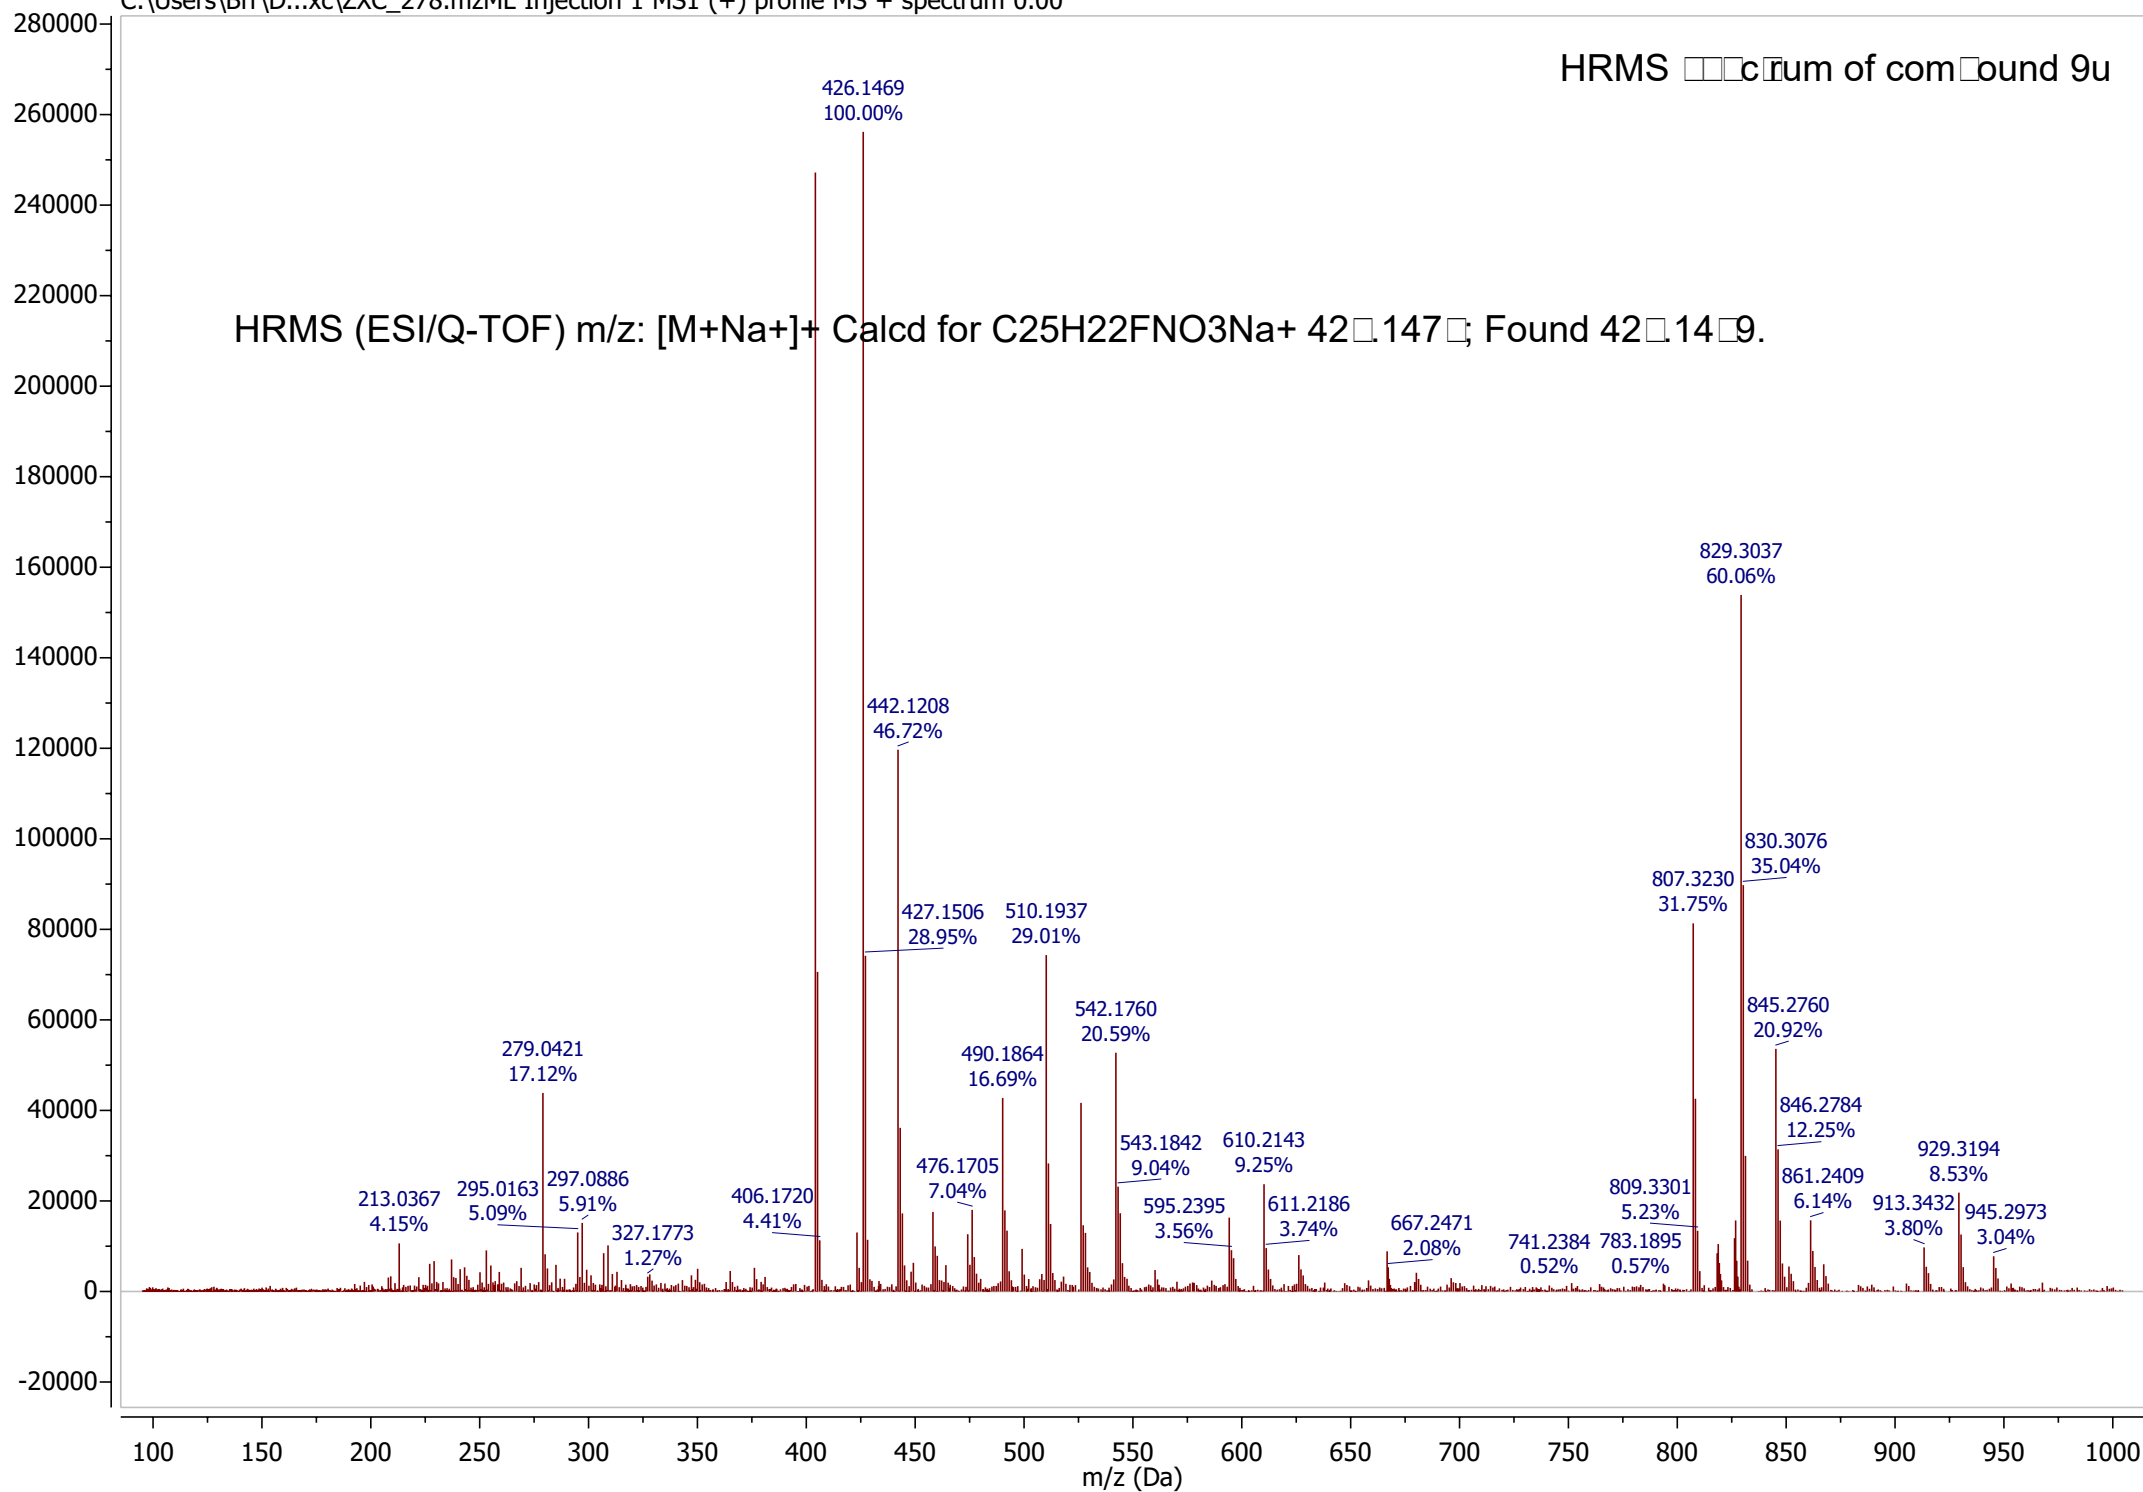

17ver0-ZXC\_187\_002 [385] ◆

HRMS Spectrum of compound 10a

17ver0-ZXC\_187\_002 [385] ◆

HRMS (ESI/Q-TOF) m/z: [M+Na]<sup>+</sup> Calcd for C<sub>15</sub>H<sub>11</sub>ClO<sub>4</sub>Na<sup>+</sup> 313.0234; Found 313.0234.

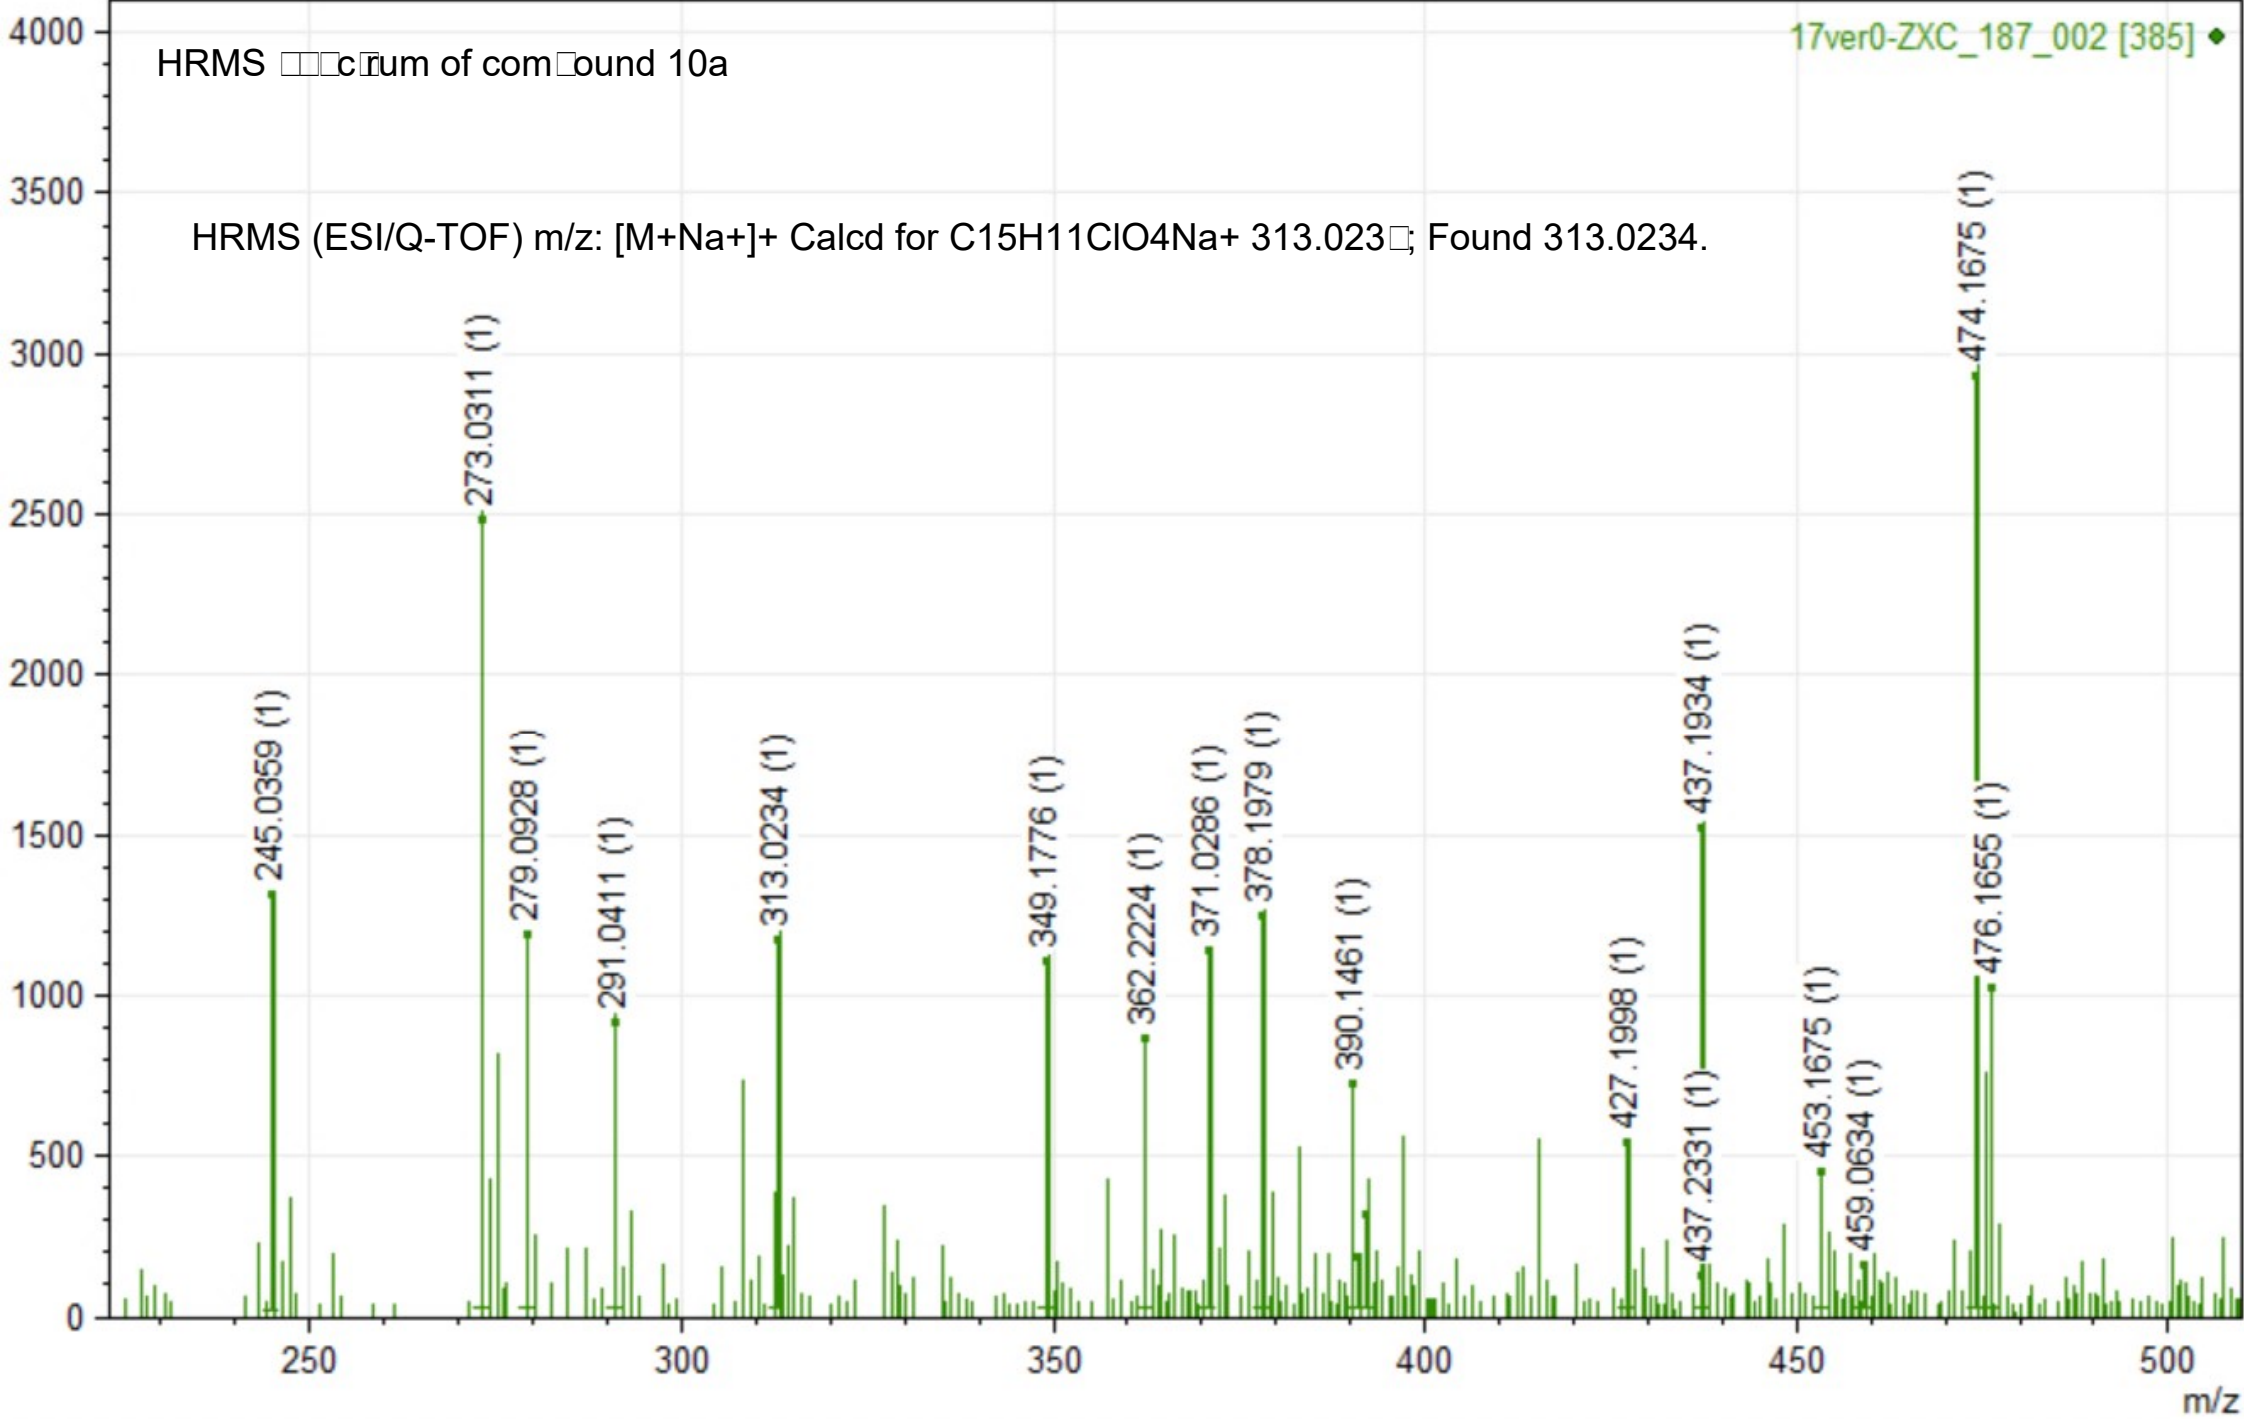

HRMS (ESI/Q-TOF) m/z: [M+Na]<sup>+</sup> Calcd for C<sub>15</sub>H<sub>12</sub>O<sub>4</sub>Na<sup>+</sup> 279.0623; Found 279.0623.

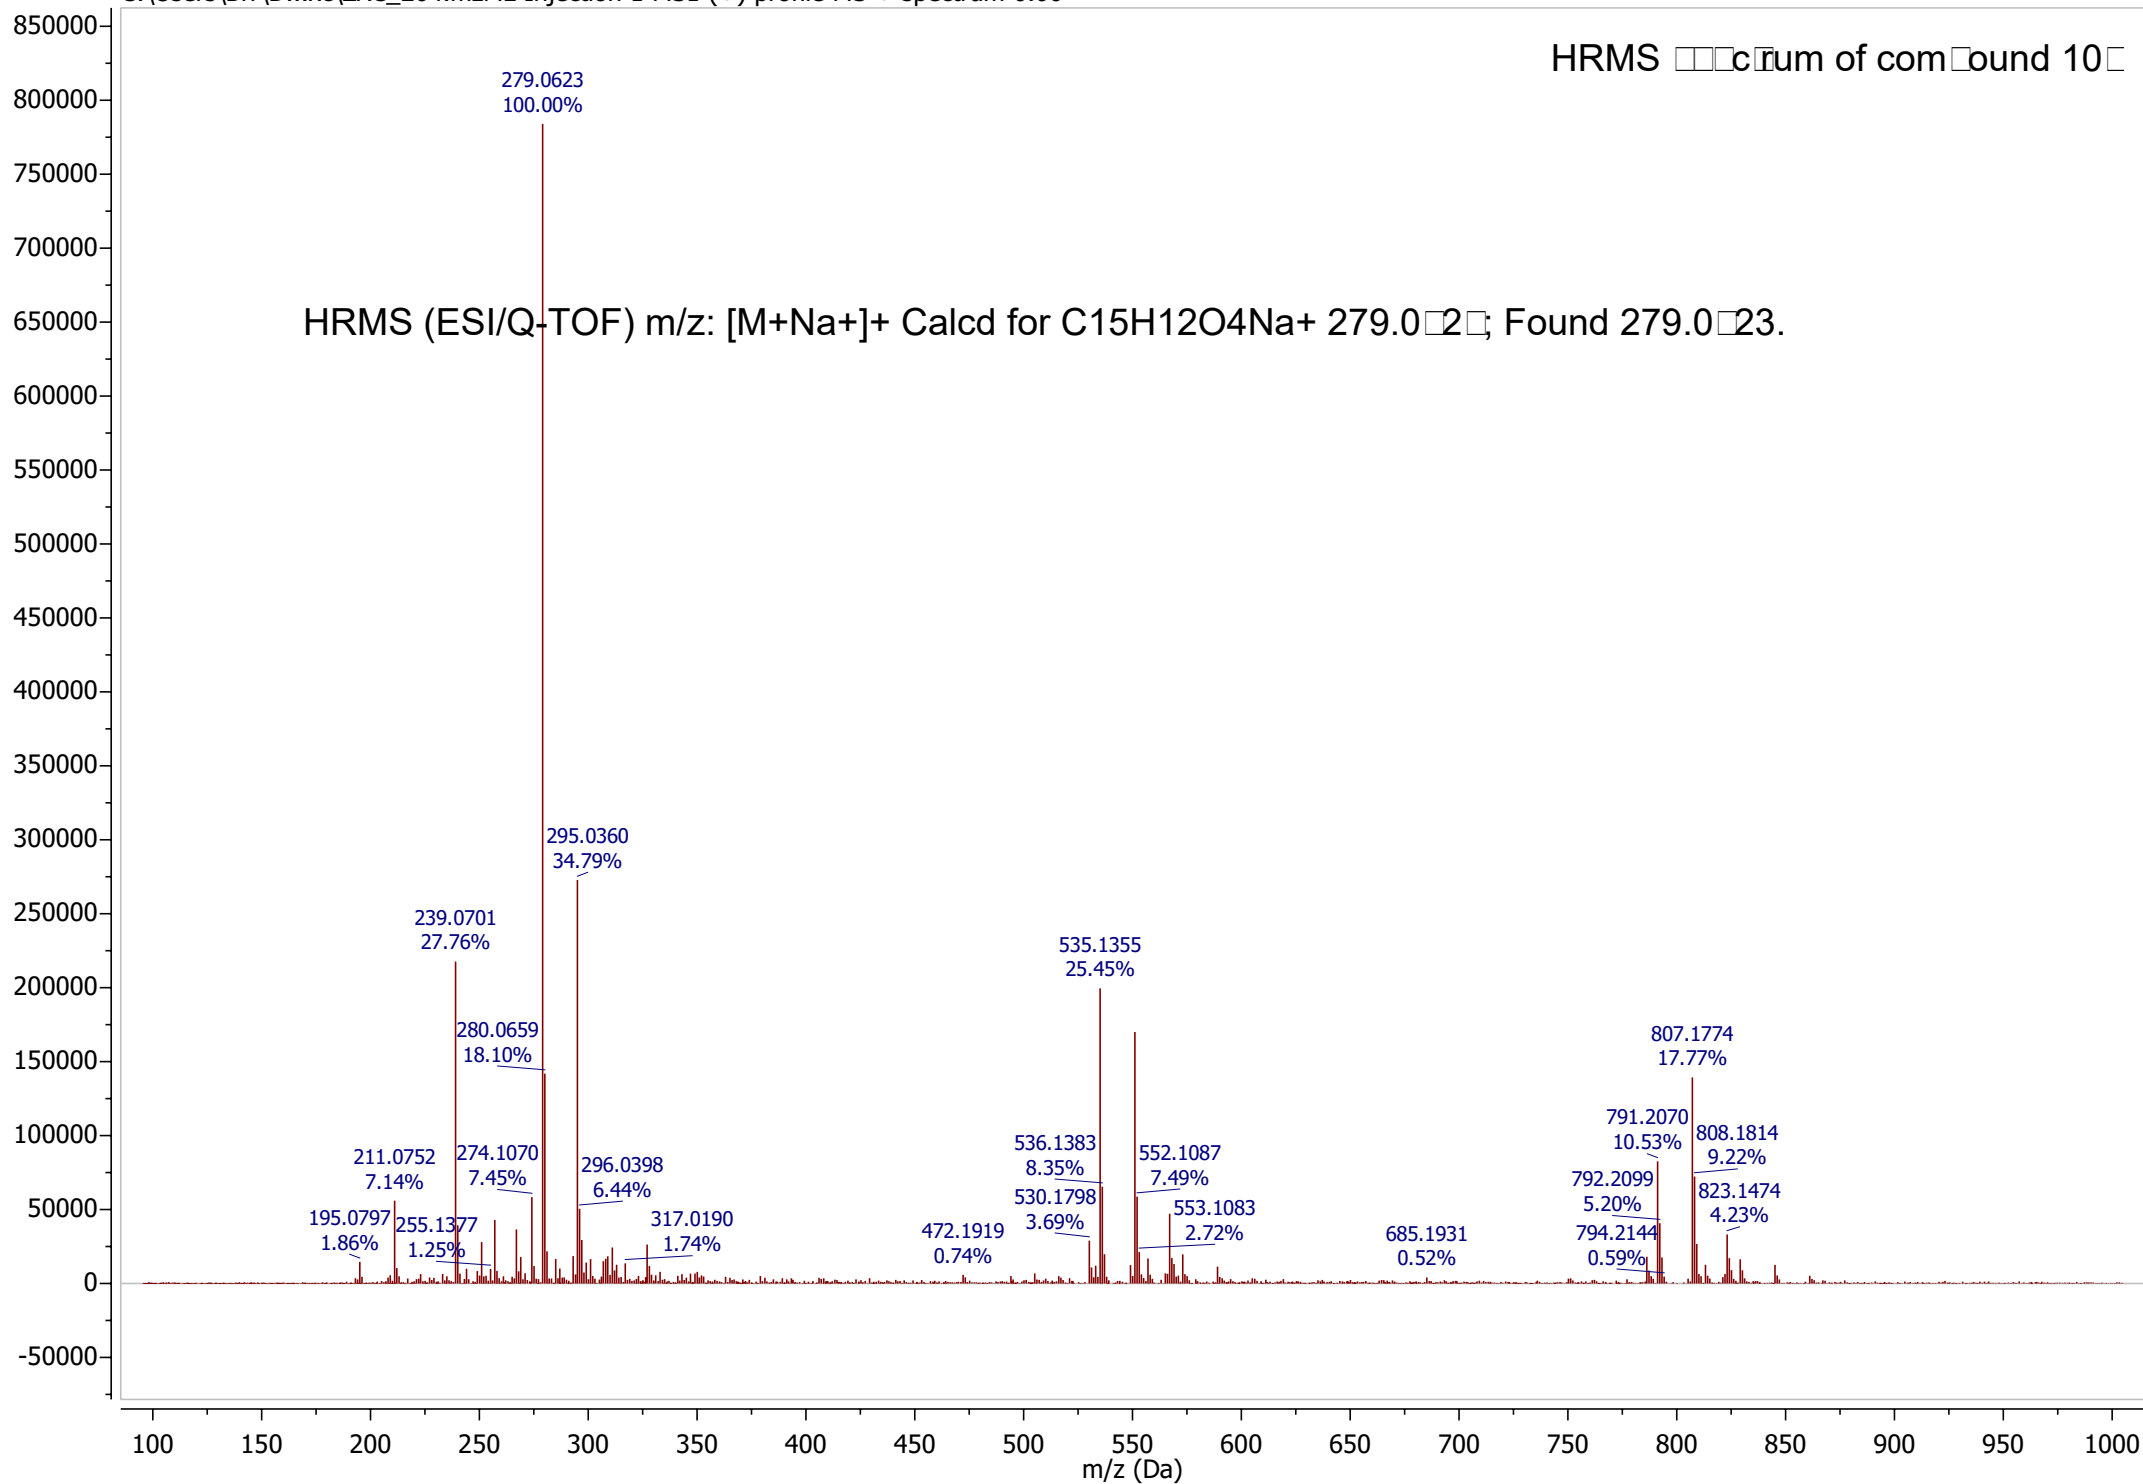

HRMS (ESI/Q-TOF) m/z: [M-H]<sup>-</sup> Calcd for C<sub>16</sub>H<sub>13</sub>O<sub>5</sub>- 255.0719; Found 255.0711.

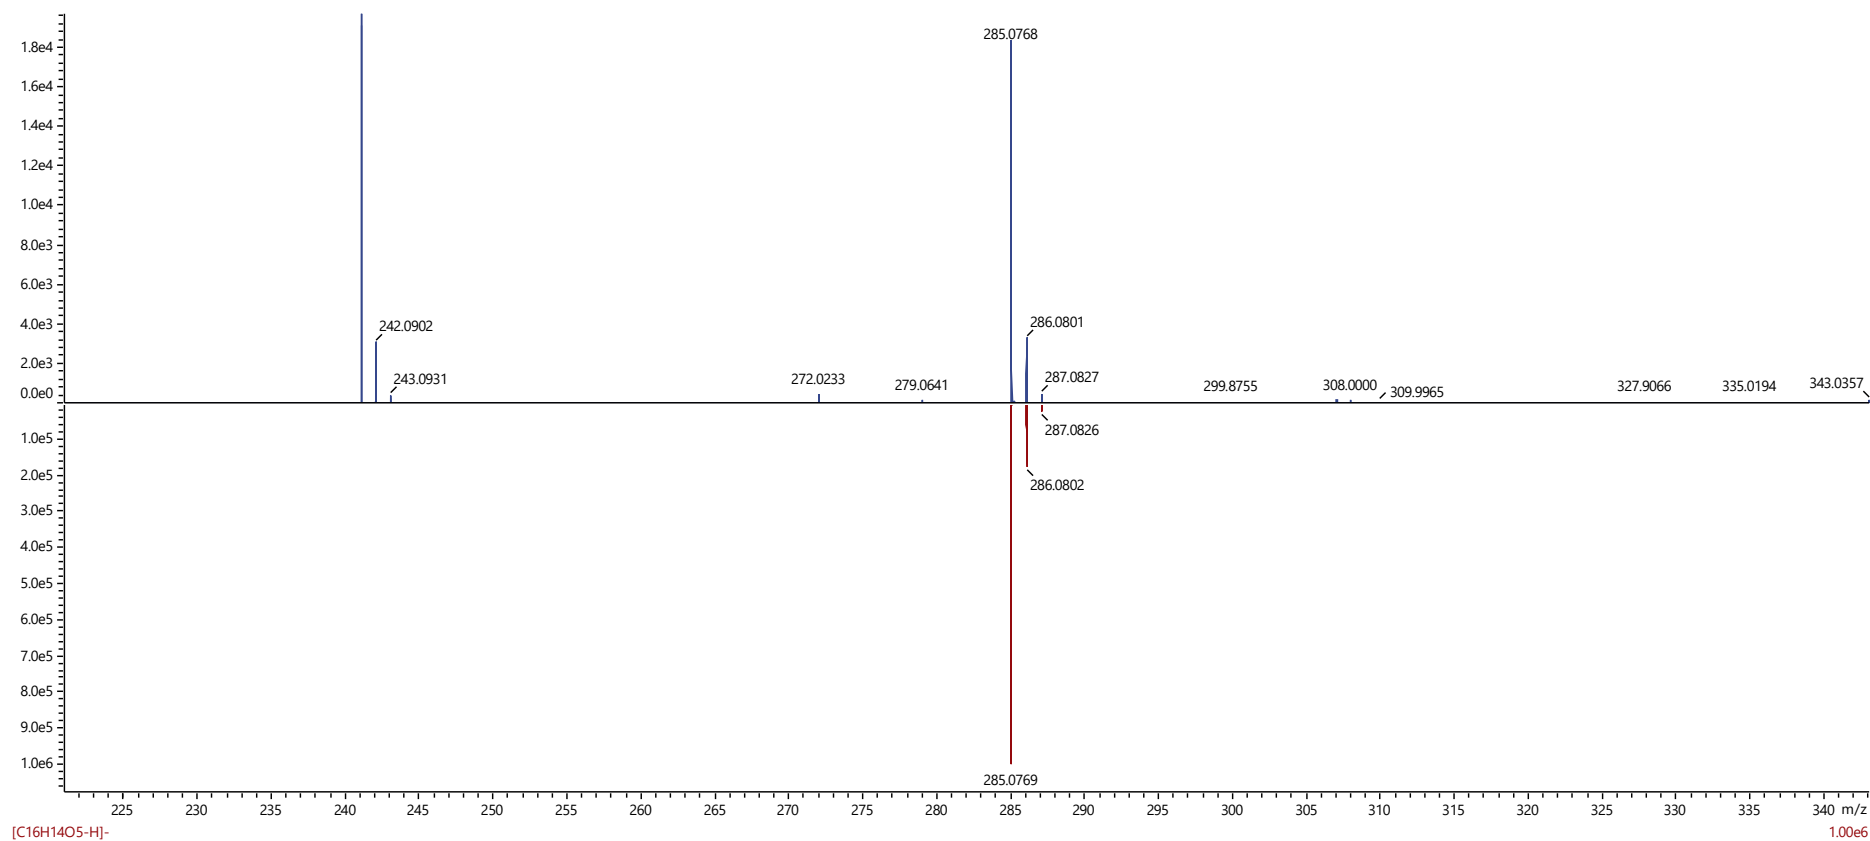

HRMS (ESI/Q-TOF) m/z: [M+Na]<sup>+</sup> Calcd for C<sub>14</sub>H<sub>14</sub>O<sub>4</sub>Na<sup>+</sup> 293.074; Found 293.075.

| m/z      | Relative Intensity (%) |
|----------|------------------------|
| 225.0913 | 27.09%                 |
| 253.0861 | 100.00%                |
| 271.0967 | 30.38%                 |
| 293.0785 | 38.81%                 |
| 309.0528 | 14.33%                 |
| 315.0611 | 6.74%                  |
| 349.1770 | 17.23%                 |
| 370.2014 | 29.28%                 |
| 371.2054 | 7.48%                  |
| 377.2080 | 2.21%                  |
| 440.1775 | 19.62%                 |
| 454.2223 | 11.44%                 |
| 441.1813 | 6.20%                  |
| 512.2609 | 1.58%                  |
| 514.3166 | 23.94%                 |
| 515.3197 | 8.44%                  |
| 559.2151 | 3.58%                  |
| 563.1682 | 13.25%                 |
| 585.1495 | 5.12%                  |
| 634.4544 | 1.40%                  |
| 705.5810 | 1.17%                  |
| 762.5590 | 12.97%                 |
| 763.5618 | 6.78%                  |
| 776.5731 | 0.67%                  |
| 790.5893 | 1.34%                  |
| 828.3012 | 4.36%                  |

HRMS (ESI/Q-TOF) m/z: [M+Na<sup>+</sup>]<sup>+</sup> Calcd for C<sub>15</sub>H<sub>11</sub>FO<sub>4</sub>Na<sup>+</sup> 297.0534; Found 297.052

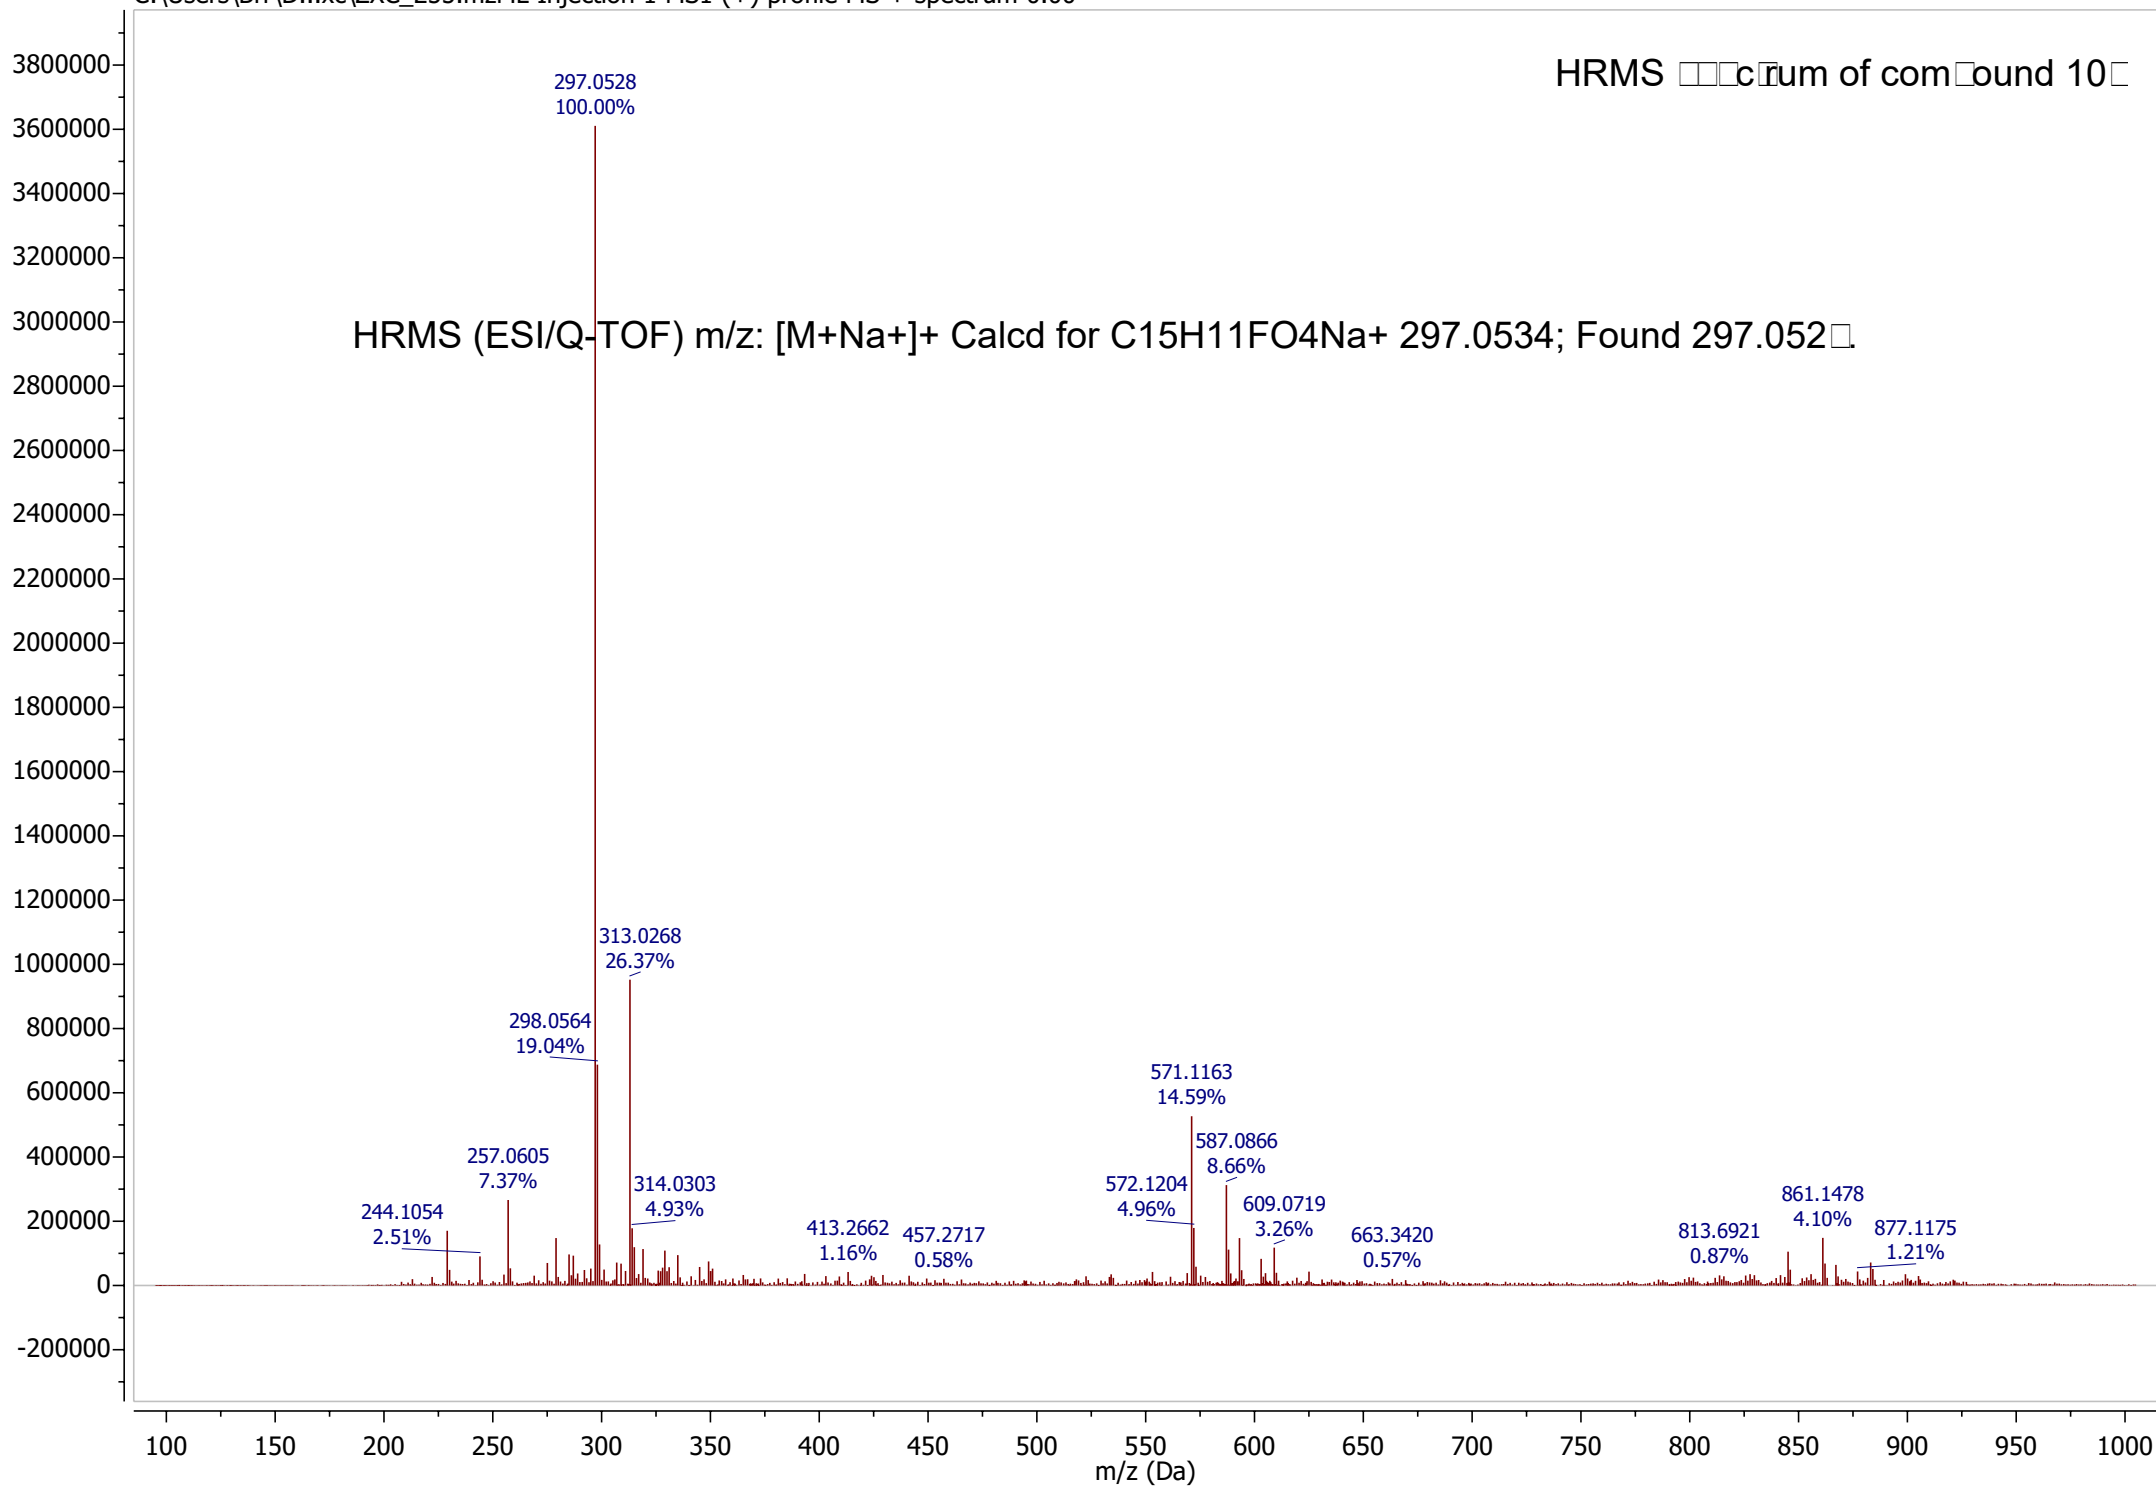



HRMS (ESI/Q-TOF) m/z: [M+Na]<sup>+</sup> Calcd for C<sub>15</sub>H<sub>10</sub>Cl<sub>2</sub>O<sub>4</sub>Na<sup>+</sup> 341.944, Found 341.941.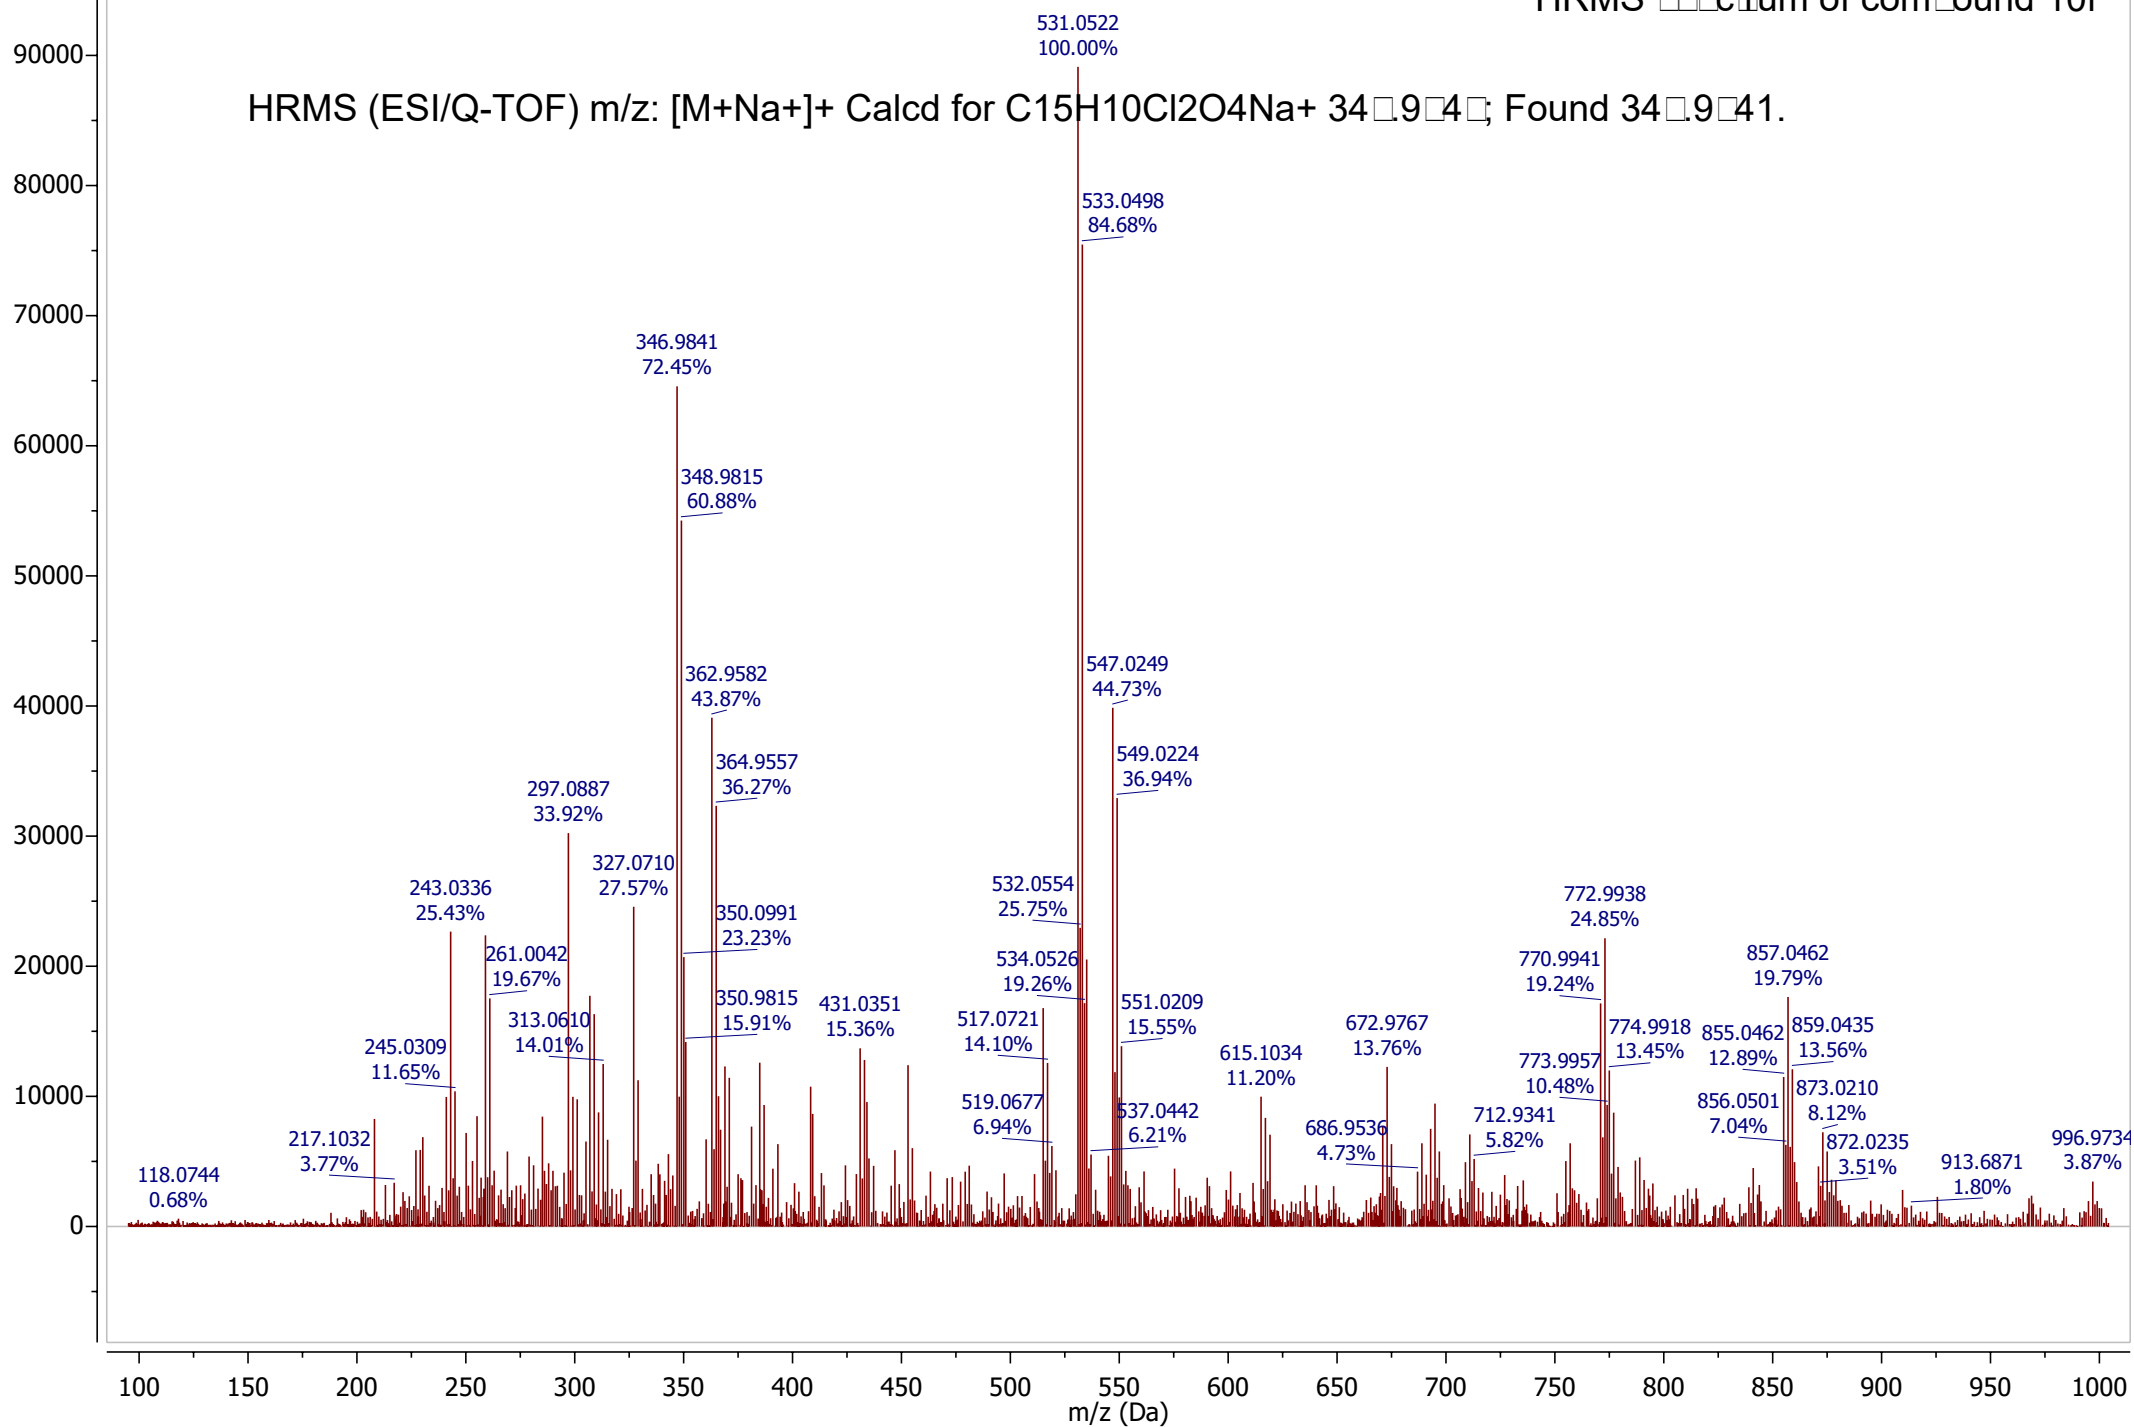

HRMS (ESI/Q-TOF) m/z: [M+H]<sup>+</sup> Calcd for C<sub>17</sub>H<sub>14</sub>N<sub>3</sub>O<sub>4</sub><sup>+</sup> 324.0979; Found 324.0974.

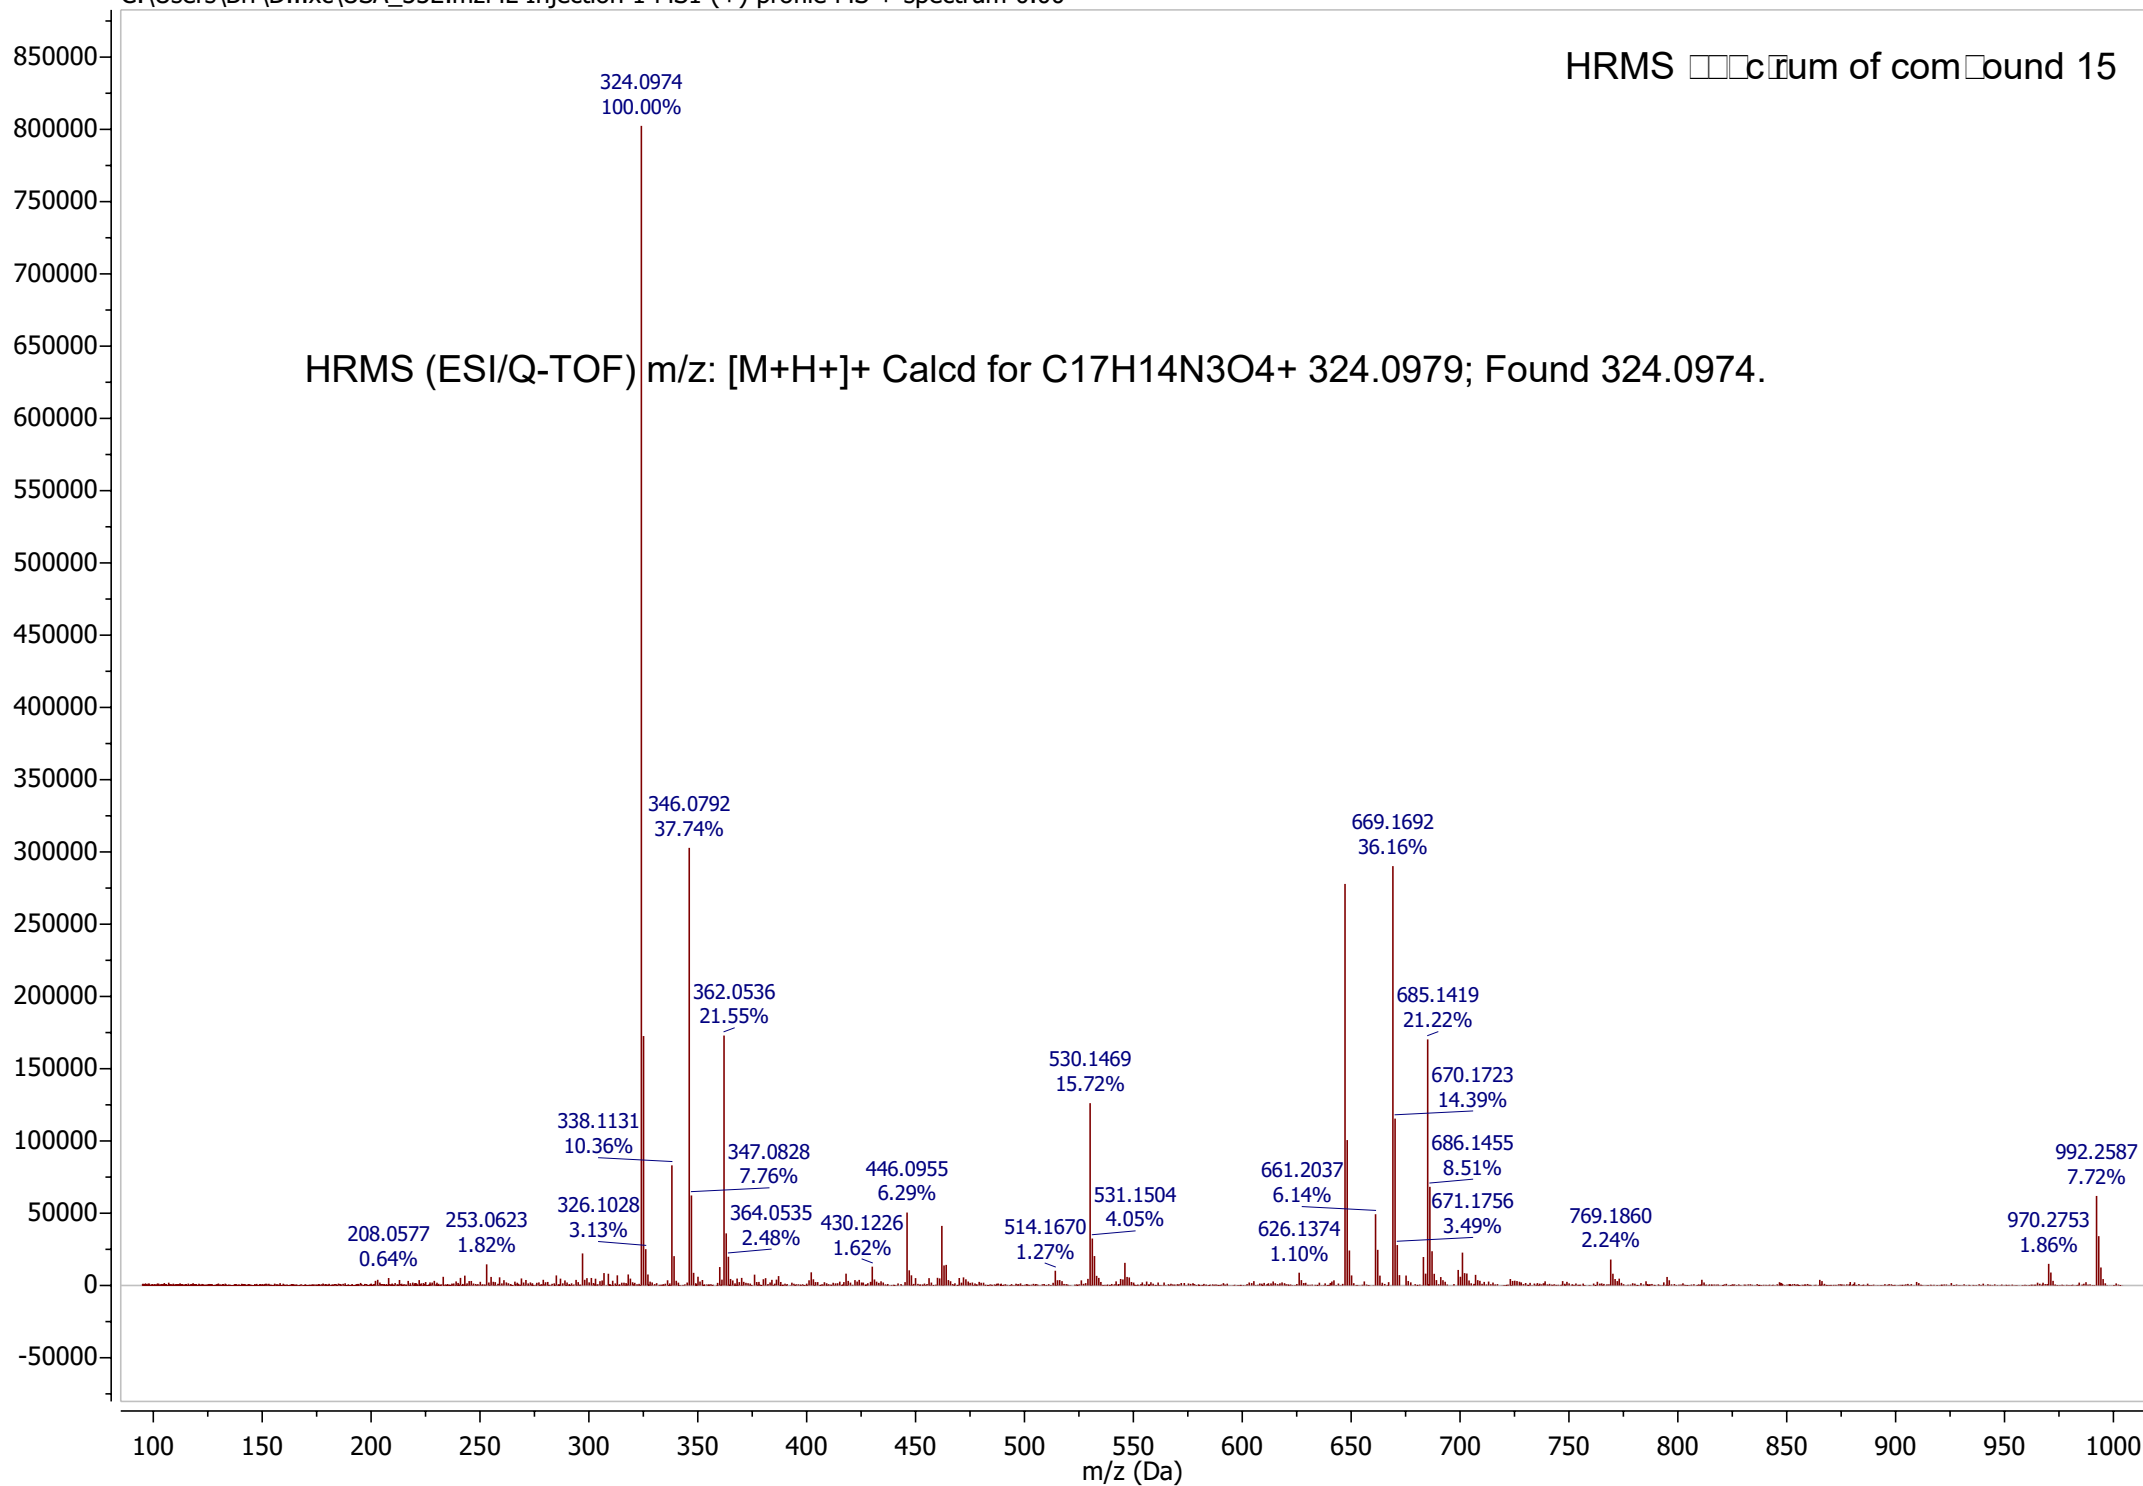

HRMS (ESI/Q-TOF) m/z: [M+Na]<sup>+</sup> Calcd for C<sub>27</sub>H<sub>24</sub>N<sub>4</sub>O<sub>3</sub>Na<sup>+</sup> 475.1741; Found 475.1730.

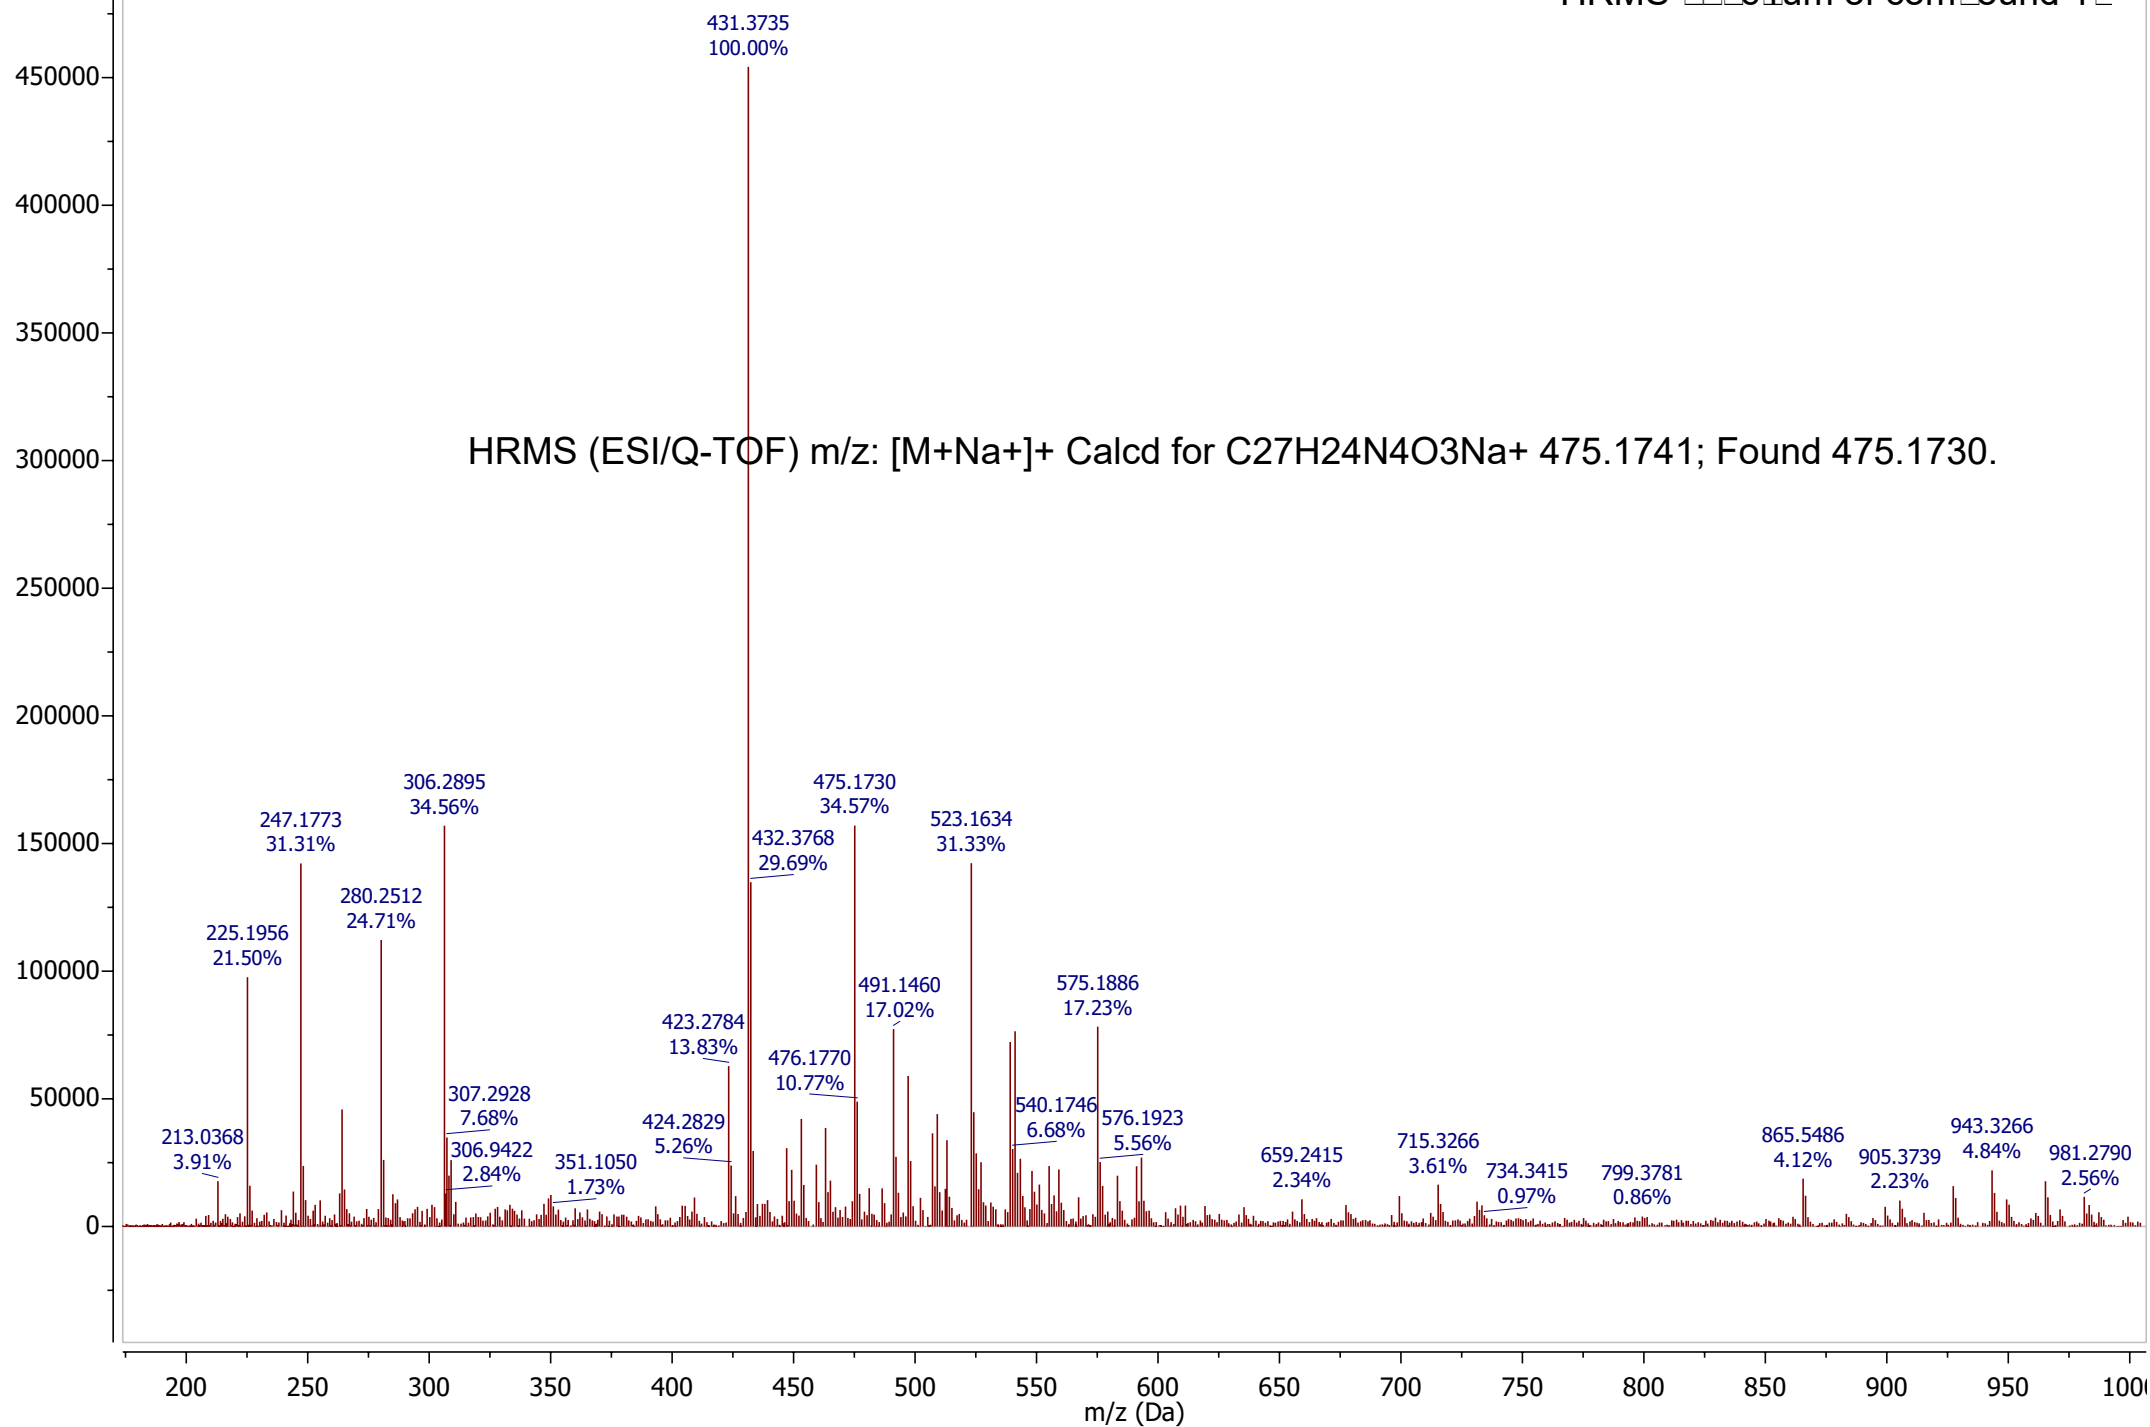

Supplement: s1 [file s1]
